# Supplementary material for: Digital Shade Matching in Dentistry: A Systematic Review
Source: MDPI journal article supplement (doi:10.3390/dj11110250), 2023-10-27
Supplement: s1 [file s1]

## **Table S14**

Quality of study analysis using  
Cochrane GRADEpro

# Colorimetry in Dentistry

**Question:** Digital photo compared to conventional technique in color sciences

| Certainty assessment |              |              |               |              |             |                      | № of patients |                        | Effect            |                   | Certainty | Importance |
|----------------------|--------------|--------------|---------------|--------------|-------------|----------------------|---------------|------------------------|-------------------|-------------------|-----------|------------|
| № of studies         | Study design | Risk of bias | Inconsistency | Indirectness | Imprecision | Other considerations | Digital photo | conventional technique | Relative (95% CI) | Absolute (95% CI) |           |            |

**Color assessment in dental prostheses: the use of smartphones as process tools**

|   |                       |             |             |             |             |                                                                         |  |   |   |   |                  |  |
|---|-----------------------|-------------|-------------|-------------|-------------|-------------------------------------------------------------------------|--|---|---|---|------------------|--|
| 1 | observational studies | not serious | not serious | not serious | not serious | all plausible residual confounding would reduce the demonstrated effect |  | - | - | - | ⊕⊕⊕○<br>MODERATE |  |
|---|-----------------------|-------------|-------------|-------------|-------------|-------------------------------------------------------------------------|--|---|---|---|------------------|--|

**Application of a digital technique in evaluating the reliability of shade guides**

|   |                       |             |             |             |                      |                                                                         |  |  |               |  |             |  |
|---|-----------------------|-------------|-------------|-------------|----------------------|-------------------------------------------------------------------------|--|--|---------------|--|-------------|--|
| 1 | observational studies | not serious | not serious | not serious | serious <sup>a</sup> | all plausible residual confounding would reduce the demonstrated effect |  |  | not estimable |  | ⊕⊕○○<br>LOW |  |
|---|-----------------------|-------------|-------------|-------------|----------------------|-------------------------------------------------------------------------|--|--|---------------|--|-------------|--|

| Certainty assessment |              |              |               |              |             |                      | № of patients |                        | Effect            |                   | Certainty | Importance |
|----------------------|--------------|--------------|---------------|--------------|-------------|----------------------|---------------|------------------------|-------------------|-------------------|-----------|------------|
| № of studies         | Study design | Risk of bias | Inconsistency | Indirectness | Imprecision | Other considerations | Digital photo | conventional technique | Relative (95% CI) | Absolute (95% CI) |           |            |

#### **In vitro evaluation of new dental software for shade matching**

|   |                       |                      |             |             |                      |                                                                                               |  |  |               |  |             |  |
|---|-----------------------|----------------------|-------------|-------------|----------------------|-----------------------------------------------------------------------------------------------|--|--|---------------|--|-------------|--|
| 1 | observational studies | serious <sup>b</sup> | not serious | not serious | serious <sup>c</sup> | strong association<br>all plausible residual confounding would reduce the demonstrated effect |  |  | not estimable |  | ⊕⊕○○<br>LOW |  |
|---|-----------------------|----------------------|-------------|-------------|----------------------|-----------------------------------------------------------------------------------------------|--|--|---------------|--|-------------|--|

#### **A novel regression model from RGB image data to spectroradiometric correlates optimized for tooth colored shades**

|   |                       |             |             |             |             |                    |  |  |               |  |                  |  |
|---|-----------------------|-------------|-------------|-------------|-------------|--------------------|--|--|---------------|--|------------------|--|
| 1 | observational studies | not serious | not serious | not serious | not serious | strong association |  |  | not estimable |  | ⊕⊕⊕○<br>MODERATE |  |
|---|-----------------------|-------------|-------------|-------------|-------------|--------------------|--|--|---------------|--|------------------|--|

#### **Photometric assessment of tooth color using commonly available software**

|   |                       |                      |             |             |             |                    |  |  |               |  |             |  |
|---|-----------------------|----------------------|-------------|-------------|-------------|--------------------|--|--|---------------|--|-------------|--|
| 1 | observational studies | serious <sup>d</sup> | not serious | not serious | not serious | strong association |  |  | not estimable |  | ⊕⊕○○<br>LOW |  |
|---|-----------------------|----------------------|-------------|-------------|-------------|--------------------|--|--|---------------|--|-------------|--|

| Certainty assessment |              |              |               |              |             |                      | № of patients |                        | Effect            |                   | Certainty | Importance |
|----------------------|--------------|--------------|---------------|--------------|-------------|----------------------|---------------|------------------------|-------------------|-------------------|-----------|------------|
| № of studies         | Study design | Risk of bias | Inconsistency | Indirectness | Imprecision | Other considerations | Digital photo | conventional technique | Relative (95% CI) | Absolute (95% CI) |           |            |

### The relationship of tooth shade and skin tone and its influence on the smile attractiveness

|   |                       |                      |             |             |             |                                                                                            |  |  |               |  |                  |  |
|---|-----------------------|----------------------|-------------|-------------|-------------|--------------------------------------------------------------------------------------------|--|--|---------------|--|------------------|--|
| 1 | observational studies | serious <sup>e</sup> | not serious | not serious | not serious | strong association all plausible residual confounding would reduce the demonstrated effect |  |  | not estimable |  | ⊕⊕⊕○<br>MODERATE |  |
|---|-----------------------|----------------------|-------------|-------------|-------------|--------------------------------------------------------------------------------------------|--|--|---------------|--|------------------|--|

### Evaluation of dental shade guide variability using cross-polarized photography

|   |                       |                      |             |             |             |      |  |  |               |   |                  |  |
|---|-----------------------|----------------------|-------------|-------------|-------------|------|--|--|---------------|---|------------------|--|
| 1 | observational studies | serious <sup>f</sup> | not serious | not serious | not serious | none |  |  | not estimable | - | ⊕○○○<br>VERY LOW |  |
|   |                       |                      |             |             |             |      |  |  |               |   |                  |  |

**CI:** Confidence interval

### Explanations

a. • Daylight regulations were not described • use of 74-pixel space was not explained.

b. • The reference shade tab was conveniently selected



- c. • Environmental factor control methods were not adequately described
- d. • Only measured the color of the premolar tooth
- e. • The study was conducted within the same ethnic group • There were multiple uncategorized variations within the shade guide
- f. • Shade tabs were conveniently selected

**Question:** Digital photo compared to conventional technique in color sciences

| Certainty assessment |              |              |               |              |             |                      | Nº of patients |                        | Effect            |                   | Certainty | Importance |
|----------------------|--------------|--------------|---------------|--------------|-------------|----------------------|----------------|------------------------|-------------------|-------------------|-----------|------------|
| Nº of studies        | Study design | Risk of bias | Inconsistency | Indirectness | Imprecision | Other considerations | Digital photo  | conventional technique | Relative (95% CI) | Absolute (95% CI) |           |            |

**Evaluating the relationship between tooth color and enamel thickness, using twin flash photography, cross-polarization photography, and spectrophotometer**

|   |                       |             |             |             |             |                    |  |  |               |  |                  |  |
|---|-----------------------|-------------|-------------|-------------|-------------|--------------------|--|--|---------------|--|------------------|--|
| 1 | observational studies | not serious | not serious | not serious | not serious | strong association |  |  | not estimable |  | ⊕⊕⊕○<br>MODERATE |  |
|---|-----------------------|-------------|-------------|-------------|-------------|--------------------|--|--|---------------|--|------------------|--|

**The use of a standardized gray reference card on dental photography to correct the effects of five commonly used diffusers on the color of 40 extracted human tooth**

|   |                       |                      |             |             |             |                    |  |  |               |  |             |  |
|---|-----------------------|----------------------|-------------|-------------|-------------|--------------------|--|--|---------------|--|-------------|--|
| 1 | observational studies | serious <sup>a</sup> | not serious | not serious | not serious | strong association |  |  | not estimable |  | ⊕⊕○○<br>LOW |  |
|---|-----------------------|----------------------|-------------|-------------|-------------|--------------------|--|--|---------------|--|-------------|--|

**The use of digital imaging for colour matching and communication in restorative dentistry**

| Certainty assessment |                       |                      |               |              |             |                      | № of patients |                        | Effect            |                   | Certainty   | Importance |
|----------------------|-----------------------|----------------------|---------------|--------------|-------------|----------------------|---------------|------------------------|-------------------|-------------------|-------------|------------|
| № of studies         | Study design          | Risk of bias         | Inconsistency | Indirectness | Imprecision | Other considerations | Digital photo | conventional technique | Relative (95% CI) | Absolute (95% CI) |             |            |
| 1                    | observational studies | serious <sup>b</sup> | not serious   | not serious  | not serious | strong association   |               |                        | not estimable     |                   | ⊕⊕○○<br>LOW |            |

#### The accuracy of dental shade matching using cross-polarization photography

|   |                       |             |             |             |             |                    |  |  |               |  |                  |  |
|---|-----------------------|-------------|-------------|-------------|-------------|--------------------|--|--|---------------|--|------------------|--|
| 1 | observational studies | not serious | not serious | not serious | not serious | strong association |  |  | not estimable |  | ⊕⊕⊕○<br>MODERATE |  |
|---|-----------------------|-------------|-------------|-------------|-------------|--------------------|--|--|---------------|--|------------------|--|

#### Assessment of the influence of gender and skin color on the preference of tooth shade in Saudi population

|   |                       |                      |             |             |                      |                                                                                               |  |  |               |  |             |  |
|---|-----------------------|----------------------|-------------|-------------|----------------------|-----------------------------------------------------------------------------------------------|--|--|---------------|--|-------------|--|
| 1 | observational studies | serious <sup>c</sup> | not serious | not serious | serious <sup>d</sup> | strong association<br>all plausible residual confounding would reduce the demonstrated effect |  |  | not estimable |  | ⊕⊕○○<br>LOW |  |
|---|-----------------------|----------------------|-------------|-------------|----------------------|-----------------------------------------------------------------------------------------------|--|--|---------------|--|-------------|--|

#### Mapping intraoral photographs on virtual teeth model

| Certainty assessment |                       |              |               |              |             |                      | № of patients |                        | Effect            |                   | Certainty        | Importance |
|----------------------|-----------------------|--------------|---------------|--------------|-------------|----------------------|---------------|------------------------|-------------------|-------------------|------------------|------------|
| № of studies         | Study design          | Risk of bias | Inconsistency | Indirectness | Imprecision | Other considerations | Digital photo | conventional technique | Relative (95% CI) | Absolute (95% CI) |                  |            |
| 1                    | observational studies | not serious  | not serious   | not serious  | not serious | strong association   |               |                        | not estimable     |                   | ⊕⊕⊕○<br>MODERATE |            |

**Comparison of visual analog shade matching, a digital visual method with a cross-polarized light filter, and a spectrophotometer for dental color matching**

|   |                       |             |             |             |             |                    |  |  |               |  |                  |  |
|---|-----------------------|-------------|-------------|-------------|-------------|--------------------|--|--|---------------|--|------------------|--|
| 1 | observational studies | not serious | not serious | not serious | not serious | strong association |  |  | not estimable |  | ⊕⊕⊕○<br>MODERATE |  |
|---|-----------------------|-------------|-------------|-------------|-------------|--------------------|--|--|---------------|--|------------------|--|

**CI:** Confidence interval

### Explanations

- a. • The sample characteristics were not clearly described
- b. • The shade tabs were conveniently selected • The observers had varying experience in restorative dentistry
- c. • Teeth shades were conveniently selected • Focused on only one ethnic group • Different lighting conditions and background were used while taking the photographs
- d. • Different lighting conditions and background were used while taking the photographs

**Question:** Digital photo compared to conventional technique in color sciences

| Certainty assessment |              |              |               |              |             |                      | № of patients |                        | Effect            |                   | Certainty | Importance |
|----------------------|--------------|--------------|---------------|--------------|-------------|----------------------|---------------|------------------------|-------------------|-------------------|-----------|------------|
| № of studies         | Study design | Risk of bias | Inconsistency | Indirectness | Imprecision | Other considerations | Digital photo | conventional technique | Relative (95% CI) | Absolute (95% CI) |           |            |

**Comparison of shade matching photos taken with gray card and without gray card**

|   |                       |                      |             |             |                      |                                                                         |  |  |               |  |                  |  |
|---|-----------------------|----------------------|-------------|-------------|----------------------|-------------------------------------------------------------------------|--|--|---------------|--|------------------|--|
| 1 | observational studies | serious <sup>a</sup> | not serious | not serious | serious <sup>b</sup> | all plausible residual confounding would reduce the demonstrated effect |  |  | not estimable |  | ⊕○○○<br>VERY LOW |  |
|---|-----------------------|----------------------|-------------|-------------|----------------------|-------------------------------------------------------------------------|--|--|---------------|--|------------------|--|

**The in vitro and in vivo reproducibility of a video-based digital imaging system for tooth colour measurement**

|   |                       |                      |             |             |             |                    |  |  |               |  |             |  |
|---|-----------------------|----------------------|-------------|-------------|-------------|--------------------|--|--|---------------|--|-------------|--|
| 1 | observational studies | serious <sup>c</sup> | not serious | not serious | not serious | strong association |  |  | not estimable |  | ⊕⊕○○<br>LOW |  |
|---|-----------------------|----------------------|-------------|-------------|-------------|--------------------|--|--|---------------|--|-------------|--|

**Assessing Tooth Color Differences in Digital Facial Portraits**

|   |                       |                      |             |             |             |                    |  |  |               |  |             |  |
|---|-----------------------|----------------------|-------------|-------------|-------------|--------------------|--|--|---------------|--|-------------|--|
| 1 | observational studies | serious <sup>d</sup> | not serious | not serious | not serious | strong association |  |  | not estimable |  | ⊕⊕○○<br>LOW |  |
|---|-----------------------|----------------------|-------------|-------------|-------------|--------------------|--|--|---------------|--|-------------|--|

| Certainty assessment |              |              |               |              |             |                      | № of patients |                        | Effect            |                   | Certainty | Importance |
|----------------------|--------------|--------------|---------------|--------------|-------------|----------------------|---------------|------------------------|-------------------|-------------------|-----------|------------|
| № of studies         | Study design | Risk of bias | Inconsistency | Indirectness | Imprecision | Other considerations | Digital photo | conventional technique | Relative (95% CI) | Absolute (95% CI) |           |            |

**In-vivo tooth color-measurement with a new 3D intraoral scanning system in comparison to conventional digital and visual color determination method**

|   |                       |                      |             |             |             |                                                                                               |  |  |               |  |                  |  |
|---|-----------------------|----------------------|-------------|-------------|-------------|-----------------------------------------------------------------------------------------------|--|--|---------------|--|------------------|--|
| 1 | observational studies | serious <sup>e</sup> | not serious | not serious | not serious | strong association<br>all plausible residual confounding would reduce the demonstrated effect |  |  | not estimable |  | ⊕⊕⊕○<br>MODERATE |  |
|---|-----------------------|----------------------|-------------|-------------|-------------|-----------------------------------------------------------------------------------------------|--|--|---------------|--|------------------|--|

**Comparison of photographic and conventional methods for tooth shade selection: A clinical evaluation**

|   |                       |                      |             |             |             |                                                                                               |  |  |               |  |                  |  |
|---|-----------------------|----------------------|-------------|-------------|-------------|-----------------------------------------------------------------------------------------------|--|--|---------------|--|------------------|--|
| 1 | observational studies | serious <sup>f</sup> | not serious | not serious | not serious | strong association<br>all plausible residual confounding would reduce the demonstrated effect |  |  | not estimable |  | ⊕⊕⊕○<br>MODERATE |  |
|---|-----------------------|----------------------|-------------|-------------|-------------|-----------------------------------------------------------------------------------------------|--|--|---------------|--|------------------|--|

| Certainty assessment |              |              |               |              |             |                      | № of patients |                        | Effect            |                   | Certainty | Importance |
|----------------------|--------------|--------------|---------------|--------------|-------------|----------------------|---------------|------------------------|-------------------|-------------------|-----------|------------|
| № of studies         | Study design | Risk of bias | Inconsistency | Indirectness | Imprecision | Other considerations | Digital photo | conventional technique | Relative (95% CI) | Absolute (95% CI) |           |            |

#### Contributions of dental colour to the physical attractiveness stereotype

|   |                       |         |             |             |             |      |  |  |               |  |                  |  |
|---|-----------------------|---------|-------------|-------------|-------------|------|--|--|---------------|--|------------------|--|
| 1 | observational studies | serious | not serious | not serious | not serious | none |  |  | not estimable |  | ⊕○○○<br>VERY LOW |  |
|---|-----------------------|---------|-------------|-------------|-------------|------|--|--|---------------|--|------------------|--|

#### Variability of color matching with different digital photography techniques and a reference card

|   |                       |             |             |             |             |                    |  |  |               |  |                  |  |
|---|-----------------------|-------------|-------------|-------------|-------------|--------------------|--|--|---------------|--|------------------|--|
| 1 | observational studies | not serious | not serious | not serious | not serious | strong association |  |  | not estimable |  | ⊕⊕⊕○<br>MODERATE |  |
|---|-----------------------|-------------|-------------|-------------|-------------|--------------------|--|--|---------------|--|------------------|--|

**CI:** Confidence interval

#### Explanations

- a. • Incomplete description of camera settings were provided
- b. • Incomplete description of camera settings were provided • Statistical analyses and values were not provided
- c. • The shade guide was conveniently selected • Incomplete camera description was provided • For in vivo analysis only central incisor was used as sample
- d. • The study was conducted between 2 specific ethnic groups
- e. • The teeth were conveniently selected for color analysis

f. • Only the middle third of the maxillary right central incisor was evaluated • Daylight regulations were not described

g. • Full description of the camera setup was not provided • Ethnic variations were not considered • Dental student observers were used that may not represent the general population

**Question:** Digital photo compared to conventional technique in color sciences

| Certainty assessment |              |              |               |              |             |                      | № of patients |                        | Effect            |                   | Certainty | Importance |
|----------------------|--------------|--------------|---------------|--------------|-------------|----------------------|---------------|------------------------|-------------------|-------------------|-----------|------------|
| № of studies         | Study design | Risk of bias | Inconsistency | Indirectness | Imprecision | Other considerations | Digital photo | conventional technique | Relative (95% CI) | Absolute (95% CI) |           |            |

**Dental shade guide variability for hues B, C and D using cross- polarized photography**

|   |                       |             |             |             |             |      |  |  |               |  |             |  |
|---|-----------------------|-------------|-------------|-------------|-------------|------|--|--|---------------|--|-------------|--|
| 1 | observational studies | not serious | not serious | not serious | not serious | none |  |  | not estimable |  | ⊕⊕○○<br>LOW |  |
|---|-----------------------|-------------|-------------|-------------|-------------|------|--|--|---------------|--|-------------|--|

**Shade Matching Assisted by Digital Photography and Computer Software**

|   |                       |             |             |             |             |      |  |  |               |  |             |  |
|---|-----------------------|-------------|-------------|-------------|-------------|------|--|--|---------------|--|-------------|--|
| 1 | observational studies | not serious | not serious | not serious | not serious | none |  |  | not estimable |  | ⊕⊕○○<br>LOW |  |
|---|-----------------------|-------------|-------------|-------------|-------------|------|--|--|---------------|--|-------------|--|

**The in vitro and in vivo of a mobile non-contact camera-based digital imaging system for tooth color measurement**

|   |                       |             |             |             |             |                    |  |  |               |  |                  |  |
|---|-----------------------|-------------|-------------|-------------|-------------|--------------------|--|--|---------------|--|------------------|--|
| 1 | observational studies | not serious | not serious | not serious | not serious | strong association |  |  | not estimable |  | ⊕⊕⊕○<br>MODERATE |  |
|---|-----------------------|-------------|-------------|-------------|-------------|--------------------|--|--|---------------|--|------------------|--|

| Certainty assessment |              |              |               |              |             |                      | № of patients |                        | Effect            |                   | Certainty | Importance |
|----------------------|--------------|--------------|---------------|--------------|-------------|----------------------|---------------|------------------------|-------------------|-------------------|-----------|------------|
| № of studies         | Study design | Risk of bias | Inconsistency | Indirectness | Imprecision | Other considerations | Digital photo | conventional technique | Relative (95% CI) | Absolute (95% CI) |           |            |

#### Dental shade matching using a digital camera

|   |                       |                      |             |             |             |                                                                         |  |  |               |  |             |  |
|---|-----------------------|----------------------|-------------|-------------|-------------|-------------------------------------------------------------------------|--|--|---------------|--|-------------|--|
| 1 | observational studies | serious <sup>a</sup> | not serious | not serious | not serious | all plausible residual confounding would reduce the demonstrated effect |  |  | not estimable |  | ⊕⊕○○<br>LOW |  |
|---|-----------------------|----------------------|-------------|-------------|-------------|-------------------------------------------------------------------------|--|--|---------------|--|-------------|--|

#### Accurate shade image matching by using a smartphone camera

|   |                       |                      |             |             |             |                                                                                               |  |  |               |  |                  |  |
|---|-----------------------|----------------------|-------------|-------------|-------------|-----------------------------------------------------------------------------------------------|--|--|---------------|--|------------------|--|
| 1 | observational studies | serious <sup>b</sup> | not serious | not serious | not serious | strong association<br>all plausible residual confounding would reduce the demonstrated effect |  |  | not estimable |  | ⊕⊕⊕○<br>MODERATE |  |
|---|-----------------------|----------------------|-------------|-------------|-------------|-----------------------------------------------------------------------------------------------|--|--|---------------|--|------------------|--|

#### Development of digital shade guides for color assessment using a digital camera with ring flashes



| Certainty assessment |                       |              |               |              |             |                      | № of patients |                        | Effect            |                   | Certainty        | Importance |
|----------------------|-----------------------|--------------|---------------|--------------|-------------|----------------------|---------------|------------------------|-------------------|-------------------|------------------|------------|
| № of studies         | Study design          | Risk of bias | Inconsistency | Indirectness | Imprecision | Other considerations | Digital photo | conventional technique | Relative (95% CI) | Absolute (95% CI) |                  |            |
| 1                    | observational studies | not serious  | not serious   | not serious  | not serious | strong association   |               |                        | not estimable     |                   | ⊕⊕⊕○<br>MODERATE |            |

#### A Study on Possibility of Clinical Application for Color Measurements of Shade Guides Using an Intraoral Digital Scanner

|   |                       |                      |             |             |             |                    |  |  |               |  |             |  |
|---|-----------------------|----------------------|-------------|-------------|-------------|--------------------|--|--|---------------|--|-------------|--|
| 1 | observational studies | serious <sup>c</sup> | not serious | not serious | not serious | strong association |  |  | not estimable |  | ⊕⊕○○<br>LOW |  |
|---|-----------------------|----------------------|-------------|-------------|-------------|--------------------|--|--|---------------|--|-------------|--|

**CI:** Confidence interval

#### Explanations

- a. • The shade tab was conveniently selected
- b. • A color temperature meter would be needed for doing SVM color analysis because a constant illumination is required
- c. • The shade tabs were conveniently selected and only includes 5 tabs • The measurements were taken by a single observer

**Question:** Digital photo compared to conventional technique in color sciences

| Certainty assessment |              |              |               |              |             |                      | № of patients |                        | Effect            |                   | Certainty | Importance |
|----------------------|--------------|--------------|---------------|--------------|-------------|----------------------|---------------|------------------------|-------------------|-------------------|-----------|------------|
| № of studies         | Study design | Risk of bias | Inconsistency | Indirectness | Imprecision | Other considerations | Digital photo | conventional technique | Relative (95% CI) | Absolute (95% CI) |           |            |

**The development of a 3D color reproduction system of digital impressions with an intraoral scanner and a 3D printer: a preliminary study**

|   |                       |             |             |             |             |                                                                                               |  |  |               |  |              |  |
|---|-----------------------|-------------|-------------|-------------|-------------|-----------------------------------------------------------------------------------------------|--|--|---------------|--|--------------|--|
| 1 | observational studies | not serious | not serious | not serious | not serious | strong association<br>all plausible residual confounding would reduce the demonstrated effect |  |  | not estimable |  | ⊕⊕⊕⊕<br>HIGH |  |
|---|-----------------------|-------------|-------------|-------------|-------------|-----------------------------------------------------------------------------------------------|--|--|---------------|--|--------------|--|

### Color accuracy of commercial digital cameras for use in dentistry

|   |                       |                      |             |             |             |                                                                                               |  |  |               |  |                  |  |
|---|-----------------------|----------------------|-------------|-------------|-------------|-----------------------------------------------------------------------------------------------|--|--|---------------|--|------------------|--|
| 1 | observational studies | serious <sup>a</sup> | not serious | not serious | not serious | strong association<br>all plausible residual confounding would reduce the demonstrated effect |  |  | not estimable |  | ⊕⊕⊕○<br>MODERATE |  |
|---|-----------------------|----------------------|-------------|-------------|-------------|-----------------------------------------------------------------------------------------------|--|--|---------------|--|------------------|--|

### A Digital Shade-Matching Device for Dental Color Determination Using the Support Vector Machine Algorithm

|   |                       |             |             |             |             |                    |  |  |               |  |                  |  |
|---|-----------------------|-------------|-------------|-------------|-------------|--------------------|--|--|---------------|--|------------------|--|
| 1 | observational studies | not serious | not serious | not serious | not serious | strong association |  |  | not estimable |  | ⊕⊕⊕○<br>MODERATE |  |
|---|-----------------------|-------------|-------------|-------------|-------------|--------------------|--|--|---------------|--|------------------|--|

### Comparative Analysis of Color Matching System for Teeth Recognition Using Color Moment

|   |                       |                      |             |             |             |                    |  |  |               |  |             |  |
|---|-----------------------|----------------------|-------------|-------------|-------------|--------------------|--|--|---------------|--|-------------|--|
| 1 | observational studies | serious <sup>b</sup> | not serious | not serious | not serious | strong association |  |  | not estimable |  | ⊕⊕○○<br>LOW |  |
|---|-----------------------|----------------------|-------------|-------------|-------------|--------------------|--|--|---------------|--|-------------|--|

### An efficient image processing methodology based on fuzzy decision for dental shade matching

|   |                       |             |             |             |             |                                                                         |  |  |               |  |                  |  |
|---|-----------------------|-------------|-------------|-------------|-------------|-------------------------------------------------------------------------|--|--|---------------|--|------------------|--|
| 1 | observational studies | not serious | not serious | not serious | not serious | all plausible residual confounding would reduce the demonstrated effect |  |  | not estimable |  | ⊕⊕⊕○<br>MODERATE |  |
|---|-----------------------|-------------|-------------|-------------|-------------|-------------------------------------------------------------------------|--|--|---------------|--|------------------|--|

**Could digital imaging be an alternative for digital colorimeters?**

|   |                       |             |             |             |             |                                                                         |  |  |               |  |                  |  |
|---|-----------------------|-------------|-------------|-------------|-------------|-------------------------------------------------------------------------|--|--|---------------|--|------------------|--|
| 1 | observational studies | not serious | not serious | not serious | not serious | all plausible residual confounding would reduce the demonstrated effect |  |  | not estimable |  | ⊕⊕⊕○<br>MODERATE |  |
|---|-----------------------|-------------|-------------|-------------|-------------|-------------------------------------------------------------------------|--|--|---------------|--|------------------|--|

**A comparison between a new visual method of color matching by intraoral camera and conventional visual and spectrometric methods**

|   |                       |             |             |             |             |                                                                                            |  |  |               |  |              |  |
|---|-----------------------|-------------|-------------|-------------|-------------|--------------------------------------------------------------------------------------------|--|--|---------------|--|--------------|--|
| 1 | observational studies | not serious | not serious | not serious | not serious | strong association all plausible residual confounding would reduce the demonstrated effect |  |  | not estimable |  | ⊕⊕⊕⊕<br>HIGH |  |
|---|-----------------------|-------------|-------------|-------------|-------------|--------------------------------------------------------------------------------------------|--|--|---------------|--|--------------|--|

**CI:** Confidence interval

**Explanations**

- a. • The cameras, shade tabs and color patches were conveniently selected
- b. • Racial and geographic dental shade variations were not considered during the design

# Endodontics and Dental Esthetics

**Question:** Digital photo compared to conventional technique in endodontics and restorative dentistry

| Certainty assessment |              |              |               |              |             |                      | № of patients |                        | Effect            |                   | Certainty | Importance |
|----------------------|--------------|--------------|---------------|--------------|-------------|----------------------|---------------|------------------------|-------------------|-------------------|-----------|------------|
| № of studies         | Study design | Risk of bias | Inconsistency | Indirectness | Imprecision | Other considerations | Digital photo | conventional technique | Relative (95% CI) | Absolute (95% CI) |           |            |

**Digital photography vs. clinical assessment of resin composite restorations**

|   |                       |                      |             |             |             |                                                                                               |  |  |               |  |                  |  |
|---|-----------------------|----------------------|-------------|-------------|-------------|-----------------------------------------------------------------------------------------------|--|--|---------------|--|------------------|--|
| 1 | observational studies | serious <sup>a</sup> | not serious | not serious | not serious | strong association<br>all plausible residual confounding would reduce the demonstrated effect |  |  | not estimable |  | ⊕⊕⊕○<br>MODERATE |  |
|---|-----------------------|----------------------|-------------|-------------|-------------|-----------------------------------------------------------------------------------------------|--|--|---------------|--|------------------|--|

**Color Masking White Fluorotic Spots by Resin Infiltration and Its Quantitation by Computerized Photographic Analysis: A 12-month Follow-up Study**

|   |                       |             |             |             |             |                    |  |  |               |  |                  |  |
|---|-----------------------|-------------|-------------|-------------|-------------|--------------------|--|--|---------------|--|------------------|--|
| 1 | observational studies | not serious | not serious | not serious | not serious | strong association |  |  | not estimable |  | ⊕⊕⊕○<br>MODERATE |  |
|---|-----------------------|-------------|-------------|-------------|-------------|--------------------|--|--|---------------|--|------------------|--|

| Certainty assessment |              |              |               |              |             |                      | № of patients |                        | Effect            |                   | Certainty | Importance |
|----------------------|--------------|--------------|---------------|--------------|-------------|----------------------|---------------|------------------------|-------------------|-------------------|-----------|------------|
| № of studies         | Study design | Risk of bias | Inconsistency | Indirectness | Imprecision | Other considerations | Digital photo | conventional technique | Relative (95% CI) | Absolute (95% CI) |           |            |

#### **Interrater and intrarater reliability of FDI criteria applied to photographs of posterior tooth-colored restorations**

|   |                       |                      |             |             |             |                    |  |  |               |  |             |  |
|---|-----------------------|----------------------|-------------|-------------|-------------|--------------------|--|--|---------------|--|-------------|--|
| 1 | observational studies | serious <sup>b</sup> | not serious | not serious | not serious | strong association |  |  | not estimable |  | ⊕⊕○○<br>LOW |  |
|---|-----------------------|----------------------|-------------|-------------|-------------|--------------------|--|--|---------------|--|-------------|--|

#### **Evaluation of a technique for color correction in restoring anterior teeth**

|   |                       |             |             |             |             |                                                                                               |  |  |               |  |              |  |
|---|-----------------------|-------------|-------------|-------------|-------------|-----------------------------------------------------------------------------------------------|--|--|---------------|--|--------------|--|
| 1 | observational studies | not serious | not serious | not serious | not serious | strong association<br>all plausible residual confounding would reduce the demonstrated effect |  |  | not estimable |  | ⊕⊕⊕⊕<br>HIGH |  |
|---|-----------------------|-------------|-------------|-------------|-------------|-----------------------------------------------------------------------------------------------|--|--|---------------|--|--------------|--|

#### **In-Vitro Computer Analysis of Digital Images on ToothColored Restorative Material Using L\*a\*b\* Values**

|   |                       |             |             |             |             |                    |  |  |               |  |                  |  |
|---|-----------------------|-------------|-------------|-------------|-------------|--------------------|--|--|---------------|--|------------------|--|
| 1 | observational studies | not serious | not serious | not serious | not serious | strong association |  |  | not estimable |  | ⊕⊕⊕○<br>MODERATE |  |
|---|-----------------------|-------------|-------------|-------------|-------------|--------------------|--|--|---------------|--|------------------|--|

| Certainty assessment |              |              |               |              |             |                      | Nº of patients |                        | Effect            |                   | Certainty | Importance |
|----------------------|--------------|--------------|---------------|--------------|-------------|----------------------|----------------|------------------------|-------------------|-------------------|-----------|------------|
| Nº of studies        | Study design | Risk of bias | Inconsistency | Indirectness | Imprecision | Other considerations | Digital photo  | conventional technique | Relative (95% CI) | Absolute (95% CI) |           |            |

#### CIE L\*a\*b\*: comparison of digital images obtained photographically by manual and automatic modes

|   |                       |                      |             |             |             |                                                                                            |  |  |               |  |                  |  |
|---|-----------------------|----------------------|-------------|-------------|-------------|--------------------------------------------------------------------------------------------|--|--|---------------|--|------------------|--|
| 1 | observational studies | serious <sup>c</sup> | not serious | not serious | not serious | strong association all plausible residual confounding would reduce the demonstrated effect |  |  | not estimable |  | ⊕⊕⊕○<br>MODERATE |  |
|---|-----------------------|----------------------|-------------|-------------|-------------|--------------------------------------------------------------------------------------------|--|--|---------------|--|------------------|--|

#### Sensitivity of digital dental photo CIE L\*a\*b\* analysis compared to spectrophotometer clinical assessments over 6 months

|   |                       |             |             |             |             |      |  |  |               |  |             |  |
|---|-----------------------|-------------|-------------|-------------|-------------|------|--|--|---------------|--|-------------|--|
| 1 | observational studies | not serious | not serious | not serious | not serious | none |  |  | not estimable |  | ⊕⊕○○<br>LOW |  |
|---|-----------------------|-------------|-------------|-------------|-------------|------|--|--|---------------|--|-------------|--|

**CI:** Confidence interval

#### Explanations

- a. • Incomplete description of environment was provided • Inter-observer reliability was not performed
- b. • Only the occlusal restorations were evaluated • Only 2 of the 5 raters were conveniently selected for re-evaluation

c. • Only one camera and brand were evaluated

**Question:** Digital photo compared to conventional technique in endodontics and restorative dentistry

| Certainty assessment |              |              |               |              |             |                      | Nº of patients |                        | Effect            |                   | Certainty | Importance |
|----------------------|--------------|--------------|---------------|--------------|-------------|----------------------|----------------|------------------------|-------------------|-------------------|-----------|------------|
| Nº of studies        | Study design | Risk of bias | Inconsistency | Indirectness | Imprecision | Other considerations | Digital photo  | conventional technique | Relative (95% CI) | Absolute (95% CI) |           |            |

**Assessment of Color Parameters of Composite Resin Shade Guides Using Digital Imaging versus Colorimeterjerd\_370**

|   |                       |                      |             |             |             |                                                                         |  |  |               |  |             |  |
|---|-----------------------|----------------------|-------------|-------------|-------------|-------------------------------------------------------------------------|--|--|---------------|--|-------------|--|
| 1 | observational studies | serious <sup>a</sup> | not serious | not serious | not serious | all plausible residual confounding would reduce the demonstrated effect |  |  | not estimable |  | ⊕⊕○○<br>LOW |  |
|---|-----------------------|----------------------|-------------|-------------|-------------|-------------------------------------------------------------------------|--|--|---------------|--|-------------|--|

**Quantitative Analysis of KTP Laser Photodynamic Bleaching of Tetracycline-Discolored Teeth**

|   |                       |             |             |             |             |                    |  |  |               |  |                  |  |
|---|-----------------------|-------------|-------------|-------------|-------------|--------------------|--|--|---------------|--|------------------|--|
| 1 | observational studies | not serious | not serious | not serious | not serious | strong association |  |  | not estimable |  | ⊕⊕⊕○<br>MODERATE |  |
|---|-----------------------|-------------|-------------|-------------|-------------|--------------------|--|--|---------------|--|------------------|--|



### The Use of Objective Digital Matching to Achieve Aesthetic Composite Restoration

|   |                       |                      |             |             |             |                                                                                               |  |  |               |  |                  |  |
|---|-----------------------|----------------------|-------------|-------------|-------------|-----------------------------------------------------------------------------------------------|--|--|---------------|--|------------------|--|
| 1 | observational studies | serious <sup>b</sup> | not serious | not serious | not serious | strong association<br>all plausible residual confounding would reduce the demonstrated effect |  |  | not estimable |  | ⊕⊕⊕○<br>MODERATE |  |
|---|-----------------------|----------------------|-------------|-------------|-------------|-----------------------------------------------------------------------------------------------|--|--|---------------|--|------------------|--|

### Subjective and photometric determination of bleaching outcomes

|   |                       |             |             |             |             |                    |  |  |               |  |                  |  |
|---|-----------------------|-------------|-------------|-------------|-------------|--------------------|--|--|---------------|--|------------------|--|
| 1 | observational studies | not serious | not serious | not serious | not serious | strong association |  |  | not estimable |  | ⊕⊕⊕○<br>MODERATE |  |
|---|-----------------------|-------------|-------------|-------------|-------------|--------------------|--|--|---------------|--|------------------|--|

### Development of a stain shade guide to aid the measurement of extrinsic dental stain

|   |                       |                      |             |             |             |                                                                                               |  |  |               |  |                  |  |
|---|-----------------------|----------------------|-------------|-------------|-------------|-----------------------------------------------------------------------------------------------|--|--|---------------|--|------------------|--|
| 1 | observational studies | serious <sup>c</sup> | not serious | not serious | not serious | strong association<br>all plausible residual confounding would reduce the demonstrated effect |  |  | not estimable |  | ⊕⊕⊕○<br>MODERATE |  |
|---|-----------------------|----------------------|-------------|-------------|-------------|-----------------------------------------------------------------------------------------------|--|--|---------------|--|------------------|--|

### Measurement of stain removal in vitro: a comparison of two instrumental methods

|   |                       |             |             |             |             |                                                                                               |  |  |               |  |              |  |
|---|-----------------------|-------------|-------------|-------------|-------------|-----------------------------------------------------------------------------------------------|--|--|---------------|--|--------------|--|
| 1 | observational studies | not serious | not serious | not serious | not serious | strong association<br>all plausible residual confounding would reduce the demonstrated effect |  |  | not estimable |  | ⊕⊕⊕⊕<br>HIGH |  |
|---|-----------------------|-------------|-------------|-------------|-------------|-----------------------------------------------------------------------------------------------|--|--|---------------|--|--------------|--|

### The measurement of tooth whiteness by image analysis and spectrophotometry: a comparison

|   |                       |             |             |             |             |                                                                         |  |  |               |  |                  |  |
|---|-----------------------|-------------|-------------|-------------|-------------|-------------------------------------------------------------------------|--|--|---------------|--|------------------|--|
| 1 | observational studies | not serious | not serious | not serious | not serious | all plausible residual confounding would reduce the demonstrated effect |  |  | not estimable |  | ⊕⊕⊕○<br>MODERATE |  |
|---|-----------------------|-------------|-------------|-------------|-------------|-------------------------------------------------------------------------|--|--|---------------|--|------------------|--|

**CI:** Confidence interval

### Explanations

- a. • Shade tabs were conveniently selected
- b. • The color chips, composite materials were conveniently selected • Only central incisor was used • Experts from dentistry were selected as observers
- c. • Acrylic shades were conveniently selected • The study relied heavily on staining by caffeine-based tea solution

**Question:** Digital photo compared to conventional technique in endodontics and restorative dentistry

| Certainty assessment |              |              |               |              |             |                      | № of patients |                        | Effect            |                   | Certainty | Importance |
|----------------------|--------------|--------------|---------------|--------------|-------------|----------------------|---------------|------------------------|-------------------|-------------------|-----------|------------|
| № of studies         | Study design | Risk of bias | Inconsistency | Indirectness | Imprecision | Other considerations | Digital photo | conventional technique | Relative (95% CI) | Absolute (95% CI) |           |            |

**Evaluation of intraoral CCD camera for dental examination in forensic inspection**

|   |                       |             |             |             |             |      |  |  |               |  |             |  |
|---|-----------------------|-------------|-------------|-------------|-------------|------|--|--|---------------|--|-------------|--|
| 1 | observational studies | not serious | not serious | not serious | not serious | none |  |  | not estimable |  | ⊕⊕○○<br>LOW |  |
|---|-----------------------|-------------|-------------|-------------|-------------|------|--|--|---------------|--|-------------|--|

**Quantification of vital bleaching by computer analysis of photographic images**

|   |                       |                      |             |             |             |                                                                         |  |  |               |  |             |  |
|---|-----------------------|----------------------|-------------|-------------|-------------|-------------------------------------------------------------------------|--|--|---------------|--|-------------|--|
| 1 | observational studies | serious <sup>a</sup> | not serious | not serious | not serious | all plausible residual confounding would reduce the demonstrated effect |  |  | not estimable |  | ⊕⊕○○<br>LOW |  |
|---|-----------------------|----------------------|-------------|-------------|-------------|-------------------------------------------------------------------------|--|--|---------------|--|-------------|--|

**CI:** Confidence interval

**Explanations**

a. • Participants were conveniently selected

# Maxillofacial Prostheses

**Question:** Digital photo compared to conventional technique in maxillofacial prosthesis

| Certainty assessment |              |              |               |              |             |                      | № of patients |                        | Effect            |                   | Certainty | Importance |
|----------------------|--------------|--------------|---------------|--------------|-------------|----------------------|---------------|------------------------|-------------------|-------------------|-----------|------------|
| № of studies         | Study design | Risk of bias | Inconsistency | Indirectness | Imprecision | Other considerations | Digital photo | conventional technique | Relative (95% CI) | Absolute (95% CI) |           |            |

**Perceptibility and acceptability thresholds of simulated facial skin color differences**

|   |                       |                      |             |             |             |                                                                                               |  |  |               |  |                  |           |
|---|-----------------------|----------------------|-------------|-------------|-------------|-----------------------------------------------------------------------------------------------|--|--|---------------|--|------------------|-----------|
| 1 | observational studies | serious <sup>a</sup> | not serious | not serious | not serious | strong association<br>all plausible residual confounding would reduce the demonstrated effect |  |  | not estimable |  | ⊕⊕⊕○<br>MODERATE | IMPORTANT |
|---|-----------------------|----------------------|-------------|-------------|-------------|-----------------------------------------------------------------------------------------------|--|--|---------------|--|------------------|-----------|

**Suitability of a Mobile Phone Colorimeter Application for Use as an Objective Aid when Matching Skin Color during the Fabrication of a Maxillofacial Prosthesis**

|   |                       |                      |             |             |             |                                                                                               |  |  |               |  |                  |  |
|---|-----------------------|----------------------|-------------|-------------|-------------|-----------------------------------------------------------------------------------------------|--|--|---------------|--|------------------|--|
| 1 | observational studies | serious <sup>b</sup> | not serious | not serious | not serious | strong association<br>all plausible residual confounding would reduce the demonstrated effect |  |  | not estimable |  | ⊕⊕⊕○<br>MODERATE |  |
|---|-----------------------|----------------------|-------------|-------------|-------------|-----------------------------------------------------------------------------------------------|--|--|---------------|--|------------------|--|

**Original Alternative Technique of Iris Fabrication for Ocular Prostheses**

|   |                       |             |             |             |             |      |  |   |   |   |             |  |
|---|-----------------------|-------------|-------------|-------------|-------------|------|--|---|---|---|-------------|--|
| 1 | observational studies | not serious | not serious | not serious | not serious | none |  | - | - | - | ⊕⊕○○<br>LOW |  |
|---|-----------------------|-------------|-------------|-------------|-------------|------|--|---|---|---|-------------|--|

**Better understanding of digital photography for skin color measurement: With a special emphasis on light characteristics**

|   |                       |                      |             |             |             |                                                                                               |  |  |               |  |                  |  |
|---|-----------------------|----------------------|-------------|-------------|-------------|-----------------------------------------------------------------------------------------------|--|--|---------------|--|------------------|--|
| 1 | observational studies | serious <sup>c</sup> | not serious | not serious | not serious | strong association<br>all plausible residual confounding would reduce the demonstrated effect |  |  | not estimable |  | ⊕⊕⊕○<br>MODERATE |  |
|---|-----------------------|----------------------|-------------|-------------|-------------|-----------------------------------------------------------------------------------------------|--|--|---------------|--|------------------|--|

### Colour quality of facial prostheses in additive manufacturing

|   |                       |             |             |             |             |      |  |  |               |  |             |  |
|---|-----------------------|-------------|-------------|-------------|-------------|------|--|--|---------------|--|-------------|--|
| 1 | observational studies | not serious | not serious | not serious | not serious | none |  |  | not estimable |  | ⊕⊕○○<br>LOW |  |
|---|-----------------------|-------------|-------------|-------------|-------------|------|--|--|---------------|--|-------------|--|

### Colour detection thresholds in faces and colour patches

|   |                       |             |             |             |             |                                                                                               |  |  |               |   |              |  |
|---|-----------------------|-------------|-------------|-------------|-------------|-----------------------------------------------------------------------------------------------|--|--|---------------|---|--------------|--|
| 1 | observational studies | not serious | not serious | not serious | not serious | strong association<br>all plausible residual confounding would reduce the demonstrated effect |  |  | not estimable | - | ⊕⊕⊕⊕<br>HIGH |  |
|   |                       |             |             |             |             |                                                                                               |  |  |               |   |              |  |

### A color based face detection system using multiple templates

|   |                       |                      |             |             |                      |                                                                         |  |  |               |  |                  |  |
|---|-----------------------|----------------------|-------------|-------------|----------------------|-------------------------------------------------------------------------|--|--|---------------|--|------------------|--|
| 1 | observational studies | serious <sup>d</sup> | not serious | not serious | serious <sup>e</sup> | all plausible residual confounding would reduce the demonstrated effect |  |  | not estimable |  | ⊕○○○<br>VERY LOW |  |
|---|-----------------------|----------------------|-------------|-------------|----------------------|-------------------------------------------------------------------------|--|--|---------------|--|------------------|--|

**CI:** Confidence interval

### Explanations

- a. Different age groups and genders have varying tolerance to colour changes. Such changes were not controlled in the study
- b. An unclear description of the custom-made jig The smartphone used, silicone material and pigments used were conveniently selected
- c. The study design cannot be reproduced for dental prostheses
- d. The ethnic groups were conveniently selected for the study
- e. RGB colour space is not reliable for accurate facial skin tone identification.

**Question:** Digital photo compared to conventional technique in maxillofacial prosthesis

| Certainty assessment |              |              |               |              |             |                      | № of patients |                        | Effect            |                   | Certainty | Importance |
|----------------------|--------------|--------------|---------------|--------------|-------------|----------------------|---------------|------------------------|-------------------|-------------------|-----------|------------|
| № of studies         | Study design | Risk of bias | Inconsistency | Indirectness | Imprecision | Other considerations | Digital photo | conventional technique | Relative (95% CI) | Absolute (95% CI) |           |            |

### Developing a 3D colour image reproduction system for additive manufacturing of facial prostheses

|   |                       |             |             |             |                      |                    |  |  |               |  |             |  |
|---|-----------------------|-------------|-------------|-------------|----------------------|--------------------|--|--|---------------|--|-------------|--|
| 1 | observational studies | not serious | not serious | not serious | serious <sup>a</sup> | strong association |  |  | not estimable |  | ⊕⊕○○<br>LOW |  |
|---|-----------------------|-------------|-------------|-------------|----------------------|--------------------|--|--|---------------|--|-------------|--|

**Color reproduction for advanced manufacture of soft tissue prostheses**

|   |                       |             |             |             |                      |      |  |  |               |  |                  |  |
|---|-----------------------|-------------|-------------|-------------|----------------------|------|--|--|---------------|--|------------------|--|
| 1 | observational studies | not serious | not serious | not serious | serious <sup>b</sup> | none |  |  | not estimable |  | ⊕○○○<br>VERY LOW |  |
|---|-----------------------|-------------|-------------|-------------|----------------------|------|--|--|---------------|--|------------------|--|

**An a priori Shading Correction Technique for Contact Imaging Devices**

|   |                       |                      |             |             |                      |      |  |  |               |  |                  |  |
|---|-----------------------|----------------------|-------------|-------------|----------------------|------|--|--|---------------|--|------------------|--|
| 1 | observational studies | serious <sup>b</sup> | not serious | not serious | serious <sup>c</sup> | none |  |  | not estimable |  | ⊕○○○<br>VERY LOW |  |
|---|-----------------------|----------------------|-------------|-------------|----------------------|------|--|--|---------------|--|------------------|--|

**A device for the color measurement and detection of spots on the skin**

|   |                       |                      |             |             |             |                                                                         |  |  |               |  |             |  |
|---|-----------------------|----------------------|-------------|-------------|-------------|-------------------------------------------------------------------------|--|--|---------------|--|-------------|--|
| 1 | observational studies | serious <sup>d</sup> | not serious | not serious | not serious | all plausible residual confounding would reduce the demonstrated effect |  |  | not estimable |  | ⊕⊕○○<br>LOW |  |
|---|-----------------------|----------------------|-------------|-------------|-------------|-------------------------------------------------------------------------|--|--|---------------|--|-------------|--|

**Ocular Defect Rehabilitation Using Photography and Digital Imaging: A Clinical Report**

|   |                       |                      |             |             |             |                    |  |   |   |   |             |  |
|---|-----------------------|----------------------|-------------|-------------|-------------|--------------------|--|---|---|---|-------------|--|
| 1 | observational studies | serious <sup>e</sup> | not serious | not serious | not serious | strong association |  | - | - | - | ⊕⊕○○<br>LOW |  |
|---|-----------------------|----------------------|-------------|-------------|-------------|--------------------|--|---|---|---|-------------|--|

**Digital capture, design, and manufacturing of a facial prosthesis: Clinical report on a pediatric patient**

|   |                       |                      |             |             |                      |      |  |   |   |   |                  |  |
|---|-----------------------|----------------------|-------------|-------------|----------------------|------|--|---|---|---|------------------|--|
| 1 | observational studies | serious <sup>f</sup> | not serious | not serious | serious <sup>g</sup> | none |  | - | - | - | ⊕○○○<br>VERY LOW |  |
|---|-----------------------|----------------------|-------------|-------------|----------------------|------|--|---|---|---|------------------|--|



## Prosthetic Rehabilitation of Ocular Defect Using Digital Photography: A Case Report

|   |                       |             |             |             |             |                                                                         |  |   |   |   |                  |  |
|---|-----------------------|-------------|-------------|-------------|-------------|-------------------------------------------------------------------------|--|---|---|---|------------------|--|
| 1 | observational studies | not serious | not serious | not serious | not serious | all plausible residual confounding would reduce the demonstrated effect |  | - | - | - | ⊕⊕⊕○<br>MODERATE |  |
|---|-----------------------|-------------|-------------|-------------|-------------|-------------------------------------------------------------------------|--|---|---|---|------------------|--|

**CI:** Confidence interval

### Explanations

- Only two prostheses; one nose and one ear were validated with this proposed technique
- For proper shading correction is based on adequate lighting condition and standardisation. The current study made no mention of light control.
- The device accuracy was limited to an area of between 1 and 300mm<sup>2</sup> due to lack of illuminance of the edges.
- The samples were not properly defined. The device accuracy was limited to an area of between 1 and 300mm<sup>2</sup> due to lack of illuminance of the edges.
- Incomplete camera details were provided. Duplication of the iris depends upon quality of the printer ink, printer paper type and skills to use the software including digital photography technique
- Shade mixing relied predominantly on conventional visual perception
- Color matched with utilizing visual perception

# Prosthodontics

**Question:** Digital photo compared to conventional technique in prosthodontics

| Certainty assessment |              |              |               |              |             |                      | № of patients |                        | Effect            |                   | Certainty | Importance |
|----------------------|--------------|--------------|---------------|--------------|-------------|----------------------|---------------|------------------------|-------------------|-------------------|-----------|------------|
| № of studies         | Study design | Risk of bias | Inconsistency | Indirectness | Imprecision | Other considerations | Digital photo | conventional technique | Relative (95% CI) | Absolute (95% CI) |           |            |

## Quantitative Evaluation of Masticatory Performance with Two-Color Mixing Ability Test: Development of a New Digital Method

|   |                       |                      |             |             |             |                    |  |  |               |  |             |  |
|---|-----------------------|----------------------|-------------|-------------|-------------|--------------------|--|--|---------------|--|-------------|--|
| 1 | observational studies | serious <sup>a</sup> | not serious | not serious | not serious | strong association |  |  | not estimable |  | ⊕⊕○○<br>LOW |  |
|---|-----------------------|----------------------|-------------|-------------|-------------|--------------------|--|--|---------------|--|-------------|--|

## Evaluation of variation in shade in metal-ceramic restoration from the shade tab

|   |                       |                      |             |             |             |                                                                         |  |  |               |  |             |  |
|---|-----------------------|----------------------|-------------|-------------|-------------|-------------------------------------------------------------------------|--|--|---------------|--|-------------|--|
| 1 | observational studies | serious <sup>b</sup> | not serious | not serious | not serious | all plausible residual confounding would reduce the demonstrated effect |  |  | not estimable |  | ⊕⊕○○<br>LOW |  |
|---|-----------------------|----------------------|-------------|-------------|-------------|-------------------------------------------------------------------------|--|--|---------------|--|-------------|--|

### Different Materials Used as Denture Retainers and Their Colour Stability

|   |                       |             |             |             |             |      |  |  |               |  |             |  |
|---|-----------------------|-------------|-------------|-------------|-------------|------|--|--|---------------|--|-------------|--|
| 1 | observational studies | not serious | not serious | not serious | not serious | none |  |  | not estimable |  | ⊕⊕○○<br>LOW |  |
|---|-----------------------|-------------|-------------|-------------|-------------|------|--|--|---------------|--|-------------|--|

### Differences in the intensity of light-induced fluorescence emitted by resin composites

|   |                       |                      |             |             |             |                    |  |  |               |  |             |  |
|---|-----------------------|----------------------|-------------|-------------|-------------|--------------------|--|--|---------------|--|-------------|--|
| 1 | observational studies | serious <sup>c</sup> | not serious | not serious | not serious | strong association |  |  | not estimable |  | ⊕⊕○○<br>LOW |  |
|---|-----------------------|----------------------|-------------|-------------|-------------|--------------------|--|--|---------------|--|-------------|--|

### Accuracy of Three Shade-matching Devices in Replicating the Shade of Metal Ceramic Restorations: An in vitro Study

|   |                       |             |             |             |             |      |  |  |               |  |             |  |
|---|-----------------------|-------------|-------------|-------------|-------------|------|--|--|---------------|--|-------------|--|
| 1 | observational studies | not serious | not serious | not serious | not serious | none |  |  | not estimable |  | ⊕⊕○○<br>LOW |  |
|---|-----------------------|-------------|-------------|-------------|-------------|------|--|--|---------------|--|-------------|--|

### Digital image processing versus visual assessment of chewed two-colour wax in mixing ability tests

|   |                       |             |             |             |             |                                                                         |  |  |               |  |                  |  |
|---|-----------------------|-------------|-------------|-------------|-------------|-------------------------------------------------------------------------|--|--|---------------|--|------------------|--|
| 1 | observational studies | not serious | not serious | not serious | not serious | all plausible residual confounding would reduce the demonstrated effect |  |  | not estimable |  | ⊕⊕⊕○<br>MODERATE |  |
|---|-----------------------|-------------|-------------|-------------|-------------|-------------------------------------------------------------------------|--|--|---------------|--|------------------|--|

**Digital analysis of mouth rinse staining characteristics on provisional acrylic resins**

|   |                       |             |             |             |             |                                                                                               |  |  |               |  |              |  |
|---|-----------------------|-------------|-------------|-------------|-------------|-----------------------------------------------------------------------------------------------|--|--|---------------|--|--------------|--|
| 1 | observational studies | not serious | not serious | not serious | not serious | strong association<br>all plausible residual confounding would reduce the demonstrated effect |  |  | not estimable |  | ⊕⊕⊕⊕<br>HIGH |  |
|---|-----------------------|-------------|-------------|-------------|-------------|-----------------------------------------------------------------------------------------------|--|--|---------------|--|--------------|--|

**CI:** Confidence interval

**Explanations**

- a. The proposed method was not compared to any gold standard
- b. •Glazed material photographed under natural light could introduce possible reflection-based errors during photo capture. •The results could have been influenced by the porcelain thickness and metal properties
- c. •Tooth samples were conveniently selected •The blue lights present within the study contains blue lights may not be suitable for inducing highest fluorescent intensities. •The filter on QLF-D technology sometimes filters out extra wavelength resulting in greater fluorescence intensity

**Question:** Digital photo compared to conventional technique in prosthodontics

| Certainty assessment |              |              |               |              |             |                      | № of patients |                        | Effect            |                   | Certainty | Importance |
|----------------------|--------------|--------------|---------------|--------------|-------------|----------------------|---------------|------------------------|-------------------|-------------------|-----------|------------|
| № of studies         | Study design | Risk of bias | Inconsistency | Indirectness | Imprecision | Other considerations | Digital photo | conventional technique | Relative (95% CI) | Absolute (95% CI) |           |            |

**Photographic assessment of colour changes in cold and heat-cure resins**

|   |                       |                      |             |             |             |                                                                         |  |  |               |  |             |  |
|---|-----------------------|----------------------|-------------|-------------|-------------|-------------------------------------------------------------------------|--|--|---------------|--|-------------|--|
| 1 | observational studies | serious <sup>a</sup> | not serious | not serious | not serious | all plausible residual confounding would reduce the demonstrated effect |  |  | not estimable |  | ⊕⊕○○<br>LOW |  |
|---|-----------------------|----------------------|-------------|-------------|-------------|-------------------------------------------------------------------------|--|--|---------------|--|-------------|--|

**Evaluation of color and contour matching accuracy with digital photography and direct vision**

|   |                       |                      |             |             |                      |                                                                         |  |  |               |  |                       |  |
|---|-----------------------|----------------------|-------------|-------------|----------------------|-------------------------------------------------------------------------|--|--|---------------|--|-----------------------|--|
| 1 | observational studies | serious <sup>b</sup> | not serious | not serious | serious <sup>c</sup> | all plausible residual confounding would reduce the demonstrated effect |  |  | not estimable |  | ⊕○○○<br>○<br>VERY LOW |  |
|---|-----------------------|----------------------|-------------|-------------|----------------------|-------------------------------------------------------------------------|--|--|---------------|--|-----------------------|--|

### Digital Computer Matching of Tooth Color

|   |                       |             |             |             |             |                    |  |  |               |  |                  |  |
|---|-----------------------|-------------|-------------|-------------|-------------|--------------------|--|--|---------------|--|------------------|--|
| 1 | observational studies | not serious | not serious | not serious | not serious | strong association |  |  | not estimable |  | ⊕⊕⊕○<br>MODERATE |  |
|---|-----------------------|-------------|-------------|-------------|-------------|--------------------|--|--|---------------|--|------------------|--|

### Intraoral infrared color photography of radiotherapy patients

|   |                       |             |             |             |             |                                                                         |  |   |   |   |                  |  |
|---|-----------------------|-------------|-------------|-------------|-------------|-------------------------------------------------------------------------|--|---|---|---|------------------|--|
| 1 | observational studies | not serious | not serious | not serious | not serious | all plausible residual confounding would reduce the demonstrated effect |  | - | - | - | ⊕⊕⊕○<br>MODERATE |  |
|---|-----------------------|-------------|-------------|-------------|-------------|-------------------------------------------------------------------------|--|---|---|---|------------------|--|

**CI:** Confidence interval

### Explanations

- a. • Temperature control or variations were not specified
- b. • The observers had varying experience in restorative dentistry • The parameters used as standard were unclear
- c. • Incomplete camera details were provided • The lighting apparatus was not clearly defined

# Periodontics and Oral Pathology

**Question:** Digital photo compared to conventional technique in periodontology

| Certainty assessment |              |              |               |              |             |                      | № of patients |                        | Effect            |                   | Certainty | Importance |
|----------------------|--------------|--------------|---------------|--------------|-------------|----------------------|---------------|------------------------|-------------------|-------------------|-----------|------------|
| № of studies         | Study design | Risk of bias | Inconsistency | Indirectness | Imprecision | Other considerations | Digital photo | conventional technique | Relative (95% CI) | Absolute (95% CI) |           |            |

## FRAME STITCHING IN HUMAN ORAL CAVITY ENVIRONMENT USING INTRAORAL CAMERA

|   |                       |                      |             |             |             |                                                                         |  |  |               |  |             |  |
|---|-----------------------|----------------------|-------------|-------------|-------------|-------------------------------------------------------------------------|--|--|---------------|--|-------------|--|
| 1 | observational studies | serious <sup>a</sup> | not serious | not serious | not serious | all plausible residual confounding would reduce the demonstrated effect |  |  | not estimable |  | ⊕⊕○○<br>LOW |  |
|---|-----------------------|----------------------|-------------|-------------|-------------|-------------------------------------------------------------------------|--|--|---------------|--|-------------|--|

## Photometric CIELAB Analysis of the Gingiva: A Novel Approach to Assess Response to Periodontal Therapy

|   |                       |                      |             |             |             |                                                                         |  |  |               |  |             |  |
|---|-----------------------|----------------------|-------------|-------------|-------------|-------------------------------------------------------------------------|--|--|---------------|--|-------------|--|
| 1 | observational studies | serious <sup>b</sup> | not serious | not serious | not serious | all plausible residual confounding would reduce the demonstrated effect |  |  | not estimable |  | ⊕⊕○○<br>LOW |  |
|---|-----------------------|----------------------|-------------|-------------|-------------|-------------------------------------------------------------------------|--|--|---------------|--|-------------|--|

**CI:** Confidence interval

### Explanations

- a. •SFS cannot always provide accurate information on the surface normal. •The study relied on software-based simulations of intraoral lighting conditions
- b. •A single tooth was analysed which might not justly reflect the rest of the dentition •Only one race of samples was selected •White balance and colour calibration methods were not mentioned •Software used for color evaluation was not mentioned

**Question:** Digital photo compared to conventional technique in oral pathology

| Certainty assessment |              |              |               |              |             |                      | Nº of patients |                        | Effect            |                   | Certainty | Importance |
|----------------------|--------------|--------------|---------------|--------------|-------------|----------------------|----------------|------------------------|-------------------|-------------------|-----------|------------|
| Nº of studies        | Study design | Risk of bias | Inconsistency | Indirectness | Imprecision | Other considerations | Digital photo  | conventional technique | Relative (95% CI) | Absolute (95% CI) |           |            |

**A computer-aided automated methodology for the detection and classification of occlusal caries from photographic color images**

|   |                       |                      |             |             |             |                    |                |  |               |  |             |  |
|---|-----------------------|----------------------|-------------|-------------|-------------|--------------------|----------------|--|---------------|--|-------------|--|
| 1 | observational studies | serious <sup>a</sup> | not serious | not serious | not serious | strong association | 68/103 (66.0%) |  | not estimable |  | ⊕⊕○○<br>LOW |  |
|---|-----------------------|----------------------|-------------|-------------|-------------|--------------------|----------------|--|---------------|--|-------------|--|



**Clinical color intensity of white spot lesions might be a better predictor of enamel demineralization depth than traditional clinical grading**

|   |                       |                      |             |             |             |                                                                                               |  |  |               |  |                  |  |
|---|-----------------------|----------------------|-------------|-------------|-------------|-----------------------------------------------------------------------------------------------|--|--|---------------|--|------------------|--|
| 1 | observational studies | serious <sup>b</sup> | not serious | not serious | not serious | strong association<br>all plausible residual confounding would reduce the demonstrated effect |  |  | not estimable |  | ⊕⊕⊕○<br>MODERATE |  |
|---|-----------------------|----------------------|-------------|-------------|-------------|-----------------------------------------------------------------------------------------------|--|--|---------------|--|------------------|--|

**Evaluating the objectivity of caries removal with a caries detector dye using color evaluation and PCR**

|   |                       |                      |             |             |             |                                                                                               |  |  |               |  |                  |  |
|---|-----------------------|----------------------|-------------|-------------|-------------|-----------------------------------------------------------------------------------------------|--|--|---------------|--|------------------|--|
| 1 | observational studies | serious <sup>c</sup> | not serious | not serious | not serious | strong association<br>all plausible residual confounding would reduce the demonstrated effect |  |  | not estimable |  | ⊕⊕⊕○<br>MODERATE |  |
|---|-----------------------|----------------------|-------------|-------------|-------------|-----------------------------------------------------------------------------------------------|--|--|---------------|--|------------------|--|

**CI:** Confidence interval

**Explanations**

a. Different camera and setups were used for in-vivo and in-vitro photographs

b. The outcomes were influenced by patient dependent variables such as brushing habits, that were not controlled in the study

c. •only carious molar teeth were selected •The samples were not equally distributed among the operators •The samples were selected based on operators' visual judgement

# Orthodontics

**Question:** Digital photo compared to conventional technique for orthodontics and Dentofacial orthopedics

| Certainty assessment |              |              |               |              |             |                      | Nº of patients |                        | Effect            |                   | Certainty | Importance |
|----------------------|--------------|--------------|---------------|--------------|-------------|----------------------|----------------|------------------------|-------------------|-------------------|-----------|------------|
| Nº of studies        | Study design | Risk of bias | Inconsistency | Indirectness | Imprecision | Other considerations | Digital photo  | conventional technique | Relative (95% CI) | Absolute (95% CI) |           |            |

**Measuring facial symmetry: a perception-based approach using 3D shape and color**

|   |                       |                      |             |             |             |                                                                                            |  |  |               |  |                  |  |
|---|-----------------------|----------------------|-------------|-------------|-------------|--------------------------------------------------------------------------------------------|--|--|---------------|--|------------------|--|
| 1 | observational studies | serious <sup>a</sup> | not serious | not serious | not serious | strong association all plausible residual confounding would reduce the demonstrated effect |  |  | not estimable |  | ⊕⊕⊕○<br>MODERATE |  |
|---|-----------------------|----------------------|-------------|-------------|-------------|--------------------------------------------------------------------------------------------|--|--|---------------|--|------------------|--|

**Three-Dimensional Color Maps: A Novel Tool for Assessing Craniofacial Changes**

|   |                       |                      |             |             |             |      |  |   |   |   |                  |  |
|---|-----------------------|----------------------|-------------|-------------|-------------|------|--|---|---|---|------------------|--|
| 1 | observational studies | serious <sup>b</sup> | not serious | not serious | not serious | none |  | - | - | - | ⊕○○○<br>VERY LOW |  |
|---|-----------------------|----------------------|-------------|-------------|-------------|------|--|---|---|---|------------------|--|

### How Accurate Are the Fusion of Cone-Beam CT and 3-D Stereophotographic Images?

|   |                       |             |             |             |             |                                                                                               |  |  |               |  |              |  |
|---|-----------------------|-------------|-------------|-------------|-------------|-----------------------------------------------------------------------------------------------|--|--|---------------|--|--------------|--|
| 1 | observational studies | not serious | not serious | not serious | not serious | strong association<br>all plausible residual confounding would reduce the demonstrated effect |  |  | not estimable |  | ⊕⊕⊕⊕<br>HIGH |  |
|---|-----------------------|-------------|-------------|-------------|-------------|-----------------------------------------------------------------------------------------------|--|--|---------------|--|--------------|--|

### Canine substitution for missing maxillary lateral incisors: The influence of canine morphology, size, and shade on perceptions of smile attractiveness

|   |                       |                      |             |             |             |                    |  |  |               |  |             |  |
|---|-----------------------|----------------------|-------------|-------------|-------------|--------------------|--|--|---------------|--|-------------|--|
| 1 | observational studies | serious <sup>c</sup> | not serious | not serious | not serious | strong association |  |  | not estimable |  | ⊕⊕○○<br>LOW |  |
|---|-----------------------|----------------------|-------------|-------------|-------------|--------------------|--|--|---------------|--|-------------|--|

**CI:** Confidence interval

### Explanations

- a. • Above hairline and ear were excluded by indicating as a complex surface to record the details • There has been a selective age range was given who used as an observer
- b. • Author describe that majority of the software for color maps is not scientifically validated in clinical trials
- c. • 120 observers were selected as participants including orthodontists, dentist and lay people • For image patients having hypodontia were selected

## Table S15

**Joanna Briggs Institute (JBI) critical  
appraisal results**

# **Colorimetry in Dentistry**

# JBI CRITICAL APPRAISAL CHECKLIST FOR CASE REPORTS

Reviewer \_\_\_\_\_ Date 1.11.2020

Author Albert et al Year 2019 Record Number 1

|                                                                                         | Yes                                 | No                                  | Unclear                             | Not applicable           |
|-----------------------------------------------------------------------------------------|-------------------------------------|-------------------------------------|-------------------------------------|--------------------------|
| 1. Were patient's demographic characteristics clearly described?                        | <input type="checkbox"/>            | <input type="checkbox"/>            | <input checked="" type="checkbox"/> | <input type="checkbox"/> |
| 2. Was the patient's history clearly described and presented as a timeline?             | <input type="checkbox"/>            | <input type="checkbox"/>            | <input checked="" type="checkbox"/> | <input type="checkbox"/> |
| 3. Was the current clinical condition of the patient on presentation clearly described? | <input type="checkbox"/>            | <input type="checkbox"/>            | <input checked="" type="checkbox"/> | <input type="checkbox"/> |
| 4. Were diagnostic tests or assessment methods and the results clearly described?       | <input type="checkbox"/>            | <input type="checkbox"/>            | <input checked="" type="checkbox"/> | <input type="checkbox"/> |
| 5. Was the intervention(s) or treatment procedure(s) clearly described?                 | <input checked="" type="checkbox"/> | <input type="checkbox"/>            | <input type="checkbox"/>            | <input type="checkbox"/> |
| 6. Was the post-intervention clinical condition clearly described?                      | <input type="checkbox"/>            | <input type="checkbox"/>            | <input checked="" type="checkbox"/> | <input type="checkbox"/> |
| 7. Were adverse events (harms) or unanticipated events identified and described?        | <input type="checkbox"/>            | <input checked="" type="checkbox"/> | <input type="checkbox"/>            | <input type="checkbox"/> |
| 8. Does the case report provide takeaway lessons?                                       | <input checked="" type="checkbox"/> | <input type="checkbox"/>            | <input type="checkbox"/>            | <input type="checkbox"/> |

Overall appraisal: Include ☒ Exclude ☐ Seek further info ☐

Comments (Including reason for exclusion)

---

---

---

# **JBI CRITICAL APPRAISAL CHECKLIST FOR QUASI-EXPERIMENTAL STUDIES**

Reviewer \_\_\_\_\_ Date 11.11.2020

Author Culic et al. Year 2014 Record Number 2

|                                                                                                                                             | Yes                                 | No                                  | Unclear                  | Not applicable                      |
|---------------------------------------------------------------------------------------------------------------------------------------------|-------------------------------------|-------------------------------------|--------------------------|-------------------------------------|
| 1. Is it clear in the study what is the 'cause' and what is the 'effect' (i.e. there is no confusion about which variable comes first)?     | <input checked="" type="checkbox"/> | <input type="checkbox"/>            | <input type="checkbox"/> | <input type="checkbox"/>            |
| 2. Were the participants included in any comparisons similar?                                                                               | <input checked="" type="checkbox"/> | <input type="checkbox"/>            | <input type="checkbox"/> | <input type="checkbox"/>            |
| 3. Were the participants included in any comparisons receiving similar treatment/care, other than the exposure or intervention of interest? | <input checked="" type="checkbox"/> | <input type="checkbox"/>            | <input type="checkbox"/> | <input type="checkbox"/>            |
| 4. Was there a control group?                                                                                                               | <input type="checkbox"/>            | <input checked="" type="checkbox"/> | <input type="checkbox"/> | <input type="checkbox"/>            |
| 5. Were there multiple measurements of the outcome both pre and post the intervention/exposure?                                             | <input type="checkbox"/>            | <input checked="" type="checkbox"/> | <input type="checkbox"/> | <input type="checkbox"/>            |
| 6. Was follow up complete and if not, were differences between groups in terms of their follow up adequately described and analyzed?        | <input type="checkbox"/>            | <input type="checkbox"/>            | <input type="checkbox"/> | <input checked="" type="checkbox"/> |
| 7. Were the outcomes of participants included in any comparisons measured in the same way?                                                  | <input checked="" type="checkbox"/> | <input type="checkbox"/>            | <input type="checkbox"/> | <input type="checkbox"/>            |
| 8. Were outcomes measured in a reliable way?                                                                                                | <input checked="" type="checkbox"/> | <input type="checkbox"/>            | <input type="checkbox"/> | <input type="checkbox"/>            |
| 9. Was appropriate statistical analysis used?                                                                                               | <input checked="" type="checkbox"/> | <input type="checkbox"/>            | <input type="checkbox"/> | <input type="checkbox"/>            |

Overall appraisal:    Include ☒    Exclude ☐    Seek further info ☐

Comments (Including reason for exclusion)



# **JBI CRITICAL APPRAISAL CHECKLIST FOR QUASI-EXPERIMENTAL STUDIES**

Reviewer \_\_\_\_\_ Date 11.11.2020

Author Carney et al Year 2016 Record Number \_\_\_\_\_

|                                                                                                                                             | Yes                                 | No                                  | Unclear                             | Not applicable                      |
|---------------------------------------------------------------------------------------------------------------------------------------------|-------------------------------------|-------------------------------------|-------------------------------------|-------------------------------------|
| 1. Is it clear in the study what is the 'cause' and what is the 'effect' (i.e. there is no confusion about which variable comes first)?     | <input checked="" type="checkbox"/> | <input type="checkbox"/>            | <input type="checkbox"/>            | <input type="checkbox"/>            |
| 2. Were the participants included in any comparisons similar?                                                                               | <input checked="" type="checkbox"/> | <input type="checkbox"/>            | <input type="checkbox"/>            | <input type="checkbox"/>            |
| 3. Were the participants included in any comparisons receiving similar treatment/care, other than the exposure or intervention of interest? | <input type="checkbox"/>            | <input type="checkbox"/>            | <input checked="" type="checkbox"/> | <input type="checkbox"/>            |
| 4. Was there a control group?                                                                                                               | <input type="checkbox"/>            | <input checked="" type="checkbox"/> | <input type="checkbox"/>            | <input type="checkbox"/>            |
| 5. Were there multiple measurements of the outcome both pre and post the intervention/exposure?                                             | <input type="checkbox"/>            | <input checked="" type="checkbox"/> | <input type="checkbox"/>            | <input type="checkbox"/>            |
| 6. Was follow up complete and if not, were differences between groups in terms of their follow up adequately described and analyzed?        | <input type="checkbox"/>            | <input type="checkbox"/>            | <input type="checkbox"/>            | <input checked="" type="checkbox"/> |
| 7. Were the outcomes of participants included in any comparisons measured in the same way?                                                  | <input checked="" type="checkbox"/> | <input type="checkbox"/>            | <input type="checkbox"/>            | <input type="checkbox"/>            |
| 8. Were outcomes measured in a reliable way?                                                                                                | <input checked="" type="checkbox"/> | <input type="checkbox"/>            | <input type="checkbox"/>            | <input type="checkbox"/>            |
| 9. Was appropriate statistical analysis used?                                                                                               | <input type="checkbox"/>            | <input type="checkbox"/>            | <input checked="" type="checkbox"/> | <input type="checkbox"/>            |

Overall appraisal:    Include ☒    Exclude ☐    Seek further info ☐

Comments (Including reason for exclusion)

---



---



---

# **JBI CRITICAL APPRAISAL CHECKLIST FOR QUASI-EXPERIMENTAL STUDIES**

Reviewer \_\_\_\_\_ Date 11.11.2020

Author Denissen et al Year 2010 Record Number \_\_\_\_\_

|                                                                                                                                             | Yes                                 | No                                  | Unclear                             | Not applicable           |
|---------------------------------------------------------------------------------------------------------------------------------------------|-------------------------------------|-------------------------------------|-------------------------------------|--------------------------|
| 1. Is it clear in the study what is the 'cause' and what is the 'effect' (i.e. there is no confusion about which variable comes first)?     | <input checked="" type="checkbox"/> | <input type="checkbox"/>            | <input type="checkbox"/>            | <input type="checkbox"/> |
| 2. Were the participants included in any comparisons similar?                                                                               | <input checked="" type="checkbox"/> | <input type="checkbox"/>            | <input type="checkbox"/>            | <input type="checkbox"/> |
| 3. Were the participants included in any comparisons receiving similar treatment/care, other than the exposure or intervention of interest? | <input type="checkbox"/>            | <input checked="" type="checkbox"/> | <input type="checkbox"/>            | <input type="checkbox"/> |
| 4. Was there a control group?                                                                                                               | <input type="checkbox"/>            | <input checked="" type="checkbox"/> | <input type="checkbox"/>            | <input type="checkbox"/> |
| 5. Were there multiple measurements of the outcome both pre and post the intervention/exposure?                                             | <input type="checkbox"/>            | <input checked="" type="checkbox"/> | <input type="checkbox"/>            | <input type="checkbox"/> |
| 6. Was follow up complete and if not, were differences between groups in terms of their follow up adequately described and analyzed?        | <input type="checkbox"/>            | <input type="checkbox"/>            | <input checked="" type="checkbox"/> | <input type="checkbox"/> |
| 7. Were the outcomes of participants included in any comparisons measured in the same way?                                                  | <input checked="" type="checkbox"/> | <input type="checkbox"/>            | <input type="checkbox"/>            | <input type="checkbox"/> |
| 8. Were outcomes measured in a reliable way?                                                                                                | <input checked="" type="checkbox"/> | <input type="checkbox"/>            | <input type="checkbox"/>            | <input type="checkbox"/> |
| 9. Was appropriate statistical analysis used?                                                                                               | <input checked="" type="checkbox"/> | <input type="checkbox"/>            | <input type="checkbox"/>            | <input type="checkbox"/> |

Overall appraisal:    Include ☒    Exclude ☐    Seek further info ☐

Comments (Including reason for exclusion)

---



---



---

# **JBI CRITICAL APPRAISAL CHECKLIST FOR ANALYTICAL CROSS SECTIONAL STUDIES**

Reviewer \_\_\_\_\_ Date 12.11.2020

Author Murro et al Year 2019 Record Number \_\_\_\_\_

|                                                                             | Yes                                 | No                                  | Unclear                             | Not<br>applicable        |
|-----------------------------------------------------------------------------|-------------------------------------|-------------------------------------|-------------------------------------|--------------------------|
| 1. Were the criteria for inclusion in the sample clearly defined?           | <input checked="" type="checkbox"/> | <input type="checkbox"/>            | <input type="checkbox"/>            | <input type="checkbox"/> |
| 2. Were the study subjects and the setting described in detail?             | <input type="checkbox"/>            | <input type="checkbox"/>            | <input checked="" type="checkbox"/> | <input type="checkbox"/> |
| 3. Was the exposure measured in a valid and reliable way?                   | <input checked="" type="checkbox"/> | <input type="checkbox"/>            | <input type="checkbox"/>            | <input type="checkbox"/> |
| 4. Were objective, standard criteria used for measurement of the condition? | <input checked="" type="checkbox"/> | <input type="checkbox"/>            | <input type="checkbox"/>            | <input type="checkbox"/> |
| 5. Were confounding factors identified?                                     | <input type="checkbox"/>            | <input type="checkbox"/>            | <input checked="" type="checkbox"/> | <input type="checkbox"/> |
| 6. Were strategies to deal with confounding factors stated?                 | <input type="checkbox"/>            | <input type="checkbox"/>            | <input checked="" type="checkbox"/> | <input type="checkbox"/> |
| 7. Were the outcomes measured in a valid and reliable way?                  | <input type="checkbox"/>            | <input checked="" type="checkbox"/> | <input type="checkbox"/>            | <input type="checkbox"/> |
| 8. Was appropriate statistical analysis used?                               | <input checked="" type="checkbox"/> | <input type="checkbox"/>            | <input type="checkbox"/>            | <input type="checkbox"/> |

Overall appraisal: Include ☒ Exclude ☐ Seek further info ☐

Comments (Including reason for exclusion)

---



---



---

# **JBI CRITICAL APPRAISAL CHECKLIST FOR CASE CONTROL STUDIES**

Reviewer \_\_\_\_\_ Date 15.11.2020

Author Gurrea et al. Year 2016 Record Number \_\_\_\_\_

|                                                                                                                  | Yes                                 | No                       | Unclear                             | Not applicable                      |
|------------------------------------------------------------------------------------------------------------------|-------------------------------------|--------------------------|-------------------------------------|-------------------------------------|
| 1. Were the groups comparable other than the presence of disease in cases or the absence of disease in controls? | <input type="checkbox"/>            | <input type="checkbox"/> | <input type="checkbox"/>            | <input checked="" type="checkbox"/> |
| 2. Were cases and controls matched appropriately?                                                                | <input checked="" type="checkbox"/> | <input type="checkbox"/> | <input type="checkbox"/>            | <input type="checkbox"/>            |
| 3. Were the same criteria used for identification of cases and controls?                                         | <input type="checkbox"/>            | <input type="checkbox"/> | <input checked="" type="checkbox"/> | <input type="checkbox"/>            |
| 4. Was exposure measured in a standard, valid and reliable way?                                                  | <input checked="" type="checkbox"/> | <input type="checkbox"/> | <input type="checkbox"/>            | <input type="checkbox"/>            |
| 5. Was exposure measured in the same way for cases and controls?                                                 | <input checked="" type="checkbox"/> | <input type="checkbox"/> | <input type="checkbox"/>            | <input type="checkbox"/>            |
| 6. Were confounding factors identified?                                                                          | <input checked="" type="checkbox"/> | <input type="checkbox"/> | <input type="checkbox"/>            | <input type="checkbox"/>            |
| 7. Were strategies to deal with confounding factors stated?                                                      | <input checked="" type="checkbox"/> | <input type="checkbox"/> | <input type="checkbox"/>            | <input type="checkbox"/>            |
| 8. Were outcomes assessed in a standard, valid and reliable way for cases and controls?                          | <input checked="" type="checkbox"/> | <input type="checkbox"/> | <input type="checkbox"/>            | <input type="checkbox"/>            |
| 9. Was the exposure period of interest long enough to be meaningful?                                             | <input type="checkbox"/>            | <input type="checkbox"/> | <input type="checkbox"/>            | <input checked="" type="checkbox"/> |
| 10. Was appropriate statistical analysis used?                                                                   | <input checked="" type="checkbox"/> | <input type="checkbox"/> | <input type="checkbox"/>            | <input type="checkbox"/>            |

Overall appraisal:    Include ☒    Exclude ☐    Seek further info ☐

Comments (Including reason for exclusion)

---



---



---

# **JBI CRITICAL APPRAISAL CHECKLIST FOR QUASI-EXPERIMENTAL STUDIES**

Reviewer \_\_\_\_\_ Date 15.11.2020

Author Hung He et al. Year 2019 Record Number \_\_\_\_\_

|                                                                                                                                             | Yes                                 | No                                  | Unclear                  | Not applicable                      |
|---------------------------------------------------------------------------------------------------------------------------------------------|-------------------------------------|-------------------------------------|--------------------------|-------------------------------------|
| 1. Is it clear in the study what is the 'cause' and what is the 'effect' (i.e. there is no confusion about which variable comes first)?     | <input checked="" type="checkbox"/> | <input type="checkbox"/>            | <input type="checkbox"/> | <input type="checkbox"/>            |
| 2. Were the participants included in any comparisons similar?                                                                               | <input checked="" type="checkbox"/> | <input type="checkbox"/>            | <input type="checkbox"/> | <input type="checkbox"/>            |
| 3. Were the participants included in any comparisons receiving similar treatment/care, other than the exposure or intervention of interest? | <input checked="" type="checkbox"/> | <input type="checkbox"/>            | <input type="checkbox"/> | <input type="checkbox"/>            |
| 4. Was there a control group?                                                                                                               | <input type="checkbox"/>            | <input checked="" type="checkbox"/> | <input type="checkbox"/> | <input type="checkbox"/>            |
| 5. Were there multiple measurements of the outcome both pre and post the intervention/exposure?                                             | <input checked="" type="checkbox"/> | <input type="checkbox"/>            | <input type="checkbox"/> | <input type="checkbox"/>            |
| 6. Was follow up complete and if not, were differences between groups in terms of their follow up adequately described and analyzed?        | <input type="checkbox"/>            | <input type="checkbox"/>            | <input type="checkbox"/> | <input checked="" type="checkbox"/> |
| 7. Were the outcomes of participants included in any comparisons measured in the same way?                                                  | <input checked="" type="checkbox"/> | <input type="checkbox"/>            | <input type="checkbox"/> | <input type="checkbox"/>            |
| 8. Were outcomes measured in a reliable way?                                                                                                | <input checked="" type="checkbox"/> | <input type="checkbox"/>            | <input type="checkbox"/> | <input type="checkbox"/>            |
| 9. Was appropriate statistical analysis used?                                                                                               | <input checked="" type="checkbox"/> | <input type="checkbox"/>            | <input type="checkbox"/> | <input type="checkbox"/>            |

Overall appraisal: Include ☒ Exclude ☐ Seek further info ☐

Comments (Including reason for exclusion)

---



---



---

# **JBI CRITICAL APPRAISAL CHECKLIST FOR QUASI-EXPERIMENTAL STUDIES**

Reviewer \_\_\_\_\_ Date 15.11.2020

Author Hein et al. Year 2016 Record Number \_\_\_\_\_

|                                                                                                                                             | Yes                                 | No                                  | Unclear                             | Not applicable                      |
|---------------------------------------------------------------------------------------------------------------------------------------------|-------------------------------------|-------------------------------------|-------------------------------------|-------------------------------------|
| 1. Is it clear in the study what is the 'cause' and what is the 'effect' (i.e. there is no confusion about which variable comes first)?     | <input type="checkbox"/>            | <input type="checkbox"/>            | <input checked="" type="checkbox"/> | <input type="checkbox"/>            |
| 2. Were the participants included in any comparisons similar?                                                                               | <input checked="" type="checkbox"/> | <input type="checkbox"/>            | <input type="checkbox"/>            | <input type="checkbox"/>            |
| 3. Were the participants included in any comparisons receiving similar treatment/care, other than the exposure or intervention of interest? | <input checked="" type="checkbox"/> | <input type="checkbox"/>            | <input type="checkbox"/>            | <input type="checkbox"/>            |
| 4. Was there a control group?                                                                                                               | <input type="checkbox"/>            | <input checked="" type="checkbox"/> | <input type="checkbox"/>            | <input type="checkbox"/>            |
| 5. Were there multiple measurements of the outcome both pre and post the intervention/exposure?                                             | <input type="checkbox"/>            | <input checked="" type="checkbox"/> | <input type="checkbox"/>            | <input type="checkbox"/>            |
| 6. Was follow up complete and if not, were differences between groups in terms of their follow up adequately described and analyzed?        | <input type="checkbox"/>            | <input type="checkbox"/>            | <input type="checkbox"/>            | <input checked="" type="checkbox"/> |
| 7. Were the outcomes of participants included in any comparisons measured in the same way?                                                  | <input checked="" type="checkbox"/> | <input type="checkbox"/>            | <input type="checkbox"/>            | <input type="checkbox"/>            |
| 8. Were outcomes measured in a reliable way?                                                                                                | <input checked="" type="checkbox"/> | <input type="checkbox"/>            | <input type="checkbox"/>            | <input type="checkbox"/>            |
| 9. Was appropriate statistical analysis used?                                                                                               | <input checked="" type="checkbox"/> | <input type="checkbox"/>            | <input type="checkbox"/>            | <input type="checkbox"/>            |

Overall appraisal: Include ☒ Exclude ☐ Seek further info ☐

Comments (Including reason for exclusion)

---



---



---

# **JBI CRITICAL APPRAISAL CHECKLIST FOR ANALYTICAL CROSS SECTIONAL STUDIES**

Reviewer \_\_\_\_\_ Date 16.11.2020

Author Labban et al. Year 2017 Record Number \_\_\_\_\_

|                                                                             | Yes                                 | No                       | Unclear                  | Not<br>applicable        |
|-----------------------------------------------------------------------------|-------------------------------------|--------------------------|--------------------------|--------------------------|
| 1. Were the criteria for inclusion in the sample clearly defined?           | <input checked="" type="checkbox"/> | <input type="checkbox"/> | <input type="checkbox"/> | <input type="checkbox"/> |
| 2. Were the study subjects and the setting described in detail?             | <input checked="" type="checkbox"/> | <input type="checkbox"/> | <input type="checkbox"/> | <input type="checkbox"/> |
| 3. Was the exposure measured in a valid and reliable way?                   | <input checked="" type="checkbox"/> | <input type="checkbox"/> | <input type="checkbox"/> | <input type="checkbox"/> |
| 4. Were objective, standard criteria used for measurement of the condition? | <input checked="" type="checkbox"/> | <input type="checkbox"/> | <input type="checkbox"/> | <input type="checkbox"/> |
| 5. Were confounding factors identified?                                     | <input checked="" type="checkbox"/> | <input type="checkbox"/> | <input type="checkbox"/> | <input type="checkbox"/> |
| 6. Were strategies to deal with confounding factors stated?                 | <input checked="" type="checkbox"/> | <input type="checkbox"/> | <input type="checkbox"/> | <input type="checkbox"/> |
| 7. Were the outcomes measured in a valid and reliable way?                  | <input checked="" type="checkbox"/> | <input type="checkbox"/> | <input type="checkbox"/> | <input type="checkbox"/> |
| 8. Was appropriate statistical analysis used?                               | <input checked="" type="checkbox"/> | <input type="checkbox"/> | <input type="checkbox"/> | <input type="checkbox"/> |

Overall appraisal:    Include ☒    Exclude ☐    Seek further info ☐

Comments (Including reason for exclusion)

---



---



---

# **JBI CRITICAL APPRAISAL CHECKLIST FOR ANALYTICAL CROSS SECTIONAL STUDIES**

Reviewer \_\_\_\_\_ Date 16.11.2020

Author Lam et al Year 2018 Record Number \_\_\_\_\_

|                                                                             | Yes                                 | No                       | Unclear                             | Not<br>applicable                   |
|-----------------------------------------------------------------------------|-------------------------------------|--------------------------|-------------------------------------|-------------------------------------|
| 1. Were the criteria for inclusion in the sample clearly defined?           | <input checked="" type="checkbox"/> | <input type="checkbox"/> | <input type="checkbox"/>            | <input type="checkbox"/>            |
| 2. Were the study subjects and the setting described in detail?             | <input checked="" type="checkbox"/> | <input type="checkbox"/> | <input type="checkbox"/>            | <input type="checkbox"/>            |
| 3. Was the exposure measured in a valid and reliable way?                   | <input checked="" type="checkbox"/> | <input type="checkbox"/> | <input type="checkbox"/>            | <input type="checkbox"/>            |
| 4. Were objective, standard criteria used for measurement of the condition? | <input checked="" type="checkbox"/> | <input type="checkbox"/> | <input type="checkbox"/>            | <input type="checkbox"/>            |
| 5. Were confounding factors identified?                                     | <input type="checkbox"/>            | <input type="checkbox"/> | <input checked="" type="checkbox"/> | <input type="checkbox"/>            |
| 6. Were strategies to deal with confounding factors stated?                 | <input type="checkbox"/>            | <input type="checkbox"/> | <input checked="" type="checkbox"/> | <input type="checkbox"/>            |
| 7. Were the outcomes measured in a valid and reliable way?                  | <input type="checkbox"/>            | <input type="checkbox"/> | <input checked="" type="checkbox"/> | <input type="checkbox"/>            |
| 8. Was appropriate statistical analysis used?                               | <input type="checkbox"/>            | <input type="checkbox"/> | <input type="checkbox"/>            | <input checked="" type="checkbox"/> |

Overall appraisal:    Include ☒    Exclude ☐    Seek further info ☐

Comments (Including reason for exclusion)

---



---



---



## JBI CRITICAL APPRAISAL CHECKLIST FOR ANALYTICAL CROSS SECTIONAL STUDIES

Reviewer \_\_\_\_\_ Date 16.11.20

Author Lindsey et al. Year 2010 Record Number \_\_\_\_\_

|                                                                             | Yes                                 | No                       | Unclear                             | Not applicable           |
|-----------------------------------------------------------------------------|-------------------------------------|--------------------------|-------------------------------------|--------------------------|
| 1. Were the criteria for inclusion in the sample clearly defined?           | <input checked="" type="checkbox"/> | <input type="checkbox"/> | <input type="checkbox"/>            | <input type="checkbox"/> |
| 2. Were the study subjects and the setting described in detail?             | <input type="checkbox"/>            | <input type="checkbox"/> | <input checked="" type="checkbox"/> | <input type="checkbox"/> |
| 3. Was the exposure measured in a valid and reliable way?                   | <input checked="" type="checkbox"/> | <input type="checkbox"/> | <input type="checkbox"/>            | <input type="checkbox"/> |
| 4. Were objective, standard criteria used for measurement of the condition? | <input checked="" type="checkbox"/> | <input type="checkbox"/> | <input type="checkbox"/>            | <input type="checkbox"/> |
| 5. Were confounding factors identified?                                     | <input type="checkbox"/>            | <input type="checkbox"/> | <input checked="" type="checkbox"/> | <input type="checkbox"/> |
| 6. Were strategies to deal with confounding factors stated?                 | <input type="checkbox"/>            | <input type="checkbox"/> | <input checked="" type="checkbox"/> | <input type="checkbox"/> |
| 7. Were the outcomes measured in a valid and reliable way?                  | <input checked="" type="checkbox"/> | <input type="checkbox"/> | <input type="checkbox"/>            | <input type="checkbox"/> |
| 8. Was appropriate statistical analysis used?                               | <input checked="" type="checkbox"/> | <input type="checkbox"/> | <input type="checkbox"/>            | <input type="checkbox"/> |

Overall appraisal: Include ☒ Exclude ☐ Seek further info ☐

Comments (Including reason for exclusion)

---

---

---

# **JBI CRITICAL APPRAISAL CHECKLIST FOR QUASI-EXPERIMENTAL STUDIES**

Reviewer \_\_\_\_\_ Date 17.11.2020

Author Luo et al. Year 2017 Record Number \_\_\_\_\_

|                                                                                                                                             | Yes                                 | No                                  | Unclear                  | Not applicable                      |
|---------------------------------------------------------------------------------------------------------------------------------------------|-------------------------------------|-------------------------------------|--------------------------|-------------------------------------|
| 1. Is it clear in the study what is the 'cause' and what is the 'effect' (i.e. there is no confusion about which variable comes first)?     | <input checked="" type="checkbox"/> | <input type="checkbox"/>            | <input type="checkbox"/> | <input type="checkbox"/>            |
| 2. Were the participants included in any comparisons similar?                                                                               | <input type="checkbox"/>            | <input checked="" type="checkbox"/> | <input type="checkbox"/> | <input type="checkbox"/>            |
| 3. Were the participants included in any comparisons receiving similar treatment/care, other than the exposure or intervention of interest? | <input type="checkbox"/>            | <input checked="" type="checkbox"/> | <input type="checkbox"/> | <input type="checkbox"/>            |
| 4. Was there a control group?                                                                                                               | <input type="checkbox"/>            | <input checked="" type="checkbox"/> | <input type="checkbox"/> | <input type="checkbox"/>            |
| 5. Were there multiple measurements of the outcome both pre and post the intervention/exposure?                                             | <input checked="" type="checkbox"/> | <input type="checkbox"/>            | <input type="checkbox"/> | <input type="checkbox"/>            |
| 6. Was follow up complete and if not, were differences between groups in terms of their follow up adequately described and analyzed?        | <input type="checkbox"/>            | <input type="checkbox"/>            | <input type="checkbox"/> | <input checked="" type="checkbox"/> |
| 7. Were the outcomes of participants included in any comparisons measured in the same way?                                                  | <input checked="" type="checkbox"/> | <input type="checkbox"/>            | <input type="checkbox"/> | <input type="checkbox"/>            |
| 8. Were outcomes measured in a reliable way?                                                                                                | <input checked="" type="checkbox"/> | <input type="checkbox"/>            | <input type="checkbox"/> | <input type="checkbox"/>            |
| 9. Was appropriate statistical analysis used?                                                                                               | <input checked="" type="checkbox"/> | <input type="checkbox"/>            | <input type="checkbox"/> | <input type="checkbox"/>            |

Overall appraisal: Include ☒ Exclude ☐ Seek further info ☐

Comments (Including reason for exclusion)

# **JBI CRITICAL APPRAISAL CHECKLIST FOR ANALYTICAL CROSS SECTIONAL STUDIES**

Reviewer \_\_\_\_\_ Date 17.11.2020

Author Maddula et al. Year 2018 Record Number \_\_\_\_\_

|                                                                             | Yes                                 | No                                  | Unclear                             | Not<br>applicable        |
|-----------------------------------------------------------------------------|-------------------------------------|-------------------------------------|-------------------------------------|--------------------------|
| 1. Were the criteria for inclusion in the sample clearly defined?           | <input type="checkbox"/>            | <input type="checkbox"/>            | <input checked="" type="checkbox"/> | <input type="checkbox"/> |
| 2. Were the study subjects and the setting described in detail?             | <input type="checkbox"/>            | <input checked="" type="checkbox"/> | <input type="checkbox"/>            | <input type="checkbox"/> |
| 3. Was the exposure measured in a valid and reliable way?                   | <input checked="" type="checkbox"/> | <input type="checkbox"/>            | <input type="checkbox"/>            | <input type="checkbox"/> |
| 4. Were objective, standard criteria used for measurement of the condition? | <input type="checkbox"/>            | <input type="checkbox"/>            | <input checked="" type="checkbox"/> | <input type="checkbox"/> |
| 5. Were confounding factors identified?                                     | <input type="checkbox"/>            | <input checked="" type="checkbox"/> | <input type="checkbox"/>            | <input type="checkbox"/> |
| 6. Were strategies to deal with confounding factors stated?                 | <input type="checkbox"/>            | <input checked="" type="checkbox"/> | <input type="checkbox"/>            | <input type="checkbox"/> |
| 7. Were the outcomes measured in a valid and reliable way?                  | <input checked="" type="checkbox"/> | <input type="checkbox"/>            | <input type="checkbox"/>            | <input type="checkbox"/> |
| 8. Was appropriate statistical analysis used?                               | <input type="checkbox"/>            | <input type="checkbox"/>            | <input checked="" type="checkbox"/> | <input type="checkbox"/> |

Overall appraisal:    Include    ☐    Exclude    ☐    Seek further info    ☐

Comments (Including reason for exclusion)

---



---



---

# **JBI CRITICAL APPRAISAL CHECKLIST FOR ANALYTICAL CROSS SECTIONAL STUDIES**

Reviewer \_\_\_\_\_ Date 17.11.2020

Author Mahn et al. Year 2020 Record Number \_\_\_\_\_

|                                                                             | Yes                                 | No                       | Unclear                             | Not<br>applicable        |
|-----------------------------------------------------------------------------|-------------------------------------|--------------------------|-------------------------------------|--------------------------|
| 1. Were the criteria for inclusion in the sample clearly defined?           | <input checked="" type="checkbox"/> | <input type="checkbox"/> | <input type="checkbox"/>            | <input type="checkbox"/> |
| 2. Were the study subjects and the setting described in detail?             | <input checked="" type="checkbox"/> | <input type="checkbox"/> | <input type="checkbox"/>            | <input type="checkbox"/> |
| 3. Was the exposure measured in a valid and reliable way?                   | <input checked="" type="checkbox"/> | <input type="checkbox"/> | <input type="checkbox"/>            | <input type="checkbox"/> |
| 4. Were objective, standard criteria used for measurement of the condition? | <input checked="" type="checkbox"/> | <input type="checkbox"/> | <input type="checkbox"/>            | <input type="checkbox"/> |
| 5. Were confounding factors identified?                                     | <input type="checkbox"/>            | <input type="checkbox"/> | <input checked="" type="checkbox"/> | <input type="checkbox"/> |
| 6. Were strategies to deal with confounding factors stated?                 | <input type="checkbox"/>            | <input type="checkbox"/> | <input checked="" type="checkbox"/> | <input type="checkbox"/> |
| 7. Were the outcomes measured in a valid and reliable way?                  | <input checked="" type="checkbox"/> | <input type="checkbox"/> | <input type="checkbox"/>            | <input type="checkbox"/> |
| 8. Was appropriate statistical analysis used?                               | <input checked="" type="checkbox"/> | <input type="checkbox"/> | <input type="checkbox"/>            | <input type="checkbox"/> |

Overall appraisal:    Include ☒    Exclude ☐    Seek further info ☐

Comments (Including reason for exclusion)

---



---



---

# **JBI CRITICAL APPRAISAL CHECKLIST FOR ANALYTICAL CROSS SECTIONAL STUDIES**

Reviewer \_\_\_\_\_ Date 19.11.2020

Author Montero et al. Year 2014 Record Number \_\_\_\_\_

|                                                                             | Yes                                 | No                                  | Unclear                             | Not<br>applicable        |
|-----------------------------------------------------------------------------|-------------------------------------|-------------------------------------|-------------------------------------|--------------------------|
| 1. Were the criteria for inclusion in the sample clearly defined?           | <input checked="" type="checkbox"/> | <input type="checkbox"/>            | <input type="checkbox"/>            | <input type="checkbox"/> |
| 2. Were the study subjects and the setting described in detail?             | <input type="checkbox"/>            | <input type="checkbox"/>            | <input checked="" type="checkbox"/> | <input type="checkbox"/> |
| 3. Was the exposure measured in a valid and reliable way?                   | <input type="checkbox"/>            | <input type="checkbox"/>            | <input checked="" type="checkbox"/> | <input type="checkbox"/> |
| 4. Were objective, standard criteria used for measurement of the condition? | <input checked="" type="checkbox"/> | <input type="checkbox"/>            | <input type="checkbox"/>            | <input type="checkbox"/> |
| 5. Were confounding factors identified?                                     | <input type="checkbox"/>            | <input type="checkbox"/>            | <input checked="" type="checkbox"/> | <input type="checkbox"/> |
| 6. Were strategies to deal with confounding factors stated?                 | <input type="checkbox"/>            | <input type="checkbox"/>            | <input checked="" type="checkbox"/> | <input type="checkbox"/> |
| 7. Were the outcomes measured in a valid and reliable way?                  | <input type="checkbox"/>            | <input checked="" type="checkbox"/> | <input type="checkbox"/>            | <input type="checkbox"/> |
| 8. Was appropriate statistical analysis used?                               | <input checked="" type="checkbox"/> | <input type="checkbox"/>            | <input type="checkbox"/>            | <input type="checkbox"/> |

Overall appraisal: Include ☒ Exclude ☐ Seek further info ☐

Comments (Including reason for exclusion)

---



---



---

# **JBI CRITICAL APPRAISAL CHECKLIST FOR QUASI-EXPERIMENTAL STUDIES**

Reviewer \_\_\_\_\_ Date 21.11.2020

Author Smith et al Year 2008 Record Number \_\_\_\_\_

|                                                                                                                                             | Yes                                 | No                                  | Unclear                             | Not applicable                      |
|---------------------------------------------------------------------------------------------------------------------------------------------|-------------------------------------|-------------------------------------|-------------------------------------|-------------------------------------|
| 1. Is it clear in the study what is the 'cause' and what is the 'effect' (i.e. there is no confusion about which variable comes first)?     | <input checked="" type="checkbox"/> | <input type="checkbox"/>            | <input type="checkbox"/>            | <input type="checkbox"/>            |
| 2. Were the participants included in any comparisons similar?                                                                               | <input checked="" type="checkbox"/> | <input type="checkbox"/>            | <input type="checkbox"/>            | <input type="checkbox"/>            |
| 3. Were the participants included in any comparisons receiving similar treatment/care, other than the exposure or intervention of interest? | <input type="checkbox"/>            | <input type="checkbox"/>            | <input checked="" type="checkbox"/> | <input type="checkbox"/>            |
| 4. Was there a control group?                                                                                                               | <input type="checkbox"/>            | <input checked="" type="checkbox"/> | <input type="checkbox"/>            | <input type="checkbox"/>            |
| 5. Were there multiple measurements of the outcome both pre and post the intervention/exposure?                                             | <input checked="" type="checkbox"/> | <input type="checkbox"/>            | <input type="checkbox"/>            | <input type="checkbox"/>            |
| 6. Was follow up complete and if not, were differences between groups in terms of their follow up adequately described and analyzed?        | <input type="checkbox"/>            | <input type="checkbox"/>            | <input type="checkbox"/>            | <input checked="" type="checkbox"/> |
| 7. Were the outcomes of participants included in any comparisons measured in the same way?                                                  | <input checked="" type="checkbox"/> | <input type="checkbox"/>            | <input type="checkbox"/>            | <input type="checkbox"/>            |
| 8. Were outcomes measured in a reliable way?                                                                                                | <input checked="" type="checkbox"/> | <input type="checkbox"/>            | <input type="checkbox"/>            | <input type="checkbox"/>            |
| 9. Was appropriate statistical analysis used?                                                                                               | <input checked="" type="checkbox"/> | <input type="checkbox"/>            | <input type="checkbox"/>            | <input type="checkbox"/>            |

Overall appraisal: Include ☒ Exclude ☐ Seek further info ☐

Comments (Including reason for exclusion)

# **JBI CRITICAL APPRAISAL CHECKLIST FOR QUASI-EXPERIMENTAL STUDIES**

Reviewer \_\_\_\_\_ Date 22.11.2020

Author Tam et al Year 2016 Record Number \_\_\_\_\_

|                                                                                                                                             | Yes                                 | No                                  | Unclear                  | Not applicable                      |
|---------------------------------------------------------------------------------------------------------------------------------------------|-------------------------------------|-------------------------------------|--------------------------|-------------------------------------|
| 1. Is it clear in the study what is the 'cause' and what is the 'effect' (i.e. there is no confusion about which variable comes first)?     | <input checked="" type="checkbox"/> | <input type="checkbox"/>            | <input type="checkbox"/> | <input type="checkbox"/>            |
| 2. Were the participants included in any comparisons similar?                                                                               | <input checked="" type="checkbox"/> | <input type="checkbox"/>            | <input type="checkbox"/> | <input type="checkbox"/>            |
| 3. Were the participants included in any comparisons receiving similar treatment/care, other than the exposure or intervention of interest? | <input type="checkbox"/>            | <input type="checkbox"/>            | <input type="checkbox"/> | <input checked="" type="checkbox"/> |
| 4. Was there a control group?                                                                                                               | <input type="checkbox"/>            | <input checked="" type="checkbox"/> | <input type="checkbox"/> | <input type="checkbox"/>            |
| 5. Were there multiple measurements of the outcome both pre and post the intervention/exposure?                                             | <input type="checkbox"/>            | <input checked="" type="checkbox"/> | <input type="checkbox"/> | <input type="checkbox"/>            |
| 6. Was follow up complete and if not, were differences between groups in terms of their follow up adequately described and analyzed?        | <input type="checkbox"/>            | <input type="checkbox"/>            | <input type="checkbox"/> | <input checked="" type="checkbox"/> |
| 7. Were the outcomes of participants included in any comparisons measured in the same way?                                                  | <input checked="" type="checkbox"/> | <input type="checkbox"/>            | <input type="checkbox"/> | <input type="checkbox"/>            |
| 8. Were outcomes measured in a reliable way?                                                                                                | <input checked="" type="checkbox"/> | <input type="checkbox"/>            | <input type="checkbox"/> | <input type="checkbox"/>            |
| 9. Was appropriate statistical analysis used?                                                                                               | <input checked="" type="checkbox"/> | <input type="checkbox"/>            | <input type="checkbox"/> | <input type="checkbox"/>            |

Overall appraisal: Include ☒ Exclude ☐ Seek further info ☐

Comments (Including reason for exclusion)

---



---



---

# **JBI CRITICAL APPRAISAL CHECKLIST FOR QUASI-EXPERIMENTAL STUDIES**

Reviewer \_\_\_\_\_ Date 23.11.2020

Author Tung et al. Year 2010 Record Number \_\_\_\_\_

|                                                                                                                                             | Yes                                 | No                       | Unclear                             | Not applicable                      |
|---------------------------------------------------------------------------------------------------------------------------------------------|-------------------------------------|--------------------------|-------------------------------------|-------------------------------------|
| 1. Is it clear in the study what is the 'cause' and what is the 'effect' (i.e. there is no confusion about which variable comes first)?     | <input checked="" type="checkbox"/> | <input type="checkbox"/> | <input type="checkbox"/>            | <input type="checkbox"/>            |
| 2. Were the participants included in any comparisons similar?                                                                               | <input checked="" type="checkbox"/> | <input type="checkbox"/> | <input type="checkbox"/>            | <input type="checkbox"/>            |
| 3. Were the participants included in any comparisons receiving similar treatment/care, other than the exposure or intervention of interest? | <input checked="" type="checkbox"/> | <input type="checkbox"/> | <input type="checkbox"/>            | <input type="checkbox"/>            |
| 4. Was there a control group?                                                                                                               | <input type="checkbox"/>            | <input type="checkbox"/> | <input checked="" type="checkbox"/> | <input type="checkbox"/>            |
| 5. Were there multiple measurements of the outcome both pre and post the intervention/exposure?                                             | <input type="checkbox"/>            | <input type="checkbox"/> | <input type="checkbox"/>            | <input checked="" type="checkbox"/> |
| 6. Was follow up complete and if not, were differences between groups in terms of their follow up adequately described and analyzed?        | <input type="checkbox"/>            | <input type="checkbox"/> | <input type="checkbox"/>            | <input checked="" type="checkbox"/> |
| 7. Were the outcomes of participants included in any comparisons measured in the same way?                                                  | <input checked="" type="checkbox"/> | <input type="checkbox"/> | <input type="checkbox"/>            | <input type="checkbox"/>            |
| 8. Were outcomes measured in a reliable way?                                                                                                | <input checked="" type="checkbox"/> | <input type="checkbox"/> | <input type="checkbox"/>            | <input type="checkbox"/>            |
| 9. Was appropriate statistical analysis used?                                                                                               | <input checked="" type="checkbox"/> | <input type="checkbox"/> | <input type="checkbox"/>            | <input type="checkbox"/>            |

Overall appraisal:    Include    ☐    Exclude    ☐    Seek further info    ☐

Comments (Including reason for exclusion)

---



---



---



# **JBI CRITICAL APPRAISAL CHECKLIST FOR QUASI-EXPERIMENTAL STUDIES**

Reviewer \_\_\_\_\_ Date 24.11.2020

Author Liu et al Year 2019 Record Number \_\_\_\_\_

|                                                                                                                                             | Yes                                 | No                       | Unclear                             | Not applicable                      |
|---------------------------------------------------------------------------------------------------------------------------------------------|-------------------------------------|--------------------------|-------------------------------------|-------------------------------------|
| 1. Is it clear in the study what is the 'cause' and what is the 'effect' (i.e. there is no confusion about which variable comes first)?     | <input checked="" type="checkbox"/> | <input type="checkbox"/> | <input type="checkbox"/>            | <input type="checkbox"/>            |
| 2. Were the participants included in any comparisons similar?                                                                               | <input checked="" type="checkbox"/> | <input type="checkbox"/> | <input type="checkbox"/>            | <input type="checkbox"/>            |
| 3. Were the participants included in any comparisons receiving similar treatment/care, other than the exposure or intervention of interest? | <input checked="" type="checkbox"/> | <input type="checkbox"/> | <input type="checkbox"/>            | <input type="checkbox"/>            |
| 4. Was there a control group?                                                                                                               | <input type="checkbox"/>            | <input type="checkbox"/> | <input checked="" type="checkbox"/> | <input type="checkbox"/>            |
| 5. Were there multiple measurements of the outcome both pre and post the intervention/exposure?                                             | <input type="checkbox"/>            | <input type="checkbox"/> | <input type="checkbox"/>            | <input checked="" type="checkbox"/> |
| 6. Was follow up complete and if not, were differences between groups in terms of their follow up adequately described and analyzed?        | <input type="checkbox"/>            | <input type="checkbox"/> | <input type="checkbox"/>            | <input checked="" type="checkbox"/> |
| 7. Were the outcomes of participants included in any comparisons measured in the same way?                                                  | <input checked="" type="checkbox"/> | <input type="checkbox"/> | <input type="checkbox"/>            | <input type="checkbox"/>            |
| 8. Were outcomes measured in a reliable way?                                                                                                | <input checked="" type="checkbox"/> | <input type="checkbox"/> | <input type="checkbox"/>            | <input type="checkbox"/>            |
| 9. Was appropriate statistical analysis used?                                                                                               | <input checked="" type="checkbox"/> | <input type="checkbox"/> | <input type="checkbox"/>            | <input type="checkbox"/>            |

Overall appraisal: Include ☒ Exclude ☐ Seek further info ☐

Comments (Including reason for exclusion)

# **JBI CRITICAL APPRAISAL CHECKLIST FOR QUASI-EXPERIMENTAL STUDIES**

Reviewer \_\_\_\_\_ Date 24.11.20

Author Justiawan et al. Year 2019 Record Number \_\_\_\_\_

|                                                                                                                                             | Yes                                 | No                                  | Unclear                             | Not applicable                      |
|---------------------------------------------------------------------------------------------------------------------------------------------|-------------------------------------|-------------------------------------|-------------------------------------|-------------------------------------|
| 1. Is it clear in the study what is the 'cause' and what is the 'effect' (i.e. there is no confusion about which variable comes first)?     | <input checked="" type="checkbox"/> | <input type="checkbox"/>            | <input type="checkbox"/>            | <input type="checkbox"/>            |
| 2. Were the participants included in any comparisons similar?                                                                               | <input checked="" type="checkbox"/> | <input type="checkbox"/>            | <input type="checkbox"/>            | <input type="checkbox"/>            |
| 3. Were the participants included in any comparisons receiving similar treatment/care, other than the exposure or intervention of interest? | <input type="checkbox"/>            | <input type="checkbox"/>            | <input checked="" type="checkbox"/> | <input type="checkbox"/>            |
| 4. Was there a control group?                                                                                                               | <input type="checkbox"/>            | <input checked="" type="checkbox"/> | <input type="checkbox"/>            | <input type="checkbox"/>            |
| 5. Were there multiple measurements of the outcome both pre and post the intervention/exposure?                                             | <input type="checkbox"/>            | <input checked="" type="checkbox"/> | <input type="checkbox"/>            | <input type="checkbox"/>            |
| 6. Was follow up complete and if not, were differences between groups in terms of their follow up adequately described and analyzed?        | <input type="checkbox"/>            | <input type="checkbox"/>            | <input type="checkbox"/>            | <input checked="" type="checkbox"/> |
| 7. Were the outcomes of participants included in any comparisons measured in the same way?                                                  | <input checked="" type="checkbox"/> | <input type="checkbox"/>            | <input type="checkbox"/>            | <input type="checkbox"/>            |
| 8. Were outcomes measured in a reliable way?                                                                                                | <input checked="" type="checkbox"/> | <input type="checkbox"/>            | <input type="checkbox"/>            | <input type="checkbox"/>            |
| 9. Was appropriate statistical analysis used?                                                                                               | <input checked="" type="checkbox"/> | <input type="checkbox"/>            | <input type="checkbox"/>            | <input type="checkbox"/>            |

Overall appraisal: Include ☒ Exclude ☐ Seek further info ☐

Comments (Including reason for exclusion)

---



---



---

# **JBI CRITICAL APPRAISAL CHECKLIST FOR QUASI-EXPERIMENTAL STUDIES**

Reviewer \_\_\_\_\_ Date 26.11.2020

Author Lin et al. Year 2019 Record Number \_\_\_\_\_

|                                                                                                                                             | Yes                                 | No                                  | Unclear                             | Not applicable                      |
|---------------------------------------------------------------------------------------------------------------------------------------------|-------------------------------------|-------------------------------------|-------------------------------------|-------------------------------------|
| 1. Is it clear in the study what is the 'cause' and what is the 'effect' (i.e. there is no confusion about which variable comes first)?     | <input checked="" type="checkbox"/> | <input type="checkbox"/>            | <input type="checkbox"/>            | <input type="checkbox"/>            |
| 2. Were the participants included in any comparisons similar?                                                                               | <input checked="" type="checkbox"/> | <input type="checkbox"/>            | <input type="checkbox"/>            | <input type="checkbox"/>            |
| 3. Were the participants included in any comparisons receiving similar treatment/care, other than the exposure or intervention of interest? | <input type="checkbox"/>            | <input type="checkbox"/>            | <input type="checkbox"/>            | <input checked="" type="checkbox"/> |
| 4. Was there a control group?                                                                                                               | <input type="checkbox"/>            | <input checked="" type="checkbox"/> | <input type="checkbox"/>            | <input type="checkbox"/>            |
| 5. Were there multiple measurements of the outcome both pre and post the intervention/exposure?                                             | <input checked="" type="checkbox"/> | <input type="checkbox"/>            | <input type="checkbox"/>            | <input type="checkbox"/>            |
| 6. Was follow up complete and if not, were differences between groups in terms of their follow up adequately described and analyzed?        | <input type="checkbox"/>            | <input type="checkbox"/>            | <input type="checkbox"/>            | <input checked="" type="checkbox"/> |
| 7. Were the outcomes of participants included in any comparisons measured in the same way?                                                  | <input checked="" type="checkbox"/> | <input type="checkbox"/>            | <input type="checkbox"/>            | <input type="checkbox"/>            |
| 8. Were outcomes measured in a reliable way?                                                                                                | <input checked="" type="checkbox"/> | <input type="checkbox"/>            | <input type="checkbox"/>            | <input type="checkbox"/>            |
| 9. Was appropriate statistical analysis used?                                                                                               | <input type="checkbox"/>            | <input type="checkbox"/>            | <input checked="" type="checkbox"/> | <input type="checkbox"/>            |

Overall appraisal: Include ☒ Exclude ☐ Seek further info ☐

Comments (Including reason for exclusion)

# **JBI CRITICAL APPRAISAL CHECKLIST FOR QUASI-EXPERIMENTAL STUDIES**

Reviewer \_\_\_\_\_ Date 25.11.2020

Author Kim et al. Year 2018 Record Number \_\_\_\_\_

|                                                                                                                                             | Yes                                 | No                                  | Unclear                             | Not applicable                      |
|---------------------------------------------------------------------------------------------------------------------------------------------|-------------------------------------|-------------------------------------|-------------------------------------|-------------------------------------|
| 1. Is it clear in the study what is the 'cause' and what is the 'effect' (i.e. there is no confusion about which variable comes first)?     | <input type="checkbox"/>            | <input type="checkbox"/>            | <input checked="" type="checkbox"/> | <input type="checkbox"/>            |
| 2. Were the participants included in any comparisons similar?                                                                               | <input checked="" type="checkbox"/> | <input type="checkbox"/>            | <input type="checkbox"/>            | <input type="checkbox"/>            |
| 3. Were the participants included in any comparisons receiving similar treatment/care, other than the exposure or intervention of interest? | <input type="checkbox"/>            | <input type="checkbox"/>            | <input checked="" type="checkbox"/> | <input type="checkbox"/>            |
| 4. Was there a control group?                                                                                                               | <input type="checkbox"/>            | <input checked="" type="checkbox"/> | <input type="checkbox"/>            | <input type="checkbox"/>            |
| 5. Were there multiple measurements of the outcome both pre and post the intervention/exposure?                                             | <input type="checkbox"/>            | <input checked="" type="checkbox"/> | <input type="checkbox"/>            | <input type="checkbox"/>            |
| 6. Was follow up complete and if not, were differences between groups in terms of their follow up adequately described and analyzed?        | <input type="checkbox"/>            | <input type="checkbox"/>            | <input type="checkbox"/>            | <input checked="" type="checkbox"/> |
| 7. Were the outcomes of participants included in any comparisons measured in the same way?                                                  | <input checked="" type="checkbox"/> | <input type="checkbox"/>            | <input type="checkbox"/>            | <input type="checkbox"/>            |
| 8. Were outcomes measured in a reliable way?                                                                                                | <input checked="" type="checkbox"/> | <input type="checkbox"/>            | <input type="checkbox"/>            | <input type="checkbox"/>            |
| 9. Was appropriate statistical analysis used?                                                                                               | <input checked="" type="checkbox"/> | <input type="checkbox"/>            | <input type="checkbox"/>            | <input type="checkbox"/>            |

Overall appraisal: Include ☒ Exclude ☐ Seek further info ☐

Comments (Including reason for exclusion)

---



---



---

# **Endodontics and Dental esthetics**

# **JBI CRITICAL APPRAISAL CHECKLIST FOR ANALYTICAL CROSS SECTIONAL STUDIES**

Reviewer \_\_\_\_\_ Date 2.12.20

Author Bentley et al. Year 1999 Record Number \_\_\_\_\_

|                                                                             | Yes                                 | No                       | Unclear                             | Not<br>applicable        |
|-----------------------------------------------------------------------------|-------------------------------------|--------------------------|-------------------------------------|--------------------------|
| 1. Were the criteria for inclusion in the sample clearly defined?           | <input checked="" type="checkbox"/> | <input type="checkbox"/> | <input type="checkbox"/>            | <input type="checkbox"/> |
| 2. Were the study subjects and the setting described in detail?             | <input checked="" type="checkbox"/> | <input type="checkbox"/> | <input type="checkbox"/>            | <input type="checkbox"/> |
| 3. Was the exposure measured in a valid and reliable way?                   | <input checked="" type="checkbox"/> | <input type="checkbox"/> | <input type="checkbox"/>            | <input type="checkbox"/> |
| 4. Were objective, standard criteria used for measurement of the condition? | <input checked="" type="checkbox"/> | <input type="checkbox"/> | <input type="checkbox"/>            | <input type="checkbox"/> |
| 5. Were confounding factors identified?                                     | <input type="checkbox"/>            | <input type="checkbox"/> | <input checked="" type="checkbox"/> | <input type="checkbox"/> |
| 6. Were strategies to deal with confounding factors stated?                 | <input type="checkbox"/>            | <input type="checkbox"/> | <input checked="" type="checkbox"/> | <input type="checkbox"/> |
| 7. Were the outcomes measured in a valid and reliable way?                  | <input checked="" type="checkbox"/> | <input type="checkbox"/> | <input type="checkbox"/>            | <input type="checkbox"/> |
| 8. Was appropriate statistical analysis used?                               | <input checked="" type="checkbox"/> | <input type="checkbox"/> | <input type="checkbox"/>            | <input type="checkbox"/> |

Overall appraisal:    Include    ☒    Exclude    ☐    Seek further info    ☐

Comments (Including reason for exclusion)

---



---



---

# **JBI CRITICAL APPRAISAL CHECKLIST FOR QUASI-EXPERIMENTAL STUDIES**

Reviewer \_\_\_\_\_ Date 2.12.2020

Author Gadhia et al. Year 2006 Record Number \_\_\_\_\_

|                                                                                                                                             | Yes                                 | No                                  | Unclear                             | Not applicable           |
|---------------------------------------------------------------------------------------------------------------------------------------------|-------------------------------------|-------------------------------------|-------------------------------------|--------------------------|
| 1. Is it clear in the study what is the 'cause' and what is the 'effect' (i.e. there is no confusion about which variable comes first)?     | <input checked="" type="checkbox"/> | <input type="checkbox"/>            | <input type="checkbox"/>            | <input type="checkbox"/> |
| 2. Were the participants included in any comparisons similar?                                                                               | <input checked="" type="checkbox"/> | <input type="checkbox"/>            | <input type="checkbox"/>            | <input type="checkbox"/> |
| 3. Were the participants included in any comparisons receiving similar treatment/care, other than the exposure or intervention of interest? | <input checked="" type="checkbox"/> | <input type="checkbox"/>            | <input type="checkbox"/>            | <input type="checkbox"/> |
| 4. Was there a control group?                                                                                                               | <input type="checkbox"/>            | <input type="checkbox"/>            | <input checked="" type="checkbox"/> | <input type="checkbox"/> |
| 5. Were there multiple measurements of the outcome both pre and post the intervention/exposure?                                             | <input checked="" type="checkbox"/> | <input type="checkbox"/>            | <input type="checkbox"/>            | <input type="checkbox"/> |
| 6. Was follow up complete and if not, were differences between groups in terms of their follow up adequately described and analyzed?        | <input type="checkbox"/>            | <input type="checkbox"/>            | <input checked="" type="checkbox"/> | <input type="checkbox"/> |
| 7. Were the outcomes of participants included in any comparisons measured in the same way?                                                  | <input type="checkbox"/>            | <input checked="" type="checkbox"/> | <input type="checkbox"/>            | <input type="checkbox"/> |
| 8. Were outcomes measured in a reliable way?                                                                                                | <input checked="" type="checkbox"/> | <input type="checkbox"/>            | <input type="checkbox"/>            | <input type="checkbox"/> |
| 9. Was appropriate statistical analysis used?                                                                                               | <input checked="" type="checkbox"/> | <input type="checkbox"/>            | <input type="checkbox"/>            | <input type="checkbox"/> |

Overall appraisal: Include ☒ Exclude ☐ Seek further info ☐

Comments (Including reason for exclusion)

# **JBI CRITICAL APPRAISAL CHECKLIST FOR QUASI-EXPERIMENTAL STUDIES**

Reviewer \_\_\_\_\_ Date 3.12.2020

Author Garg et al. Year 2020 Record Number \_\_\_\_\_

|                                                                                                                                             | Yes                                 | No                                  | Unclear                  | Not applicable           |
|---------------------------------------------------------------------------------------------------------------------------------------------|-------------------------------------|-------------------------------------|--------------------------|--------------------------|
| 1. Is it clear in the study what is the 'cause' and what is the 'effect' (i.e. there is no confusion about which variable comes first)?     | <input checked="" type="checkbox"/> | <input type="checkbox"/>            | <input type="checkbox"/> | <input type="checkbox"/> |
| 2. Were the participants included in any comparisons similar?                                                                               | <input checked="" type="checkbox"/> | <input type="checkbox"/>            | <input type="checkbox"/> | <input type="checkbox"/> |
| 3. Were the participants included in any comparisons receiving similar treatment/care, other than the exposure or intervention of interest? | <input checked="" type="checkbox"/> | <input type="checkbox"/>            | <input type="checkbox"/> | <input type="checkbox"/> |
| 4. Was there a control group?                                                                                                               | <input type="checkbox"/>            | <input checked="" type="checkbox"/> | <input type="checkbox"/> | <input type="checkbox"/> |
| 5. Were there multiple measurements of the outcome both pre and post the intervention/exposure?                                             | <input checked="" type="checkbox"/> | <input type="checkbox"/>            | <input type="checkbox"/> | <input type="checkbox"/> |
| 6. Was follow up complete and if not, were differences between groups in terms of their follow up adequately described and analyzed?        | <input checked="" type="checkbox"/> | <input type="checkbox"/>            | <input type="checkbox"/> | <input type="checkbox"/> |
| 7. Were the outcomes of participants included in any comparisons measured in the same way?                                                  | <input checked="" type="checkbox"/> | <input type="checkbox"/>            | <input type="checkbox"/> | <input type="checkbox"/> |
| 8. Were outcomes measured in a reliable way?                                                                                                | <input checked="" type="checkbox"/> | <input type="checkbox"/>            | <input type="checkbox"/> | <input type="checkbox"/> |
| 9. Was appropriate statistical analysis used?                                                                                               | <input checked="" type="checkbox"/> | <input type="checkbox"/>            | <input type="checkbox"/> | <input type="checkbox"/> |

Overall appraisal: Include ☒ Exclude ☐ Seek further info ☐

Comments (Including reason for exclusion)



## JBI CRITICAL APPRAISAL CHECKLIST FOR QUASI-EXPERIMENTAL STUDIES

Reviewer \_\_\_\_\_ Date 10.12.2020

Author Guan et al. Year 2003 Record Number \_\_\_\_\_

|                                                                                                                                             | Yes                                 | No                       | Unclear                             | Not applicable                      |
|---------------------------------------------------------------------------------------------------------------------------------------------|-------------------------------------|--------------------------|-------------------------------------|-------------------------------------|
| 1. Is it clear in the study what is the 'cause' and what is the 'effect' (i.e. there is no confusion about which variable comes first)?     | <input type="checkbox"/>            | <input type="checkbox"/> | <input checked="" type="checkbox"/> | <input type="checkbox"/>            |
| 2. Were the participants included in any comparisons similar?                                                                               | <input checked="" type="checkbox"/> | <input type="checkbox"/> | <input type="checkbox"/>            | <input type="checkbox"/>            |
| 3. Were the participants included in any comparisons receiving similar treatment/care, other than the exposure or intervention of interest? | <input checked="" type="checkbox"/> | <input type="checkbox"/> | <input type="checkbox"/>            | <input type="checkbox"/>            |
| 4. Was there a control group?                                                                                                               | <input type="checkbox"/>            | <input type="checkbox"/> | <input checked="" type="checkbox"/> | <input type="checkbox"/>            |
| 5. Were there multiple measurements of the outcome both pre and post the intervention/exposure?                                             | <input checked="" type="checkbox"/> | <input type="checkbox"/> | <input type="checkbox"/>            | <input type="checkbox"/>            |
| 6. Was follow up complete and if not, were differences between groups in terms of their follow up adequately described and analyzed?        | <input type="checkbox"/>            | <input type="checkbox"/> | <input type="checkbox"/>            | <input checked="" type="checkbox"/> |
| 7. Were the outcomes of participants included in any comparisons measured in the same way?                                                  | <input checked="" type="checkbox"/> | <input type="checkbox"/> | <input type="checkbox"/>            | <input type="checkbox"/>            |
| 8. Were outcomes measured in a reliable way?                                                                                                | <input checked="" type="checkbox"/> | <input type="checkbox"/> | <input type="checkbox"/>            | <input type="checkbox"/>            |
| 9. Was appropriate statistical analysis used?                                                                                               | <input checked="" type="checkbox"/> | <input type="checkbox"/> | <input type="checkbox"/>            | <input type="checkbox"/>            |

Overall appraisal: Include ☒ Exclude ☐ Seek further info ☐

Comments (Including reason for exclusion)

---

---

---

# **JBI CRITICAL APPRAISAL CHECKLIST FOR QUASI-EXPERIMENTAL STUDIES**

Reviewer \_\_\_\_\_ Date 4.5.20

Author Jarad et al. Year 2008 Record Number \_\_\_\_\_

|                                                                                                                                             | Yes                                 | No                                  | Unclear                             | Not applicable                      |
|---------------------------------------------------------------------------------------------------------------------------------------------|-------------------------------------|-------------------------------------|-------------------------------------|-------------------------------------|
| 1. Is it clear in the study what is the 'cause' and what is the 'effect' (i.e. there is no confusion about which variable comes first)?     | <input type="checkbox"/>            | <input type="checkbox"/>            | <input checked="" type="checkbox"/> | <input type="checkbox"/>            |
| 2. Were the participants included in any comparisons similar?                                                                               | <input checked="" type="checkbox"/> | <input type="checkbox"/>            | <input type="checkbox"/>            | <input type="checkbox"/>            |
| 3. Were the participants included in any comparisons receiving similar treatment/care, other than the exposure or intervention of interest? | <input type="checkbox"/>            | <input type="checkbox"/>            | <input checked="" type="checkbox"/> | <input type="checkbox"/>            |
| 4. Was there a control group?                                                                                                               | <input type="checkbox"/>            | <input checked="" type="checkbox"/> | <input type="checkbox"/>            | <input type="checkbox"/>            |
| 5. Were there multiple measurements of the outcome both pre and post the intervention/exposure?                                             | <input type="checkbox"/>            | <input type="checkbox"/>            | <input checked="" type="checkbox"/> | <input type="checkbox"/>            |
| 6. Was follow up complete and if not, were differences between groups in terms of their follow up adequately described and analyzed?        | <input type="checkbox"/>            | <input type="checkbox"/>            | <input type="checkbox"/>            | <input checked="" type="checkbox"/> |
| 7. Were the outcomes of participants included in any comparisons measured in the same way?                                                  | <input checked="" type="checkbox"/> | <input type="checkbox"/>            | <input type="checkbox"/>            | <input type="checkbox"/>            |
| 8. Were outcomes measured in a reliable way?                                                                                                | <input checked="" type="checkbox"/> | <input type="checkbox"/>            | <input type="checkbox"/>            | <input type="checkbox"/>            |
| 9. Was appropriate statistical analysis used?                                                                                               | <input checked="" type="checkbox"/> | <input type="checkbox"/>            | <input type="checkbox"/>            | <input type="checkbox"/>            |

Overall appraisal: Include ☒ Exclude ☐ Seek further info ☐

Comments (Including reason for exclusion)

---



---



---

# **JBI CRITICAL APPRAISAL CHECKLIST FOR ANALYTICAL CROSS SECTIONAL STUDIES**

Reviewer \_\_\_\_\_ Date 5.12.2020

Author Kim et al. Year 2017 Record Number \_\_\_\_\_

|                                                                             | Yes                                 | No                       | Unclear                             | Not<br>applicable        |
|-----------------------------------------------------------------------------|-------------------------------------|--------------------------|-------------------------------------|--------------------------|
| 1. Were the criteria for inclusion in the sample clearly defined?           | <input checked="" type="checkbox"/> | <input type="checkbox"/> | <input type="checkbox"/>            | <input type="checkbox"/> |
| 2. Were the study subjects and the setting described in detail?             | <input checked="" type="checkbox"/> | <input type="checkbox"/> | <input type="checkbox"/>            | <input type="checkbox"/> |
| 3. Was the exposure measured in a valid and reliable way?                   | <input checked="" type="checkbox"/> | <input type="checkbox"/> | <input type="checkbox"/>            | <input type="checkbox"/> |
| 4. Were objective, standard criteria used for measurement of the condition? | <input checked="" type="checkbox"/> | <input type="checkbox"/> | <input type="checkbox"/>            | <input type="checkbox"/> |
| 5. Were confounding factors identified?                                     | <input type="checkbox"/>            | <input type="checkbox"/> | <input checked="" type="checkbox"/> | <input type="checkbox"/> |
| 6. Were strategies to deal with confounding factors stated?                 | <input type="checkbox"/>            | <input type="checkbox"/> | <input checked="" type="checkbox"/> | <input type="checkbox"/> |
| 7. Were the outcomes measured in a valid and reliable way?                  | <input checked="" type="checkbox"/> | <input type="checkbox"/> | <input type="checkbox"/>            | <input type="checkbox"/> |
| 8. Was appropriate statistical analysis used?                               | <input checked="" type="checkbox"/> | <input type="checkbox"/> | <input type="checkbox"/>            | <input type="checkbox"/> |

Overall appraisal: Include ☒ Exclude ☐ Seek further info ☐

Comments (Including reason for exclusion)

---



---



---

# **JBI CRITICAL APPRAISAL CHECKLIST FOR QUASI-EXPERIMENTAL STUDIES**

Reviewer \_\_\_\_\_ Date 05.12.2020

Author Kuzekanani et al. Year 2009 Record Number \_\_\_\_\_

|                                                                                                                                             | Yes                                 | No                                  | Unclear                             | Not applicable           |
|---------------------------------------------------------------------------------------------------------------------------------------------|-------------------------------------|-------------------------------------|-------------------------------------|--------------------------|
| 1. Is it clear in the study what is the 'cause' and what is the 'effect' (i.e. there is no confusion about which variable comes first)?     | <input checked="" type="checkbox"/> | <input type="checkbox"/>            | <input type="checkbox"/>            | <input type="checkbox"/> |
| 2. Were the participants included in any comparisons similar?                                                                               | <input checked="" type="checkbox"/> | <input type="checkbox"/>            | <input type="checkbox"/>            | <input type="checkbox"/> |
| 3. Were the participants included in any comparisons receiving similar treatment/care, other than the exposure or intervention of interest? | <input checked="" type="checkbox"/> | <input type="checkbox"/>            | <input type="checkbox"/>            | <input type="checkbox"/> |
| 4. Was there a control group?                                                                                                               | <input type="checkbox"/>            | <input checked="" type="checkbox"/> | <input type="checkbox"/>            | <input type="checkbox"/> |
| 5. Were there multiple measurements of the outcome both pre and post the intervention/exposure?                                             | <input checked="" type="checkbox"/> | <input type="checkbox"/>            | <input type="checkbox"/>            | <input type="checkbox"/> |
| 6. Was follow up complete and if not, were differences between groups in terms of their follow up adequately described and analyzed?        | <input type="checkbox"/>            | <input type="checkbox"/>            | <input checked="" type="checkbox"/> | <input type="checkbox"/> |
| 7. Were the outcomes of participants included in any comparisons measured in the same way?                                                  | <input checked="" type="checkbox"/> | <input type="checkbox"/>            | <input type="checkbox"/>            | <input type="checkbox"/> |
| 8. Were outcomes measured in a reliable way?                                                                                                | <input checked="" type="checkbox"/> | <input type="checkbox"/>            | <input type="checkbox"/>            | <input type="checkbox"/> |
| 9. Was appropriate statistical analysis used?                                                                                               | <input type="checkbox"/>            | <input type="checkbox"/>            | <input type="checkbox"/>            | <input type="checkbox"/> |

Overall appraisal:    Include    ☒ Exclude    ☐ Seek further info    ☐

Comments (Including reason for exclusion)

---



---



---

# JBI CRITICAL APPRAISAL CHECKLIST FOR QUASI-EXPERIMENTAL STUDIES

Reviewer \_\_\_\_\_ Date 06.12.2020

Author Lee et al. Year 2007 Record Number \_\_\_\_\_

|                                                                                                                                             | Yes                                 | No                                  | Unclear                  | Not applicable                      |
|---------------------------------------------------------------------------------------------------------------------------------------------|-------------------------------------|-------------------------------------|--------------------------|-------------------------------------|
| 1. Is it clear in the study what is the 'cause' and what is the 'effect' (i.e. there is no confusion about which variable comes first)?     | <input checked="" type="checkbox"/> | <input type="checkbox"/>            | <input type="checkbox"/> | <input type="checkbox"/>            |
| 2. Were the participants included in any comparisons similar?                                                                               | <input checked="" type="checkbox"/> | <input type="checkbox"/>            | <input type="checkbox"/> | <input type="checkbox"/>            |
| 3. Were the participants included in any comparisons receiving similar treatment/care, other than the exposure or intervention of interest? | <input checked="" type="checkbox"/> | <input type="checkbox"/>            | <input type="checkbox"/> | <input type="checkbox"/>            |
| 4. Was there a control group?                                                                                                               | <input type="checkbox"/>            | <input checked="" type="checkbox"/> | <input type="checkbox"/> | <input type="checkbox"/>            |
| 5. Were there multiple measurements of the outcome both pre and post the intervention/exposure?                                             | <input checked="" type="checkbox"/> | <input type="checkbox"/>            | <input type="checkbox"/> | <input type="checkbox"/>            |
| 6. Was follow up complete and if not, were differences between groups in terms of their follow up adequately described and analyzed?        | <input type="checkbox"/>            | <input type="checkbox"/>            | <input type="checkbox"/> | <input checked="" type="checkbox"/> |
| 7. Were the outcomes of participants included in any comparisons measured in the same way?                                                  | <input checked="" type="checkbox"/> | <input type="checkbox"/>            | <input type="checkbox"/> | <input type="checkbox"/>            |
| 8. Were outcomes measured in a reliable way?                                                                                                | <input checked="" type="checkbox"/> | <input type="checkbox"/>            | <input type="checkbox"/> | <input type="checkbox"/>            |
| 9. Was appropriate statistical analysis used?                                                                                               | <input checked="" type="checkbox"/> | <input type="checkbox"/>            | <input type="checkbox"/> | <input type="checkbox"/>            |

Overall appraisal: Include ☒ Exclude ☐ Seek further info ☐

Comments (Including reason for exclusion)

# **Prosthodontics**

# JBI CRITICAL APPRAISAL CHECKLIST FOR COHORT STUDIES

Reviewer \_\_\_\_\_ Date 31.10.2020  
 Author Yousof et al. Year 2019 Record Number 1

|                                                                                                               | Yes                                 | No                                  | Unclear                             | Not applicable                      |
|---------------------------------------------------------------------------------------------------------------|-------------------------------------|-------------------------------------|-------------------------------------|-------------------------------------|
| 1. Were the two groups similar and recruited from the same population?                                        | <input type="checkbox"/>            | <input checked="" type="checkbox"/> | <input type="checkbox"/>            | <input type="checkbox"/>            |
| 2. Were the exposures measured similarly to assign people                                                     | <input type="checkbox"/>            | <input checked="" type="checkbox"/> | <input type="checkbox"/>            | <input type="checkbox"/>            |
| 3. to both exposed and unexposed groups?                                                                      |                                     |                                     |                                     |                                     |
| 4. Was the exposure measured in a valid and reliable way?                                                     | <input type="checkbox"/>            | <input type="checkbox"/>            | <input checked="" type="checkbox"/> | <input type="checkbox"/>            |
| 5. Were confounding factors identified?                                                                       | <input type="checkbox"/>            | <input type="checkbox"/>            | <input checked="" type="checkbox"/> | <input type="checkbox"/>            |
| 6. Were strategies to deal with confounding factors stated?                                                   | <input type="checkbox"/>            | <input type="checkbox"/>            | <input checked="" type="checkbox"/> | <input type="checkbox"/>            |
| 7. Were the groups/participants free of the outcome at the start of the study (or at the moment of exposure)? | <input type="checkbox"/>            | <input type="checkbox"/>            | <input type="checkbox"/>            | <input checked="" type="checkbox"/> |
| 8. Were the outcomes measured in a valid and reliable way?                                                    | <input checked="" type="checkbox"/> | <input type="checkbox"/>            | <input type="checkbox"/>            | <input type="checkbox"/>            |
| 9. Was the follow up time reported and sufficient to be long enough for outcomes to occur?                    | <input type="checkbox"/>            | <input type="checkbox"/>            | <input type="checkbox"/>            | <input checked="" type="checkbox"/> |
| 10. Was follow up complete, and if not, were the reasons to loss to follow up described and explored?         | <input type="checkbox"/>            | <input type="checkbox"/>            | <input type="checkbox"/>            | <input checked="" type="checkbox"/> |
| 11. Were strategies to address incomplete follow up utilized?                                                 | <input type="checkbox"/>            | <input type="checkbox"/>            | <input type="checkbox"/>            | <input checked="" type="checkbox"/> |
| 12. Was appropriate statistical analysis used?                                                                | <input checked="" type="checkbox"/> | <input type="checkbox"/>            | <input type="checkbox"/>            | <input type="checkbox"/>            |

Overall appraisal: Include ☒ Exclude ☐ Seek further info ☐

Comments (Including reason for exclusion)

# JBI CRITICAL APPRAISAL CHECKLIST FOR COHORT STUDIES

Reviewer \_\_\_\_\_ Date 14.10.2020

Author BILT\* et al Year 2012 Record Number 2

Yes No Unclear Not applicable

1. Were the two groups similar and recruited from the same population? ☒ Yes ☐ No ☐ Unclear ☐ Not applicable
2. Were the exposures measured similarly to assign people ☒ Yes ☐ No ☐ Unclear ☐ Not applicable
3. to both exposed and unexposed groups? ☒ Yes ☐ No ☐ Unclear ☐ Not applicable
4. Was the exposure measured in a valid and reliable way? ☒ Yes ☐ No ☐ Unclear ☐ Not applicable
5. Were confounding factors identified? ☐ Yes ☐ No ☒ Unclear ☐ Not applicable
6. Were strategies to deal with confounding factors stated? ☐ Yes ☐ No ☒ Unclear ☐ Not applicable
7. Were the groups/participants free of the outcome at the start of the study (or at the moment of exposure)? ☐ Yes ☐ No ☐ Unclear ☒ Not applicable
8. Were the outcomes measured in a valid and reliable way? ☒ Yes ☐ No ☐ Unclear ☐ Not applicable
9. Was the follow up time reported and sufficient to be long enough for outcomes to occur? ☐ Yes ☐ No ☐ Unclear ☒ Not applicable
10. Was follow up complete, and if not, were the reasons to loss to follow up described and explored? ☐ Yes ☐ No ☐ Unclear ☒ Not applicable
11. Were strategies to address incomplete follow up utilized? ☐ Yes ☐ No ☐ Unclear ☒ Not applicable
12. Was appropriate statistical analysis used? ☒ Yes ☐ No ☐ Unclear ☐ Not applicable

Overall appraisal: Include ☒ Exclude ☐ Seek further info ☐

Comments (Including reason for exclusion)



## JBI Critical Appraisal Checklist for Case Series

Reviewer \_\_\_\_\_ Date 14.10.2020

Author Maccarty et al. Year 1976 Record Number \_\_\_\_\_

|                                                                                                                 | Yes                                 | No                                  | Unclear                             | Not applicable           |
|-----------------------------------------------------------------------------------------------------------------|-------------------------------------|-------------------------------------|-------------------------------------|--------------------------|
| • Were there clear criteria for inclusion in the case series?                                                   | <input checked="" type="checkbox"/> | <input type="checkbox"/>            | <input type="checkbox"/>            | <input type="checkbox"/> |
| • Was the condition measured in a standard, reliable way for all participants included in the case series?      | <input type="checkbox"/>            | <input type="checkbox"/>            | <input checked="" type="checkbox"/> | <input type="checkbox"/> |
| • Were valid methods used for identification of the condition for all participants included in the case series? | <input type="checkbox"/>            | <input type="checkbox"/>            | <input checked="" type="checkbox"/> | <input type="checkbox"/> |
| • Did the case series have consecutive inclusion of participants?                                               | <input type="checkbox"/>            | <input checked="" type="checkbox"/> | <input type="checkbox"/>            | <input type="checkbox"/> |
| • Did the case series have complete inclusion of participants?                                                  | <input type="checkbox"/>            | <input type="checkbox"/>            | <input checked="" type="checkbox"/> | <input type="checkbox"/> |
| • Was there clear reporting of the demographics of the participants in the study?                               | <input checked="" type="checkbox"/> | <input type="checkbox"/>            | <input type="checkbox"/>            | <input type="checkbox"/> |
| • Was there clear reporting of clinical information of the participants?                                        | <input checked="" type="checkbox"/> | <input type="checkbox"/>            | <input type="checkbox"/>            | <input type="checkbox"/> |
| • Were the outcomes or follow up results of cases clearly reported?                                             | <input checked="" type="checkbox"/> | <input type="checkbox"/>            | <input type="checkbox"/>            | <input type="checkbox"/> |
| • Was there clear reporting of the presenting site(s)/clinic(s) demographic information?                        | <input type="checkbox"/>            | <input checked="" type="checkbox"/> | <input type="checkbox"/>            | <input type="checkbox"/> |
| • Was statistical analysis appropriate?                                                                         | <input type="checkbox"/>            | <input type="checkbox"/>            | <input checked="" type="checkbox"/> | <input type="checkbox"/> |

Overall appraisal: Include ☒ Exclude ☐ Seek further info ☐

Comments (Including reason for exclusion)

---



---

# **Maxillofacial Prostheses**

## JBICRITICAL APPRAISAL CHECKLIST FORANALYTICAL CROSS SECTIONAL STUDIES

Reviewer \_\_\_\_\_ Date 16.09.2020

Author Lagouvardos et al Year 2018 Record Number 1

|                                                                             | Yes                                 | No                                  | Unclear                             | Not applicable           |
|-----------------------------------------------------------------------------|-------------------------------------|-------------------------------------|-------------------------------------|--------------------------|
| 1. Were the criteria for inclusion in the sample clearly defined?           | <input checked="" type="checkbox"/> | <input type="checkbox"/>            | <input type="checkbox"/>            | <input type="checkbox"/> |
| 2. Were the study subjects and the setting described in detail?             | <input checked="" type="checkbox"/> | <input type="checkbox"/>            | <input type="checkbox"/>            | <input type="checkbox"/> |
| 3. Was the exposure measured in a valid and reliable way?                   | <input checked="" type="checkbox"/> | <input type="checkbox"/>            | <input type="checkbox"/>            | <input type="checkbox"/> |
| 4. Were objective, standard criteria used for measurement of the condition? | <input checked="" type="checkbox"/> | <input type="checkbox"/>            | <input type="checkbox"/>            | <input type="checkbox"/> |
| 5. Were confounding factors identified?                                     | <input checked="" type="checkbox"/> | <input type="checkbox"/>            | <input type="checkbox"/>            | <input type="checkbox"/> |
| 6. Were strategies to deal with confounding factors stated?                 | <input type="checkbox"/>            | <input type="checkbox"/>            | <input checked="" type="checkbox"/> | <input type="checkbox"/> |
| 7. Were the outcomes measured in a valid and reliable way?                  | <input type="checkbox"/>            | <input checked="" type="checkbox"/> | <input type="checkbox"/>            | <input type="checkbox"/> |
| 8. Was appropriate statistical analysis used?                               | <input checked="" type="checkbox"/> | <input type="checkbox"/>            | <input type="checkbox"/>            | <input type="checkbox"/> |

Overall appraisal: Include ☒ Exclude ☐ Seek further info ☐

Comments (Including reason for exclusion)

---

---

---

## JBI CRITICAL APPRAISAL CHECKLIST FOR COHORT STUDIES

Reviewer \_\_\_\_\_ Date 16.092020

Author Mulcare et al Year 2018 Record Number 2

|                                                                                                               | Yes                                 | No                       | Unclear                             | Not applicable                      |
|---------------------------------------------------------------------------------------------------------------|-------------------------------------|--------------------------|-------------------------------------|-------------------------------------|
| 1. Were the two groups similar and recruited from the same population?                                        | <input checked="" type="checkbox"/> | <input type="checkbox"/> | <input type="checkbox"/>            | <input type="checkbox"/>            |
| 2. Were the exposures measured similarly to assign people                                                     | <input checked="" type="checkbox"/> | <input type="checkbox"/> | <input type="checkbox"/>            | <input type="checkbox"/>            |
| 3. to both exposed and unexposed groups?                                                                      |                                     |                          |                                     |                                     |
| 4. Was the exposure measured in a valid and reliable way?                                                     | <input checked="" type="checkbox"/> | <input type="checkbox"/> | <input type="checkbox"/>            | <input type="checkbox"/>            |
| 5. Were confounding factors identified?                                                                       | <input checked="" type="checkbox"/> | <input type="checkbox"/> | <input type="checkbox"/>            | <input type="checkbox"/>            |
| 6. Were strategies to deal with confounding factors stated?                                                   | <input checked="" type="checkbox"/> | <input type="checkbox"/> | <input type="checkbox"/>            | <input type="checkbox"/>            |
| 7. Were the groups/participants free of the outcome at the start of the study (or at the moment of exposure)? | <input type="checkbox"/>            | <input type="checkbox"/> | <input checked="" type="checkbox"/> | <input type="checkbox"/>            |
| 8. Were the outcomes measured in a valid and reliable way?                                                    | <input type="checkbox"/>            | <input type="checkbox"/> | <input checked="" type="checkbox"/> | <input type="checkbox"/>            |
| 9. Was the follow up time reported and sufficient to be long enough for outcomes to occur?                    | <input type="checkbox"/>            | <input type="checkbox"/> | <input type="checkbox"/>            | <input checked="" type="checkbox"/> |
| 10. Was follow up complete, and if not, were the reasons to loss to follow up described and explored?         | <input type="checkbox"/>            | <input type="checkbox"/> | <input type="checkbox"/>            | <input checked="" type="checkbox"/> |
| 11. Were strategies to address incomplete follow up utilized?                                                 | <input type="checkbox"/>            | <input type="checkbox"/> | <input type="checkbox"/>            | <input checked="" type="checkbox"/> |
| 12. Was appropriate statistical analysis used?                                                                | <input checked="" type="checkbox"/> | <input type="checkbox"/> | <input type="checkbox"/>            | <input type="checkbox"/>            |

Overall appraisal: Include ☒ Exclude ☐ Seek further info ☐

Comments (Including reason for exclusion)

# **JBI CRITICAL APPRAISAL CHECKLIST FOR QUASI-EXPERIMENTAL STUDIES**

Reviewer \_\_\_\_\_ Date 17.09.2020

Author Sohaib et al Year 2018 Record Number 3

|                                                                                                                                             | Yes                                 | No                       | Unclear                             | Not applicable                      |
|---------------------------------------------------------------------------------------------------------------------------------------------|-------------------------------------|--------------------------|-------------------------------------|-------------------------------------|
| 1. Is it clear in the study what is the 'cause' and what is the 'effect' (i.e. there is no confusion about which variable comes first)?     | <input checked="" type="checkbox"/> | <input type="checkbox"/> | <input type="checkbox"/>            | <input type="checkbox"/>            |
| 2. Were the participants included in any comparisons similar?                                                                               | <input checked="" type="checkbox"/> | <input type="checkbox"/> | <input type="checkbox"/>            | <input type="checkbox"/>            |
| 3. Were the participants included in any comparisons receiving similar treatment/care, other than the exposure or intervention of interest? | <input checked="" type="checkbox"/> | <input type="checkbox"/> | <input type="checkbox"/>            | <input type="checkbox"/>            |
| 4. Was there a control group?                                                                                                               | <input type="checkbox"/>            | <input type="checkbox"/> | <input checked="" type="checkbox"/> | <input type="checkbox"/>            |
| 5. Were there multiple measurements of the outcome both pre and post the intervention/exposure?                                             | <input checked="" type="checkbox"/> | <input type="checkbox"/> | <input type="checkbox"/>            | <input type="checkbox"/>            |
| 6. Was follow up complete and if not, were differences between groups in terms of their follow up adequately described and analyzed?        | <input type="checkbox"/>            | <input type="checkbox"/> | <input type="checkbox"/>            | <input checked="" type="checkbox"/> |
| 7. Were the outcomes of participants included in any comparisons measured in the same way?                                                  | <input checked="" type="checkbox"/> | <input type="checkbox"/> | <input type="checkbox"/>            | <input type="checkbox"/>            |
| 8. Were outcomes measured in a reliable way?                                                                                                | <input checked="" type="checkbox"/> | <input type="checkbox"/> | <input type="checkbox"/>            | <input type="checkbox"/>            |
| 9. Was appropriate statistical analysis used?                                                                                               | <input type="checkbox"/>            | <input type="checkbox"/> | <input checked="" type="checkbox"/> | <input type="checkbox"/>            |

Overall appraisal: Include ☒ Exclude ☐ Seek further info ☐

Comments (Including reason for exclusion)

---



---



---

# JBI CRITICAL APPRAISAL CHECKLIST FOR CASE REPORTS

Reviewer \_\_\_\_\_ Date 17.09.2020

Author PRICOP et al Year 2016 Record Number 4

|                                                                                         | Yes                                 | No                                  | Unclear                             | Not applicable           |
|-----------------------------------------------------------------------------------------|-------------------------------------|-------------------------------------|-------------------------------------|--------------------------|
| 1. Were patient's demographic characteristics clearly described?                        | <input type="checkbox"/>            | <input type="checkbox"/>            | <input checked="" type="checkbox"/> | <input type="checkbox"/> |
| 2. Was the patient's history clearly described and presented as a timeline?             | <input type="checkbox"/>            | <input checked="" type="checkbox"/> | <input type="checkbox"/>            | <input type="checkbox"/> |
| 3. Was the current clinical condition of the patient on presentation clearly described? | <input type="checkbox"/>            | <input type="checkbox"/>            | <input checked="" type="checkbox"/> | <input type="checkbox"/> |
| 4. Were diagnostic tests or assessment methods and the results clearly described?       | <input type="checkbox"/>            | <input type="checkbox"/>            | <input checked="" type="checkbox"/> | <input type="checkbox"/> |
| 5. Was the intervention(s) or treatment procedure(s) clearly described?                 | <input checked="" type="checkbox"/> | <input type="checkbox"/>            | <input type="checkbox"/>            | <input type="checkbox"/> |
| 6. Was the post-intervention clinical condition clearly described?                      | <input type="checkbox"/>            | <input type="checkbox"/>            | <input checked="" type="checkbox"/> | <input type="checkbox"/> |
| 7. Were adverse events (harms) or unanticipated events identified and described?        | <input type="checkbox"/>            | <input checked="" type="checkbox"/> | <input type="checkbox"/>            | <input type="checkbox"/> |
| 8. Does the case report provide takeaway lessons?                                       | <input checked="" type="checkbox"/> | <input type="checkbox"/>            | <input type="checkbox"/>            | <input type="checkbox"/> |

Overall appraisal: Include ☒ Exclude ☐ Seek further info ☐

Comments (Including reason for exclusion)

---



---



---

# JBI CRITICAL APPRAISAL CHECKLIST FOR CASE REPORTS

Reviewer \_\_\_\_\_ Date 21.09.2020

Author Grant et al Year 2015 Record Number 5

|                                                                                         | Yes                                 | No                       | Unclear                             | Not applicable           |
|-----------------------------------------------------------------------------------------|-------------------------------------|--------------------------|-------------------------------------|--------------------------|
| 1. Were patient's demographic characteristics clearly described?                        | <input checked="" type="checkbox"/> | <input type="checkbox"/> | <input type="checkbox"/>            | <input type="checkbox"/> |
| 2. Was the patient's history clearly described and presented as a timeline?             | <input checked="" type="checkbox"/> | <input type="checkbox"/> | <input type="checkbox"/>            | <input type="checkbox"/> |
| 3. Was the current clinical condition of the patient on presentation clearly described? | <input checked="" type="checkbox"/> | <input type="checkbox"/> | <input type="checkbox"/>            | <input type="checkbox"/> |
| 4. Were diagnostic tests or assessment methods and the results clearly described?       | <input type="checkbox"/>            | <input type="checkbox"/> | <input checked="" type="checkbox"/> | <input type="checkbox"/> |
| 5. Was the intervention(s) or treatment procedure(s) clearly described?                 | <input checked="" type="checkbox"/> | <input type="checkbox"/> | <input type="checkbox"/>            | <input type="checkbox"/> |
| 6. Was the post-intervention clinical condition clearly described?                      | <input checked="" type="checkbox"/> | <input type="checkbox"/> | <input type="checkbox"/>            | <input type="checkbox"/> |
| 7. Were adverse events (harms) or unanticipated events identified and described?        | <input type="checkbox"/>            | <input type="checkbox"/> | <input checked="" type="checkbox"/> | <input type="checkbox"/> |
| 8. Does the case report provide takeaway lessons?                                       | <input checked="" type="checkbox"/> | <input type="checkbox"/> | <input type="checkbox"/>            | <input type="checkbox"/> |

Overall appraisal: Include ☒ Exclude ☐ Seek further info ☐

Comments (Including reason for exclusion)

---



---



---

# **JBI CRITICAL APPRAISAL CHECKLIST FOR QUASI-EXPERIMENTAL STUDIES**

Reviewer \_\_\_\_\_ Date 18.09.2020

Author Xiao et al Year 2014 Record Number 6

|                                                                                                                                             | Yes                                 | No                       | Unclear                             | Not applicable                      |
|---------------------------------------------------------------------------------------------------------------------------------------------|-------------------------------------|--------------------------|-------------------------------------|-------------------------------------|
| 1. Is it clear in the study what is the 'cause' and what is the 'effect' (i.e. there is no confusion about which variable comes first)?     | <input type="checkbox"/>            | <input type="checkbox"/> | <input checked="" type="checkbox"/> | <input type="checkbox"/>            |
| 2. Were the participants included in any comparisons similar?                                                                               | <input checked="" type="checkbox"/> | <input type="checkbox"/> | <input type="checkbox"/>            | <input type="checkbox"/>            |
| 3. Were the participants included in any comparisons receiving similar treatment/care, other than the exposure or intervention of interest? | <input checked="" type="checkbox"/> | <input type="checkbox"/> | <input type="checkbox"/>            | <input type="checkbox"/>            |
| 4. Was there a control group?                                                                                                               | <input type="checkbox"/>            | <input type="checkbox"/> | <input checked="" type="checkbox"/> | <input type="checkbox"/>            |
| 5. Were there multiple measurements of the outcome both pre and post the intervention/exposure?                                             | <input checked="" type="checkbox"/> | <input type="checkbox"/> | <input type="checkbox"/>            | <input type="checkbox"/>            |
| 6. Was follow up complete and if not, were differences between groups in terms of their follow up adequately described and analyzed?        | <input type="checkbox"/>            | <input type="checkbox"/> | <input type="checkbox"/>            | <input checked="" type="checkbox"/> |
| 7. Were the outcomes of participants included in any comparisons measured in the same way?                                                  | <input checked="" type="checkbox"/> | <input type="checkbox"/> | <input type="checkbox"/>            | <input type="checkbox"/>            |
| 8. Were outcomes measured in a reliable way?                                                                                                | <input checked="" type="checkbox"/> | <input type="checkbox"/> | <input type="checkbox"/>            | <input type="checkbox"/>            |
| 9. Was appropriate statistical analysis used?                                                                                               | <input type="checkbox"/>            | <input type="checkbox"/> | <input type="checkbox"/>            | <input checked="" type="checkbox"/> |

Overall appraisal:    Include ☒    Exclude ☐    Seek further info ☐

Comments (Including reason for exclusion)

---



---



---



# JBI CRITICAL APPRAISAL CHECKLIST FOR CASE REPORTS

Reviewer \_\_\_\_\_ Date 21.09.2020

Author Buzayan et al Year 2014 Record Number 7

|                                                                                         | Yes                                 | No                       | Unclear                             | Not applicable           |
|-----------------------------------------------------------------------------------------|-------------------------------------|--------------------------|-------------------------------------|--------------------------|
| 1. Were patient's demographic characteristics clearly described?                        | <input type="checkbox"/>            | <input type="checkbox"/> | <input checked="" type="checkbox"/> | <input type="checkbox"/> |
| 2. Was the patient's history clearly described and presented as a timeline?             | <input type="checkbox"/>            | <input type="checkbox"/> | <input checked="" type="checkbox"/> | <input type="checkbox"/> |
| 3. Was the current clinical condition of the patient on presentation clearly described? | <input type="checkbox"/>            | <input type="checkbox"/> | <input checked="" type="checkbox"/> | <input type="checkbox"/> |
| 4. Were diagnostic tests or assessment methods and the results clearly described?       | <input checked="" type="checkbox"/> | <input type="checkbox"/> | <input type="checkbox"/>            | <input type="checkbox"/> |
| 5. Was the intervention(s) or treatment procedure(s) clearly described?                 | <input checked="" type="checkbox"/> | <input type="checkbox"/> | <input type="checkbox"/>            | <input type="checkbox"/> |
| 6. Was the post-intervention clinical condition clearly described?                      | <input checked="" type="checkbox"/> | <input type="checkbox"/> | <input type="checkbox"/>            | <input type="checkbox"/> |
| 7. Were adverse events (harms) or unanticipated events identified and described?        | <input type="checkbox"/>            | <input type="checkbox"/> | <input checked="" type="checkbox"/> | <input type="checkbox"/> |
| 8. Does the case report provide takeaway lessons?                                       | <input checked="" type="checkbox"/> | <input type="checkbox"/> | <input type="checkbox"/>            | <input type="checkbox"/> |

Overall appraisal: Include ☒ Exclude ☐ Seek further info ☐

Comments (Including reason for exclusion)

---

---

---

# **JBI CRITICAL APPRAISAL CHECKLIST FOR CASE CONTROL STUDIES**

Reviewer \_\_\_\_\_ Date 18.09.2020

Author Tan et al Year 2013 Record Number 8

|                                                                                                                  | Yes                                 | No                       | Unclear                             | Not applicable                      |
|------------------------------------------------------------------------------------------------------------------|-------------------------------------|--------------------------|-------------------------------------|-------------------------------------|
| 1. Were the groups comparable other than the presence of disease in cases or the absence of disease in controls? | <input type="checkbox"/>            | <input type="checkbox"/> | <input type="checkbox"/>            | <input checked="" type="checkbox"/> |
| 2. Were cases and controls matched appropriately?                                                                | <input checked="" type="checkbox"/> | <input type="checkbox"/> | <input type="checkbox"/>            | <input type="checkbox"/>            |
| 3. Were the same criteria used for identification of cases and controls?                                         | <input checked="" type="checkbox"/> | <input type="checkbox"/> | <input type="checkbox"/>            | <input type="checkbox"/>            |
| 4. Was exposure measured in a standard, valid and reliable way?                                                  | <input checked="" type="checkbox"/> | <input type="checkbox"/> | <input type="checkbox"/>            | <input type="checkbox"/>            |
| 5. Was exposure measured in the same way for cases and controls?                                                 | <input checked="" type="checkbox"/> | <input type="checkbox"/> | <input type="checkbox"/>            | <input type="checkbox"/>            |
| 6. Were confounding factors identified?                                                                          | <input checked="" type="checkbox"/> | <input type="checkbox"/> | <input type="checkbox"/>            | <input type="checkbox"/>            |
| 7. Were strategies to deal with confounding factors stated?                                                      | <input type="checkbox"/>            | <input type="checkbox"/> | <input checked="" type="checkbox"/> | <input type="checkbox"/>            |
| 8. Were outcomes assessed in a standard, valid and reliable way for cases and controls?                          | <input checked="" type="checkbox"/> | <input type="checkbox"/> | <input type="checkbox"/>            | <input type="checkbox"/>            |
| 9. Was the exposure period of interest long enough to be meaningful?                                             | <input checked="" type="checkbox"/> | <input type="checkbox"/> | <input type="checkbox"/>            | <input type="checkbox"/>            |
| 10. Was appropriate statistical analysis used?                                                                   | <input checked="" type="checkbox"/> | <input type="checkbox"/> | <input type="checkbox"/>            | <input type="checkbox"/>            |

Overall appraisal:    Include ☒    Exclude ☐    Seek further info ☐

Comments (Including reason for exclusion)

---



---



---

# **JBI CRITICAL APPRAISAL CHECKLIST FOR QUASI-EXPERIMENTAL STUDIES**

Reviewer \_\_\_\_\_ Date 19.09.2020

Author Xiao et al Year 2013 Record Number 9

|                                                                                                                                             | Yes                                 | No                       | Unclear                             | Not applicable                      |
|---------------------------------------------------------------------------------------------------------------------------------------------|-------------------------------------|--------------------------|-------------------------------------|-------------------------------------|
| 1. Is it clear in the study what is the 'cause' and what is the 'effect' (i.e. there is no confusion about which variable comes first)?     | <input type="checkbox"/>            | <input type="checkbox"/> | <input checked="" type="checkbox"/> | <input type="checkbox"/>            |
| 2. Were the participants included in any comparisons similar?                                                                               | <input checked="" type="checkbox"/> | <input type="checkbox"/> | <input type="checkbox"/>            | <input type="checkbox"/>            |
| 3. Were the participants included in any comparisons receiving similar treatment/care, other than the exposure or intervention of interest? | <input checked="" type="checkbox"/> | <input type="checkbox"/> | <input type="checkbox"/>            | <input type="checkbox"/>            |
| 4. Was there a control group?                                                                                                               | <input type="checkbox"/>            | <input type="checkbox"/> | <input checked="" type="checkbox"/> | <input type="checkbox"/>            |
| 5. Were there multiple measurements of the outcome both pre and post the intervention/exposure?                                             | <input checked="" type="checkbox"/> | <input type="checkbox"/> | <input type="checkbox"/>            | <input type="checkbox"/>            |
| 6. Was follow up complete and if not, were differences between groups in terms of their follow up adequately described and analyzed?        | <input type="checkbox"/>            | <input type="checkbox"/> | <input type="checkbox"/>            | <input checked="" type="checkbox"/> |
| 7. Were the outcomes of participants included in any comparisons measured in the same way?                                                  | <input checked="" type="checkbox"/> | <input type="checkbox"/> | <input type="checkbox"/>            | <input type="checkbox"/>            |
| 8. Were outcomes measured in a reliable way?                                                                                                | <input checked="" type="checkbox"/> | <input type="checkbox"/> | <input type="checkbox"/>            | <input type="checkbox"/>            |
| 9. Was appropriate statistical analysis used?                                                                                               | <input checked="" type="checkbox"/> | <input type="checkbox"/> | <input type="checkbox"/>            | <input type="checkbox"/>            |

Overall appraisal: Include ☒ Exclude ☐ Seek further info ☐

Comments (Including reason for exclusion)

---



---



---

# JBI CRITICAL APPRAISAL CHECKLIST FOR COHORT STUDIES

Reviewer \_\_\_\_\_ Date 17.09.2020

Author Seo et al Year 2011 Record Number 10

|                                                                                                               | Yes                                 | No                       | Unclear                             | Not applicable                      |
|---------------------------------------------------------------------------------------------------------------|-------------------------------------|--------------------------|-------------------------------------|-------------------------------------|
| 1. Were the two groups similar and recruited from the same population?                                        | <input checked="" type="checkbox"/> | <input type="checkbox"/> | <input type="checkbox"/>            | <input type="checkbox"/>            |
| 2. Were the exposures measured similarly to assign people                                                     | <input checked="" type="checkbox"/> | <input type="checkbox"/> | <input type="checkbox"/>            | <input type="checkbox"/>            |
| 3. to both exposed and unexposed groups?                                                                      |                                     |                          |                                     |                                     |
| 4. Was the exposure measured in a valid and reliable way?                                                     | <input checked="" type="checkbox"/> | <input type="checkbox"/> | <input type="checkbox"/>            | <input type="checkbox"/>            |
| 5. Were confounding factors identified?                                                                       | <input checked="" type="checkbox"/> | <input type="checkbox"/> | <input type="checkbox"/>            | <input type="checkbox"/>            |
| 6. Were strategies to deal with confounding factors stated?                                                   | <input checked="" type="checkbox"/> | <input type="checkbox"/> | <input type="checkbox"/>            | <input type="checkbox"/>            |
| 7. Were the groups/participants free of the outcome at the start of the study (or at the moment of exposure)? | <input type="checkbox"/>            | <input type="checkbox"/> | <input checked="" type="checkbox"/> | <input type="checkbox"/>            |
| 8. Were the outcomes measured in a valid and reliable way?                                                    | <input checked="" type="checkbox"/> | <input type="checkbox"/> | <input type="checkbox"/>            | <input type="checkbox"/>            |
| 9. Was the follow up time reported and sufficient to be long enough for outcomes to occur?                    | <input type="checkbox"/>            | <input type="checkbox"/> | <input type="checkbox"/>            | <input checked="" type="checkbox"/> |
| 10. Was follow up complete, and if not, were the reasons to loss to follow up described and explored?         | <input type="checkbox"/>            | <input type="checkbox"/> | <input type="checkbox"/>            | <input checked="" type="checkbox"/> |
| 11. Were strategies to address incomplete follow up utilized?                                                 | <input type="checkbox"/>            | <input type="checkbox"/> | <input type="checkbox"/>            | <input checked="" type="checkbox"/> |
| 12. Was appropriate statistical analysis used?                                                                | <input checked="" type="checkbox"/> | <input type="checkbox"/> | <input type="checkbox"/>            | <input type="checkbox"/>            |

Overall appraisal: Include ☒ Exclude ☐ Seek further info ☐

Comments (Including reason for exclusion)

# **JBI CRITICAL APPRAISAL CHECKLIST FOR QUASI-EXPERIMENTAL STUDIES**

Reviewer \_\_\_\_\_ Date 19.09.2020

Author Delalleau et al Year 2011 Record Number 11

|                                                                                                                                             | Yes                                 | No                       | Unclear                             | Not applicable                      |
|---------------------------------------------------------------------------------------------------------------------------------------------|-------------------------------------|--------------------------|-------------------------------------|-------------------------------------|
| 1. Is it clear in the study what is the 'cause' and what is the 'effect' (i.e. there is no confusion about which variable comes first)?     | <input checked="" type="checkbox"/> | <input type="checkbox"/> | <input type="checkbox"/>            | <input type="checkbox"/>            |
| 2. Were the participants included in any comparisons similar?                                                                               | <input checked="" type="checkbox"/> | <input type="checkbox"/> | <input type="checkbox"/>            | <input type="checkbox"/>            |
| 3. Were the participants included in any comparisons receiving similar treatment/care, other than the exposure or intervention of interest? | <input checked="" type="checkbox"/> | <input type="checkbox"/> | <input type="checkbox"/>            | <input type="checkbox"/>            |
| 4. Was there a control group?                                                                                                               | <input type="checkbox"/>            | <input type="checkbox"/> | <input checked="" type="checkbox"/> | <input type="checkbox"/>            |
| 5. Were there multiple measurements of the outcome both pre and post the intervention/exposure?                                             | <input checked="" type="checkbox"/> | <input type="checkbox"/> | <input type="checkbox"/>            | <input type="checkbox"/>            |
| 6. Was follow up complete and if not, were differences between groups in terms of their follow up adequately described and analyzed?        | <input type="checkbox"/>            | <input type="checkbox"/> | <input checked="" type="checkbox"/> | <input type="checkbox"/>            |
| 7. Were the outcomes of participants included in any comparisons measured in the same way?                                                  | <input checked="" type="checkbox"/> | <input type="checkbox"/> | <input type="checkbox"/>            | <input type="checkbox"/>            |
| 8. Were outcomes measured in a reliable way?                                                                                                | <input checked="" type="checkbox"/> | <input type="checkbox"/> | <input type="checkbox"/>            | <input type="checkbox"/>            |
| 9. Was appropriate statistical analysis used?                                                                                               | <input type="checkbox"/>            | <input type="checkbox"/> | <input type="checkbox"/>            | <input checked="" type="checkbox"/> |

Overall appraisal:    Include ☒    Exclude ☐    Seek further info ☐

Comments (Including reason for exclusion)

---



---



---

# JBI CRITICAL APPRAISAL CHECKLIST FOR CASE REPORTS

Reviewer \_\_\_\_\_ Date 21.09.2020

Author Jain et al Year 2010 Record Number 12

|                                                                                         | Yes                                 | No                       | Unclear                             | Not applicable           |
|-----------------------------------------------------------------------------------------|-------------------------------------|--------------------------|-------------------------------------|--------------------------|
| 1. Were patient's demographic characteristics clearly described?                        | <input checked="" type="checkbox"/> | <input type="checkbox"/> | <input type="checkbox"/>            | <input type="checkbox"/> |
| 2. Was the patient's history clearly described and presented as a timeline?             | <input checked="" type="checkbox"/> | <input type="checkbox"/> | <input type="checkbox"/>            | <input type="checkbox"/> |
| 3. Was the current clinical condition of the patient on presentation clearly described? | <input checked="" type="checkbox"/> | <input type="checkbox"/> | <input type="checkbox"/>            | <input type="checkbox"/> |
| 4. Were diagnostic tests or assessment methods and the results clearly described?       | <input checked="" type="checkbox"/> | <input type="checkbox"/> | <input type="checkbox"/>            | <input type="checkbox"/> |
| 5. Was the intervention(s) or treatment procedure(s) clearly described?                 | <input checked="" type="checkbox"/> | <input type="checkbox"/> | <input type="checkbox"/>            | <input type="checkbox"/> |
| 6. Was the post-intervention clinical condition clearly described?                      | <input checked="" type="checkbox"/> | <input type="checkbox"/> | <input type="checkbox"/>            | <input type="checkbox"/> |
| 7. Were adverse events (harms) or unanticipated events identified and described?        | <input type="checkbox"/>            | <input type="checkbox"/> | <input checked="" type="checkbox"/> | <input type="checkbox"/> |
| 8. Does the case report provide takeaway lessons?                                       | <input checked="" type="checkbox"/> | <input type="checkbox"/> | <input type="checkbox"/>            | <input type="checkbox"/> |

Overall appraisal: Include ☒ Exclude ☐ Seek further info ☐

Comments (Including reason for exclusion)

---



---



---

# **JBI CRITICAL APPRAISAL CHECKLIST FOR QUASI-EXPERIMENTAL STUDIES**

Reviewer \_\_\_\_\_ Date 20.09.2020

Author Pladellorens et al Year 2008 Record Number 13

|                                                                                                                                             | Yes                                 | No                       | Unclear                             | Not applicable                      |
|---------------------------------------------------------------------------------------------------------------------------------------------|-------------------------------------|--------------------------|-------------------------------------|-------------------------------------|
| 1. Is it clear in the study what is the 'cause' and what is the 'effect' (i.e. there is no confusion about which variable comes first)?     | <input type="checkbox"/>            | <input type="checkbox"/> | <input checked="" type="checkbox"/> | <input type="checkbox"/>            |
| 2. Were the participants included in any comparisons similar?                                                                               | <input checked="" type="checkbox"/> | <input type="checkbox"/> | <input type="checkbox"/>            | <input type="checkbox"/>            |
| 3. Were the participants included in any comparisons receiving similar treatment/care, other than the exposure or intervention of interest? | <input type="checkbox"/>            | <input type="checkbox"/> | <input checked="" type="checkbox"/> | <input type="checkbox"/>            |
| 4. Was there a control group?                                                                                                               | <input type="checkbox"/>            | <input type="checkbox"/> | <input checked="" type="checkbox"/> | <input type="checkbox"/>            |
| 5. Were there multiple measurements of the outcome both pre and post the intervention/exposure?                                             | <input type="checkbox"/>            | <input type="checkbox"/> | <input checked="" type="checkbox"/> | <input type="checkbox"/>            |
| 6. Was follow up complete and if not, were differences between groups in terms of their follow up adequately described and analyzed?        | <input type="checkbox"/>            | <input type="checkbox"/> | <input checked="" type="checkbox"/> | <input type="checkbox"/>            |
| 7. Were the outcomes of participants included in any comparisons measured in the same way?                                                  | <input checked="" type="checkbox"/> | <input type="checkbox"/> | <input type="checkbox"/>            | <input type="checkbox"/>            |
| 8. Were outcomes measured in a reliable way?                                                                                                | <input checked="" type="checkbox"/> | <input type="checkbox"/> | <input type="checkbox"/>            | <input type="checkbox"/>            |
| 9. Was appropriate statistical analysis used?                                                                                               | <input type="checkbox"/>            | <input type="checkbox"/> | <input type="checkbox"/>            | <input checked="" type="checkbox"/> |

Overall appraisal:    Include ☒    Exclude ☐    Seek further info ☐

Comments (Including reason for exclusion)

---



---



---

# JBI CRITICAL APPRAISAL CHECKLIST FOR QUASI-EXPERIMENTAL STUDIES

Reviewer \_\_\_\_\_ Date 18.09.2020

Author Tao et al Year 2003 Record Number 14

|                                                                                                                                             | Yes                                 | No                                  | Unclear                             | Not applicable                      |
|---------------------------------------------------------------------------------------------------------------------------------------------|-------------------------------------|-------------------------------------|-------------------------------------|-------------------------------------|
| 1. Is it clear in the study what is the 'cause' and what is the 'effect' (i.e. there is no confusion about which variable comes first)?     | <input type="checkbox"/>            | <input type="checkbox"/>            | <input checked="" type="checkbox"/> | <input type="checkbox"/>            |
| 2. Were the participants included in any comparisons similar?                                                                               | <input checked="" type="checkbox"/> | <input type="checkbox"/>            | <input type="checkbox"/>            | <input type="checkbox"/>            |
| 3. Were the participants included in any comparisons receiving similar treatment/care, other than the exposure or intervention of interest? | <input type="checkbox"/>            | <input type="checkbox"/>            | <input checked="" type="checkbox"/> | <input type="checkbox"/>            |
| 4. Was there a control group?                                                                                                               | <input type="checkbox"/>            | <input checked="" type="checkbox"/> | <input type="checkbox"/>            | <input type="checkbox"/>            |
| 5. Were there multiple measurements of the outcome both pre and post the intervention/exposure?                                             | <input checked="" type="checkbox"/> | <input type="checkbox"/>            | <input type="checkbox"/>            | <input type="checkbox"/>            |
| 6. Was follow up complete and if not, were differences between groups in terms of their follow up adequately described and analyzed?        | <input type="checkbox"/>            | <input type="checkbox"/>            | <input type="checkbox"/>            | <input checked="" type="checkbox"/> |
| 7. Were the outcomes of participants included in any comparisons measured in the same way?                                                  | <input checked="" type="checkbox"/> | <input type="checkbox"/>            | <input type="checkbox"/>            | <input type="checkbox"/>            |
| 8. Were outcomes measured in a reliable way?                                                                                                | <input checked="" type="checkbox"/> | <input type="checkbox"/>            | <input type="checkbox"/>            | <input type="checkbox"/>            |
| 9. Was appropriate statistical analysis used?                                                                                               | <input type="checkbox"/>            | <input type="checkbox"/>            | <input type="checkbox"/>            | <input type="checkbox"/>            |

Overall appraisal: Include ☐ Exclude ☐ Seek further info ☐

Comments (Including reason for exclusion)



# **Periodontics and Oral Pathology**

# JBI CRITICAL APPRAISAL CHECKLIST FOR QUASI-EXPERIMENTAL STUDIES

Reviewer \_\_\_\_\_ Date 29.10.2020

Author Ghanoum et al. Year 2019 Record Number 1

|                                                                                                                                             | Yes                                 | No                                  | Unclear                             | Not applicable                      |
|---------------------------------------------------------------------------------------------------------------------------------------------|-------------------------------------|-------------------------------------|-------------------------------------|-------------------------------------|
| 1. Is it clear in the study what is the 'cause' and what is the 'effect' (i.e. there is no confusion about which variable comes first)?     | <input type="checkbox"/>            | <input type="checkbox"/>            | <input checked="" type="checkbox"/> | <input type="checkbox"/>            |
| 2. Were the participants included in any comparisons similar?                                                                               | <input checked="" type="checkbox"/> | <input type="checkbox"/>            | <input type="checkbox"/>            | <input type="checkbox"/>            |
| 3. Were the participants included in any comparisons receiving similar treatment/care, other than the exposure or intervention of interest? | <input type="checkbox"/>            | <input type="checkbox"/>            | <input checked="" type="checkbox"/> | <input type="checkbox"/>            |
| 4. Was there a control group?                                                                                                               | <input type="checkbox"/>            | <input checked="" type="checkbox"/> | <input type="checkbox"/>            | <input type="checkbox"/>            |
| 5. Were there multiple measurements of the outcome both pre and post the intervention/exposure?                                             | <input type="checkbox"/>            | <input checked="" type="checkbox"/> | <input type="checkbox"/>            | <input type="checkbox"/>            |
| 6. Was follow up complete and if not, were differences between groups in terms of their follow up adequately described and analyzed?        | <input type="checkbox"/>            | <input type="checkbox"/>            | <input type="checkbox"/>            | <input checked="" type="checkbox"/> |
| 7. Were the outcomes of participants included in any comparisons measured in the same way?                                                  | <input checked="" type="checkbox"/> | <input type="checkbox"/>            | <input type="checkbox"/>            | <input type="checkbox"/>            |
| 8. Were outcomes measured in a reliable way?                                                                                                | <input checked="" type="checkbox"/> | <input type="checkbox"/>            | <input type="checkbox"/>            | <input type="checkbox"/>            |
| 9. Was appropriate statistical analysis used?                                                                                               | <input type="checkbox"/>            | <input type="checkbox"/>            | <input checked="" type="checkbox"/> | <input type="checkbox"/>            |

Overall appraisal: Include ☒ Exclude ☐ Seek further info ☐

Comments (Including reason for exclusion)

---



---



---

# JBI CRITICAL APPRAISAL CHECKLIST FOR COHORT STUDIES

Reviewer \_\_\_\_\_ Date 30.10.2020

Author Mayer et al Year 2017 Record Number 2

|                                                                                                               | Yes                                 | No                                  | Unclear                             | Not applicable           |
|---------------------------------------------------------------------------------------------------------------|-------------------------------------|-------------------------------------|-------------------------------------|--------------------------|
| 1. Were the two groups similar and recruited from the same population?                                        | <input checked="" type="checkbox"/> | <input type="checkbox"/>            | <input type="checkbox"/>            | <input type="checkbox"/> |
| 2. Were the exposures measured similarly to assign people to both exposed and unexposed groups?               | <input checked="" type="checkbox"/> | <input type="checkbox"/>            | <input type="checkbox"/>            | <input type="checkbox"/> |
| 3. Was the exposure measured in a valid and reliable way?                                                     | <input checked="" type="checkbox"/> | <input type="checkbox"/>            | <input type="checkbox"/>            | <input type="checkbox"/> |
| 4. Were confounding factors identified?                                                                       | <input type="checkbox"/>            | <input checked="" type="checkbox"/> | <input type="checkbox"/>            | <input type="checkbox"/> |
| 5. Were strategies to deal with confounding factors stated?                                                   | <input type="checkbox"/>            | <input checked="" type="checkbox"/> | <input type="checkbox"/>            | <input type="checkbox"/> |
| 6. Were the groups/participants free of the outcome at the start of the study (or at the moment of exposure)? | <input checked="" type="checkbox"/> | <input type="checkbox"/>            | <input type="checkbox"/>            | <input type="checkbox"/> |
| 7. Were the outcomes measured in a valid and reliable way?                                                    | <input checked="" type="checkbox"/> | <input type="checkbox"/>            | <input type="checkbox"/>            | <input type="checkbox"/> |
| 8. Was the follow up time reported and sufficient to be long enough for outcomes to occur?                    | <input checked="" type="checkbox"/> | <input type="checkbox"/>            | <input type="checkbox"/>            | <input type="checkbox"/> |
| 9. Was follow up complete, and if not, were the reasons to loss to follow up described and explored?          | <input type="checkbox"/>            | <input type="checkbox"/>            | <input checked="" type="checkbox"/> | <input type="checkbox"/> |
| 10. Were strategies to address incomplete follow up utilized?                                                 | <input type="checkbox"/>            | <input type="checkbox"/>            | <input checked="" type="checkbox"/> | <input type="checkbox"/> |
| 11. Was appropriate statistical analysis used?                                                                | <input checked="" type="checkbox"/> | <input type="checkbox"/>            | <input type="checkbox"/>            | <input type="checkbox"/> |

Overall appraisal: Include ☒ Exclude ☐ Seek further info ☐

Comments (Including reason for exclusion)

# **JBI CRITICAL APPRAISAL CHECKLIST FOR QUASI-EXPERIMENTAL STUDIES**

Reviewer \_\_\_\_\_ Date 6.11.20

Author Iwami et al Year 2007 Record Number 3

|                                                                                                                                             | Yes                                 | No                                  | Unclear                             | Not applicable                      |
|---------------------------------------------------------------------------------------------------------------------------------------------|-------------------------------------|-------------------------------------|-------------------------------------|-------------------------------------|
| 1. Is it clear in the study what is the 'cause' and what is the 'effect' (i.e. there is no confusion about which variable comes first)?     | <input checked="" type="checkbox"/> | <input type="checkbox"/>            | <input type="checkbox"/>            | <input type="checkbox"/>            |
| 2. Were the participants included in any comparisons similar?                                                                               | <input checked="" type="checkbox"/> | <input type="checkbox"/>            | <input type="checkbox"/>            | <input type="checkbox"/>            |
| 3. Were the participants included in any comparisons receiving similar treatment/care, other than the exposure or intervention of interest? | <input checked="" type="checkbox"/> | <input type="checkbox"/>            | <input type="checkbox"/>            | <input type="checkbox"/>            |
| 4. Was there a control group?                                                                                                               | <input type="checkbox"/>            | <input type="checkbox"/>            | <input checked="" type="checkbox"/> | <input type="checkbox"/>            |
| 5. Were there multiple measurements of the outcome both pre and post the intervention/exposure?                                             | <input type="checkbox"/>            | <input type="checkbox"/>            | <input checked="" type="checkbox"/> | <input type="checkbox"/>            |
| 6. Was follow up complete and if not, were differences between groups in terms of their follow up adequately described and analyzed?        | <input type="checkbox"/>            | <input type="checkbox"/>            | <input type="checkbox"/>            | <input checked="" type="checkbox"/> |
| 7. Were the outcomes of participants included in any comparisons measured in the same way?                                                  | <input checked="" type="checkbox"/> | <input type="checkbox"/>            | <input type="checkbox"/>            | <input type="checkbox"/>            |
| 8. Were outcomes measured in a reliable way?                                                                                                | <input type="checkbox"/>            | <input checked="" type="checkbox"/> | <input type="checkbox"/>            | <input type="checkbox"/>            |
| 9. Was appropriate statistical analysis used?                                                                                               | <input checked="" type="checkbox"/> | <input type="checkbox"/>            | <input type="checkbox"/>            | <input type="checkbox"/>            |

Overall appraisal: Include ☒ Exclude ☐ Seek further info ☐

Comments (Including reason for exclusion)

---



---



---

# JBI CRITICAL APPRAISAL CHECKLIST FOR QUASI-EXPERIMENTAL STUDIES

Reviewer \_\_\_\_\_ Date 6.11.20

Author Berdouses et al Year 2015 Record Number \_\_\_\_\_

4

|                                                                                                                                             | Yes                                 | No                                  | Unclear                             | Not applicable                      |
|---------------------------------------------------------------------------------------------------------------------------------------------|-------------------------------------|-------------------------------------|-------------------------------------|-------------------------------------|
| 1. Is it clear in the study what is the 'cause' and what is the 'effect' (i.e. there is no confusion about which variable comes first)?     | <input checked="" type="checkbox"/> | <input type="checkbox"/>            | <input type="checkbox"/>            | <input type="checkbox"/>            |
| 2. Were the participants included in any comparisons similar?                                                                               | <input type="checkbox"/>            | <input type="checkbox"/>            | <input checked="" type="checkbox"/> | <input type="checkbox"/>            |
| 3. Were the participants included in any comparisons receiving similar treatment/care, other than the exposure or intervention of interest? | <input checked="" type="checkbox"/> | <input type="checkbox"/>            | <input type="checkbox"/>            | <input type="checkbox"/>            |
| 4. Was there a control group?                                                                                                               | <input type="checkbox"/>            | <input checked="" type="checkbox"/> | <input type="checkbox"/>            | <input type="checkbox"/>            |
| 5. Were there multiple measurements of the outcome both pre and post the intervention/exposure?                                             | <input type="checkbox"/>            | <input type="checkbox"/>            | <input checked="" type="checkbox"/> | <input type="checkbox"/>            |
| 6. Was follow up complete and if not, were differences between groups in terms of their follow up adequately described and analyzed?        | <input type="checkbox"/>            | <input type="checkbox"/>            | <input type="checkbox"/>            | <input checked="" type="checkbox"/> |
| 7. Were the outcomes of participants included in any comparisons measured in the same way?                                                  | <input checked="" type="checkbox"/> | <input type="checkbox"/>            | <input type="checkbox"/>            | <input type="checkbox"/>            |
| 8. Were outcomes measured in a reliable way?                                                                                                | <input checked="" type="checkbox"/> | <input type="checkbox"/>            | <input type="checkbox"/>            | <input type="checkbox"/>            |
| 9. Was appropriate statistical analysis used?                                                                                               | <input type="checkbox"/>            | <input type="checkbox"/>            | <input checked="" type="checkbox"/> | <input type="checkbox"/>            |

Overall appraisal: Include ☒ Exclude ☐ Seek further info ☐

Comments (Including reason for exclusion)

# JBI CRITICAL APPRAISAL CHECKLIST FOR COHORT STUDIES

Reviewer \_\_\_\_\_ Date 30.10.2020

Author Torlakovic et al Year 2012 Record Number 5

|                                                                                                               | Yes                                 | No                                  | Unclear                             | Not applicable                      |
|---------------------------------------------------------------------------------------------------------------|-------------------------------------|-------------------------------------|-------------------------------------|-------------------------------------|
| 1. Were the two groups similar and recruited from the same population?                                        | <input checked="" type="checkbox"/> | <input type="checkbox"/>            | <input type="checkbox"/>            | <input type="checkbox"/>            |
| 2. Were the exposures measured similarly to assign people to both exposed and unexposed groups?               | <input checked="" type="checkbox"/> | <input type="checkbox"/>            | <input type="checkbox"/>            | <input type="checkbox"/>            |
| 3. Was the exposure measured in a valid and reliable way?                                                     | <input type="checkbox"/>            | <input type="checkbox"/>            | <input checked="" type="checkbox"/> | <input type="checkbox"/>            |
| 4. Were confounding factors identified?                                                                       | <input checked="" type="checkbox"/> | <input type="checkbox"/>            | <input type="checkbox"/>            | <input type="checkbox"/>            |
| 5. Were strategies to deal with confounding factors stated?                                                   | <input type="checkbox"/>            | <input checked="" type="checkbox"/> | <input type="checkbox"/>            | <input type="checkbox"/>            |
| 6. Were the groups/participants free of the outcome at the start of the study (or at the moment of exposure)? | <input checked="" type="checkbox"/> | <input type="checkbox"/>            | <input type="checkbox"/>            | <input type="checkbox"/>            |
| 7. Were the outcomes measured in a valid and reliable way?                                                    | <input checked="" type="checkbox"/> | <input type="checkbox"/>            | <input type="checkbox"/>            | <input type="checkbox"/>            |
| 8. Was the follow up time reported and sufficient to be long enough for outcomes to occur?                    | <input type="checkbox"/>            | <input type="checkbox"/>            | <input type="checkbox"/>            | <input checked="" type="checkbox"/> |
| 9. Was follow up complete, and if not, were the reasons to loss to follow up described and explored?          | <input type="checkbox"/>            | <input type="checkbox"/>            | <input type="checkbox"/>            | <input checked="" type="checkbox"/> |
| 10. Were strategies to address incomplete follow up utilized?                                                 | <input type="checkbox"/>            | <input type="checkbox"/>            | <input type="checkbox"/>            | <input checked="" type="checkbox"/> |
| 11. Was appropriate statistical analysis used?                                                                | <input checked="" type="checkbox"/> | <input type="checkbox"/>            | <input type="checkbox"/>            | <input type="checkbox"/>            |

Overall appraisal: Include ☒ Exclude ☐ Seek further info ☐

Comments (Including reason for exclusion)

# **Orthodontics**

# JBI CRITICAL APPRAISAL CHECKLIST FOR QUASI-EXPERIMENTAL STUDIES

Reviewer \_\_\_\_\_ Date 15.09.2020

Author Berssenbrügge et al Year 2015 Record Number 1

|                                                                                                                                             | Yes                                 | No                                  | Unclear                             | Not applicable           |
|---------------------------------------------------------------------------------------------------------------------------------------------|-------------------------------------|-------------------------------------|-------------------------------------|--------------------------|
| 1. Is it clear in the study what is the 'cause' and what is the 'effect' (i.e. there is no confusion about which variable comes first)?     | <input checked="" type="checkbox"/> | <input type="checkbox"/>            | <input type="checkbox"/>            | <input type="checkbox"/> |
| 2. Were the participants included in any comparisons similar?                                                                               | <input checked="" type="checkbox"/> | <input type="checkbox"/>            | <input type="checkbox"/>            | <input type="checkbox"/> |
| 3. Were the participants included in any comparisons receiving similar treatment/care, other than the exposure or intervention of interest? | <input checked="" type="checkbox"/> | <input type="checkbox"/>            | <input type="checkbox"/>            | <input type="checkbox"/> |
| 4. Was there a control group?                                                                                                               | <input type="checkbox"/>            | <input checked="" type="checkbox"/> | <input type="checkbox"/>            | <input type="checkbox"/> |
| 5. Were there multiple measurements of the outcome both pre and post the intervention/exposure?                                             | <input type="checkbox"/>            | <input type="checkbox"/>            | <input checked="" type="checkbox"/> | <input type="checkbox"/> |
| 6. Was follow up complete and if not, were differences between groups in terms of their follow up adequately described and analyzed?        | <input type="checkbox"/>            | <input type="checkbox"/>            | <input checked="" type="checkbox"/> | <input type="checkbox"/> |
| 7. Were the outcomes of participants included in any comparisons measured in the same way?                                                  | <input checked="" type="checkbox"/> | <input type="checkbox"/>            | <input type="checkbox"/>            | <input type="checkbox"/> |
| 8. Were outcomes measured in a reliable way?                                                                                                | <input type="checkbox"/>            | <input checked="" type="checkbox"/> | <input type="checkbox"/>            | <input type="checkbox"/> |
| 9. Was appropriate statistical analysis used?                                                                                               | <input checked="" type="checkbox"/> | <input type="checkbox"/>            | <input type="checkbox"/>            | <input type="checkbox"/> |

Overall appraisal: Include ☒ Exclude ☐ Seek further info ☐

Comments (Including reason for exclusion)



## JBI CRITICAL APPRAISAL CHECKLIST FOR COHORT STUDIES

Reviewer \_\_\_\_\_ Date 16.09.2020

Author Jayaratne et al Year 2012 Record Number 2

|                                                                                                               | Yes                                 | No                       | Unclear                             | Not applicable           |
|---------------------------------------------------------------------------------------------------------------|-------------------------------------|--------------------------|-------------------------------------|--------------------------|
| 1. Were the two groups similar and recruited from the same population?                                        | <input checked="" type="checkbox"/> | <input type="checkbox"/> | <input type="checkbox"/>            | <input type="checkbox"/> |
| 2. Were the exposures measured similarly to assign people                                                     | <input checked="" type="checkbox"/> | <input type="checkbox"/> | <input type="checkbox"/>            | <input type="checkbox"/> |
| 3. to both exposed and unexposed groups?                                                                      |                                     |                          |                                     |                          |
| 4. Was the exposure measured in a valid and reliable way?                                                     | <input checked="" type="checkbox"/> | <input type="checkbox"/> | <input type="checkbox"/>            | <input type="checkbox"/> |
| 5. Were confounding factors identified?                                                                       | <input checked="" type="checkbox"/> | <input type="checkbox"/> | <input type="checkbox"/>            | <input type="checkbox"/> |
| 6. Were strategies to deal with confounding factors stated?                                                   | <input checked="" type="checkbox"/> | <input type="checkbox"/> | <input type="checkbox"/>            | <input type="checkbox"/> |
| 7. Were the groups/participants free of the outcome at the start of the study (or at the moment of exposure)? | <input type="checkbox"/>            | <input type="checkbox"/> | <input checked="" type="checkbox"/> | <input type="checkbox"/> |
| 8. Were the outcomes measured in a valid and reliable way?                                                    | <input type="checkbox"/>            | <input type="checkbox"/> | <input checked="" type="checkbox"/> | <input type="checkbox"/> |
| 9. Was the follow up time reported and sufficient to be long enough for outcomes to occur?                    | <input type="checkbox"/>            | <input type="checkbox"/> | <input checked="" type="checkbox"/> | <input type="checkbox"/> |
| 10. Was follow up complete, and if not, were the reasons to loss to follow up described and explored?         | <input type="checkbox"/>            | <input type="checkbox"/> | <input checked="" type="checkbox"/> | <input type="checkbox"/> |
| 11. Were strategies to address incomplete follow up utilized?                                                 | <input type="checkbox"/>            | <input type="checkbox"/> | <input checked="" type="checkbox"/> | <input type="checkbox"/> |
| 12. Was appropriate statistical analysis used?                                                                | <input checked="" type="checkbox"/> | <input type="checkbox"/> | <input type="checkbox"/>            | <input type="checkbox"/> |

Overall appraisal: Include ☒ Exclude ☐ Seek further info ☐

Comments (Including reason for exclusion)

## JBI Critical Appraisal Checklist for Case Series

Reviewer \_\_\_\_\_ Date 15.09.2020

Author Jayarathne et al. Year 2010 Record Number 3

|                                                                                                                 | Yes                                 | No                                  | Unclear                             | Not applicable                      |
|-----------------------------------------------------------------------------------------------------------------|-------------------------------------|-------------------------------------|-------------------------------------|-------------------------------------|
| • Were there clear criteria for inclusion in the case series?                                                   | <input type="checkbox"/>            | <input checked="" type="checkbox"/> | <input type="checkbox"/>            | <input type="checkbox"/>            |
| • Was the condition measured in a standard, reliable way for all participants included in the case series?      | <input checked="" type="checkbox"/> | <input type="checkbox"/>            | <input type="checkbox"/>            | <input type="checkbox"/>            |
| • Were valid methods used for identification of the condition for all participants included in the case series? | <input checked="" type="checkbox"/> | <input type="checkbox"/>            | <input type="checkbox"/>            | <input type="checkbox"/>            |
| • Did the case series have consecutive inclusion of participants?                                               | <input type="checkbox"/>            | <input type="checkbox"/>            | <input checked="" type="checkbox"/> | <input type="checkbox"/>            |
| • Did the case series have complete inclusion of participants?                                                  | <input type="checkbox"/>            | <input type="checkbox"/>            | <input checked="" type="checkbox"/> | <input type="checkbox"/>            |
| • Was there clear reporting of the demographics of the participants in the study?                               | <input checked="" type="checkbox"/> | <input type="checkbox"/>            | <input type="checkbox"/>            | <input type="checkbox"/>            |
| • Was there clear reporting of clinical information of the participants?                                        | <input checked="" type="checkbox"/> | <input type="checkbox"/>            | <input type="checkbox"/>            | <input type="checkbox"/>            |
| • Were the outcomes or follow up results of cases clearly reported?                                             | <input type="checkbox"/>            | <input checked="" type="checkbox"/> | <input type="checkbox"/>            | <input type="checkbox"/>            |
| • Was there clear reporting of the presenting site(s)/clinic(s) demographic information?                        | <input type="checkbox"/>            | <input type="checkbox"/>            | <input checked="" type="checkbox"/> | <input type="checkbox"/>            |
| • Was statistical analysis appropriate?                                                                         | <input type="checkbox"/>            | <input type="checkbox"/>            | <input type="checkbox"/>            | <input checked="" type="checkbox"/> |

Overall appraisal: Include ☒ Exclude ☐ Seek further info ☐

Comments (Including reason for exclusion)

---

---

# JBI CRITICAL APPRAISAL CHECKLIST FOR COHORT STUDIES

Reviewer \_\_\_\_\_ Date 17.09.2020  
 Author Brough et al Year 2010 Record Number 4

|                                                                                                               | Yes                                 | No                                  | Unclear                             | Not applicable                      |
|---------------------------------------------------------------------------------------------------------------|-------------------------------------|-------------------------------------|-------------------------------------|-------------------------------------|
| 1. Were the two groups similar and recruited from the same population?                                        | <input checked="" type="checkbox"/> | <input type="checkbox"/>            | <input type="checkbox"/>            | <input type="checkbox"/>            |
| 2. Were the exposures measured similarly to assign people to both exposed and unexposed groups?               | <input checked="" type="checkbox"/> | <input type="checkbox"/>            | <input type="checkbox"/>            | <input type="checkbox"/>            |
| 3. Was the exposure measured in a valid and reliable way?                                                     | <input checked="" type="checkbox"/> | <input type="checkbox"/>            | <input type="checkbox"/>            | <input type="checkbox"/>            |
| 4. Were confounding factors identified?                                                                       | <input checked="" type="checkbox"/> | <input type="checkbox"/>            | <input type="checkbox"/>            | <input type="checkbox"/>            |
| 5. Were strategies to deal with confounding factors stated?                                                   | <input type="checkbox"/>            | <input type="checkbox"/>            | <input checked="" type="checkbox"/> | <input type="checkbox"/>            |
| 6. Were the groups/participants free of the outcome at the start of the study (or at the moment of exposure)? | <input checked="" type="checkbox"/> | <input type="checkbox"/>            | <input type="checkbox"/>            | <input type="checkbox"/>            |
| 7. Were the outcomes measured in a valid and reliable way?                                                    | <input type="checkbox"/>            | <input checked="" type="checkbox"/> | <input type="checkbox"/>            | <input type="checkbox"/>            |
| 8. Was the follow up time reported and sufficient to be long enough for outcomes to occur?                    | <input type="checkbox"/>            | <input type="checkbox"/>            | <input type="checkbox"/>            | <input checked="" type="checkbox"/> |
| 9. Was follow up complete, and if not, were the reasons to loss to follow up described and explored?          | <input type="checkbox"/>            | <input type="checkbox"/>            | <input type="checkbox"/>            | <input checked="" type="checkbox"/> |
| 10. Were strategies to address incomplete follow up utilized?                                                 | <input type="checkbox"/>            | <input type="checkbox"/>            | <input type="checkbox"/>            | <input checked="" type="checkbox"/> |
| 11. Was appropriate statistical analysis used?                                                                | <input checked="" type="checkbox"/> | <input type="checkbox"/>            | <input type="checkbox"/>            | <input type="checkbox"/>            |

Overall appraisal: Include ☒ Exclude ☐ Seek further info ☐

Comments (Including reason for exclusion)
